# Supplementary material
Source: HighWire-hosted journal article supplement (https://heart.bmj.com/content/105/18/1388)
Supplement: inline-supplementary-material-1 [file inline-supplementary-material-1.pdf]

## SUPPLEMENTARY FILE 1

### Search strategy: Medline, Embase, PsychInfo, Global Health

1. exp Cardiovascular Diseases/
2. cardio\*.tw.
3. cardia\*.tw.
4. heart\*.tw.
5. coronary\*.tw.
6. angina\*.tw.
7. ventric\*.tw.
8. myocard\*.tw.
9. pericard\*.tw.
10. isch?em\*.tw.
11. emboli\*.tw.
12. arrhythmi\*.tw.
13. thrombo\*.tw.
14. atrial fibrillat\*.tw.
15. tachycardi\*.tw.
16. endocardi\*.tw.
17. (sick adj sinus).tw.
18. exp Stroke/
19. (stroke or stokes).tw.
20. cerebrovasc\*.tw.
21. cerebral vascular.tw.
22. apoplexy.tw.
23. (brain adj2 accident\*).tw.
24. ((brain\* or cerebral or lacunar) adj2 infarct\*).tw.
25. exp Hypertension/
26. hypertensi\*.tw.
27. peripheral arter\* disease\*.tw.
28. ((high or increased or elevated) adj2 blood pressure).tw.
29. exp Hyperlipidemias/
30. hyperlipid\*.tw.
31. hyperlip?emia\*.tw.
32. hypercholesterol\*.tw.
33. hypercholester?emia\*.tw.
34. hyperlipoprotein?emia\*.tw.
35. hypertriglycerid?emia\*.tw.
36. exp Arteriosclerosis/
37. exp Cholesterol/
38. cholesterol.tw.
39. Blood Pressure/
40. blood pressure.tw.
41. Diabetes Mellitus/
42. Diabetes Mellitus, Type 2/
43. (diabetes adj3 mellitus).tw.
44. exp Hyperglycemia/
45. hyperglycemia\*.tw.
46. glycemia\*.tw.
47. Smoking/
48. exp "Tobacco Use Cessation"/
49. "Tobacco Use Disorder"/
50. (smoke or smoking or smoker or smokers or smoked).tw.
51. ((cigar\* or tobacco or nicotin\*) adj2 consum\*).tw.
52. bmi.tw.
53. overweight.tw.
54. body mass index/
55. exp Abdominal Fat/
56. exp Overweight/
57. obes\*.tw.
58. (weight adj2 (gain\* or chang\*)).tw.
59. (body mass adj (index or indexes or indices)).tw.
60. abdominal fat.tw.
61. quetelet\* index.tw.
62. ((high or increased) adj2 body weight).tw.
63. exp Exercise/
64. exp Exercise Therapy/
65. Exercise Tolerance/
66. exercis\*.tw.
67. (physical adj3 activ\*).tw.
68. Physical Fitness/
69. exp Alcohol-Related Disorders/
70. Alcohol Drinking/
71. (alcohol adj3 (drink\$ or intoxicat\$ or use\$ or abus\$ or misus\$ or risk\$ or consum\$ or withdraw\$ or detox\$ or treat\$ or therap\$ or excess\$ or reduc\$ or cessation or intervention\$)).tw.
72. ("alcohol use" or alcoholic\$).tw.
73. or/1-72
74. Armed Conflict/
75. exp Warfare/
76. exp War Exposure/
77. ((armed or zone) adj2 conflict\*).tw.
78. war.tw.
79. wars.tw.
80. ("conflict affected" adj3 (population\* or person\* or communit\*)).mp. [mp=ti, ab, hw, tn, ot, dm, mf, dv, kw, fx, dq, bt, id, cc, nm, kf, px, rx, ui, sy, tc, tm]
81. wartime.tw.

82. warfare.tw.
83. or/74-82
84. Developing Countries.sh,kf.
85. ((developing or less\* developed or under developed or underdeveloped or middle income or low\* income or underserved or under served or deprived or poor\*) adj (countr\* or nation? or population? or world)).ti,ab.
86. (low\* adj (gdp or gnp or gross domestic or gross national)).ti,ab.
87. (low adj3 middle adj3 countr\*).ti,ab.
88. (Imic or Imics or third world or lami countr\*).ti,ab.
89. transitional countr\*.ti,ab.
90. Cambodia/
91. (cambodia\* or Kampuchea).cp,in,jw,mp.
92. "Democratic People's Republic of Korea"/
93. (north korea\* or (democratic people\* republic adj2 korea)).cp,in,jw,mp.
94. Myanmar/
95. (myanmar or burma or burmese).cp,in,jw,mp.
96. Fiji/
97. fiji\*.cp,in,jw,mp.
98. Indonesia/
99. indonesia\*.cp,in,jw,mp.
100. Micronesia/
101. (Micronesia\* or Kiribati).cp,in,jw,mp.
102. Laos/
103. (laos or (lao adj1 democratic republic) or (lao adj2 people) or marshall island\*).cp,in,jw,mp.
104. Mongolia/
105. mongolia\*.cp,in,jw,mp.
106. Papua New Guinea/
107. Papua New Guinea.cp,in,jw,mp.
108. Philippines/
109. (Philippines or filipino\*).cp,in,jw,mp.
110. samoa/ or "independent state of samoa"/
111. samoa\*.cp,in,jw,mp.
112. Melanesia/
113. (Solomon Islands or Timor-Leste or Melanesia\*).cp,in,jw,mp.
114. Tonga/
115. tonga\*.cp,in,jw,mp.
116. Vanuatu/
117. Vanuatu.cp,in,jw,mp.
118. Vietnam/
119. Vietnam\*.cp,in,jw,mp.
120. exp China/
121. (china or chinese).cp,in,jw,mp.
122. Malaysia/
123. Malaysia\*.cp,in,jw,mp.
124. Palau/
125. (Palau or Belau or Pelew).cp,in,jw,mp.
126. Thailand/
127. (Thailand or thai\*).cp,in,jw,mp.
128. (tuvalu or ellice islands).cp,in,jw,mp.
129. Kyrgyzstan/
130. (kyrgyzstan or kyrgyz or kirghizia or kirghiz).cp,in,jw,mp.
131. Tajikistan/
132. (tajikistan or tadjhik or tadjhikistan or tajikistan).cp,in,jw,mp.
133. Albania/
134. Albania\*.cp,in,jw,mp.
135. Armenia/
136. Armenia\*.cp,in,jw,mp.
137. "Georgia (Republic)"/
138. georgia\*.cp,in,jw,mp.
139. Yugoslavia/
140. (Jugoslavija\* or Yugoslavia\* or serbo-croat\* or macedonia\* or sloven\* or kosovo).cp,in,jw,mp.
141. Moldova/
142. Moldova\*.cp,in,jw,mp.
143. Ukraine/
144. Ukrain\*.cp,in,jw,mp.
145. Uzbekistan/
146. Uzbekistan.cp,in,jw,mp.
147. Azerbaijan/
148. Azerbaijan\*.cp,in,jw,mp.
149. "Republic of Belarus"/
150. (belarus or byelarus or belorussia).cp,in,jw,mp.
151. Bosnia-Herzegovina/
152. bosnia\*.cp,in,jw,mp.
153. Bulgaria/
154. Bulgaria\*.cp,in,jw,mp.
155. Kazakhstan/
156. (Kazakhstan or kazakh).cp,in,jw,mp.
157. Latvia/
158. Latvia\*.cp,in,jw,mp.
159. Lithuania/

160. Lithuania\*.cp,in,jw,mp.
161. "Macedonia (Republic)"/
162. Macedonia\*.cp,in,jw,mp.
163. Montenegro/
164. Montenegro.cp,in,jw,mp.
165. Romania/
166. Romania\*.cp,in,jw,mp.
167. exp Russia/
168. USSR/
169. (russia\* or ussr or soviet or ccp).cp,in,jw,mp.
170. Serbia/
171. serbia\*.cp,in,jw,mp.
172. Turkey/
173. turk\*.cp,in,jw,mp. not animal/
174. Turkmenistan/
175. Haiti/
176. Haiti/
177. Haiti.cp,in,jw,mp.
178. Belize/
179. Belize.cp,in,jw,mp.
180. Bolivia/
181. Bolivia\*.cp,in,jw,mp.
182. El Salvador/
183. El Salvador.cp,in,jw,mp.
184. Guatemala/
185. Guatemala\*.cp,in,jw,mp.
186. Guyana/
187. Guyana\*.cp,in,jw,mp.
188. Honduras/
189. Hondura\*.cp,in,jw,mp.
190. Nicaragua/
191. Nicaragua.cp,in,jw,mp.
192. Paraguay/
193. Paraguay.cp,in,jw,mp.
194. "Antigua and Barbuda"/
195. (Antigua or Barbuda).cp,in,jw,mp.
196. Argentina/
197. Argentin\*.cp,in,jw,mp.
198. Brazil/
199. Brazil\*.cp,in,jw,mp.
200. Chile/
201. Chile\*.cp,in,jw,mp.
202. Colombia/
203. Colombia\*.cp,in,jw,mp.
204. Costa Rica/
205. Costa Rica\*.cp,in,jw,mp.
206. Cuba/
207. Cuba\*.cp,in,jw,mp.
208. Dominica/
209. Dominican Republic/
210. Dominica\*.cp,in,jw,mp.
211. Ecuador/
212. Ecuador\*.cp,in,jw,mp.
213. Grenada/
214. Grenad\*.cp,in,jw,mp.
215. Jamaica/
216. Jamaica\*.cp,in,jw,mp.
217. Mexico/
218. Mexic\*.cp,in,jw,mp.
219. exp Panama/
220. Peru/
221. Peru\*.cp,in,jw,mp.
222. Saint Lucia/
223. (St Lucia\* or Saint Lucia\*).cp,in,jw,mp.
224. "Saint Vincent and the Grenadines"/
225. Grenadines.cp,in,jw,mp.
226. Suriname/
227. Surinam\*.cp,in,jw,mp.
228. Uruguay/
229. Uruguay.cp,in,jw,mp.
230. Venezuela/
231. Venezuela\*.cp,in,jw,mp.
232. Djibouti/
233. Djibouti.cp,in,jw,mp.
234. Egypt/
235. Egypt\*.cp,in,jw,mp.
236. Iraq/
237. Iraq\*.cp,in,jw,mp.
238. Morocco/
239. Morocc\*.cp,in,jw,mp.
240. Syria/
241. (Syria\* or gaza\*).cp,in,jw,mp.
242. Yemen/
243. yemen\*.cp,in,jw,mp.
244. Algeria/
245. Algeria\*.cp,in,jw,mp.
246. Iran/
247. Iran\*.cp,in,jw,mp.
248. Jordan/
249. jordan\*.cp,in,jw,mp.
250. Lebanon/
251. Leban\*.cp,in,jw,mp.
252. Libya/
253. Libya\*.cp,in,jw,mp.
254. Tunisia/
255. Tunisia\*.cp,in,jw,mp.
256. Afghanistan/
257. Afghan\*.cp,in,jw,mp.

258. Bangladesh/  
259. Bangladesh\*.cp,in,jw,mp.  
260. Nepal/  
261. Nepal\*.cp,in,jw,mp.  
262. Bhutan/  
263. Bhutan\*.cp,in,jw,mp.  
264. exp India/  
265. india\*.cp,in,jw,mp.  
266. Pakistan/  
267. Pakistan\*.cp,in,jw,mp.  
268. Sri Lanka/  
269. Sri Lanka\*.cp,in,jw,mp.  
270. Indian Ocean Islands/  
271. Maldiv\*.cp,in,jw,mp.  
272. Benin/  
273. (Benin or Dahomey).cp,in,jw,mp.  
274. Burkina Faso/  
275. (Burkina Faso or Burkina Fasso or Upper Volta).cp,in,jw,mp.  
276. Burundi/  
277. Burundi\*.cp,in,jw,mp.  
278. Central African Republic/  
279. (Central African Republic or Ubangi-Shari or african\*).cp,in,jw,mp.  
280. Chad/  
281. Chad.cp,in,jw,mp.  
282. Comoros/  
283. (comoros or comores).cp,in,jw,mp.  
284. "Democratic Republic of the Congo"/  
285. (congo\* or zaire).cp,in,jw,mp.  
286. Eritrea/  
287. Eritrea\*.cp,in,jw,mp.  
288. Ethiopia/  
289. Ethiopia\*.cp,in,jw,mp.  
290. Gambia/  
291. Gambia\*.cp,in,jw,mp.  
292. Guinea/  
293. (Guinea\* not (New Guinea or Guinea Pig\* or Guinea Fowl)).cp,in,jw,mp.  
294. Guinea-Bissau/  
295. (Guinea-Bissau or Portuguese Guinea).cp,in,jw,mp.  
296. Kenya/  
297. Kenya\*.cp,in,jw,mp.  
298. Liberia/  
299. Liberia\*.cp,in,jw,mp.  
300. Madagascar/  
301. (Madagasca\* or Malagasy Republic).cp,in,jw,mp.  
302. Malawi/  
303. (Malawi\* or Nyasaland).cp,in,jw,mp.  
304. Mali/  
305. Mali\*.cp,in,jw,mp.  
306. Mauritania/  
307. Mauritania\*.cp,in,jw,mp.  
308. Mozambique/  
309. (Mozambi\* or Portuguese East Africa).cp,in,jw,mp.  
310. Niger/  
311. (Niger not (Aspergillus or Peptococcus or Schizothorax or Cruciferae or Gobius or Lasius or Agelastes or Melanosuchus or radish or Parastromateus or Orius or Apergillus or Parastromateus or Stomoxys)).cp,in,jw,mp.  
312. Rwanda/  
313. (Rwanda\* or Ruanda\*).cp,in,jw,mp.  
314. Sierra Leone/  
315. Sierra Leone\*.cp,in,jw,mp.  
316. Somalia/  
317. Somali\*.cp,in,jw,mp.  
318. Tanzania/  
319. Tanzania\*.cp,in,jw,mp.  
320. Togo/  
321. Togo\*.cp,in,jw,mp.  
322. Uganda/  
323. Uganda\*.cp,in,jw,mp.  
324. Zimbabwe/  
325. (Zimbabwe\* or Rhodesia\*).cp,in,jw,mp.  
326. Cameroon/  
327. Cameroon\*.cp,in,jw,mp.  
328. Cape Verde/  
329. Cape Verde\*.cp,in,jw,mp.  
330. Congo/  
331. (congo\* not ((democratic republic adj3 congo) or congo red or crimean-congo)).cp,in,jw,mp.  
332. Cote d'Ivoire/  
333. (Cote d'Ivoire or Ivory Coast).cp,in,jw,mp.  
334. Ghana/  
335. (Ghan\* or Gold Coast).cp,in,jw,mp.  
336. Lesotho/  
337. (Lesotho or Basutoland).cp,in,jw,mp.  
338. Nigeria/  
339. Nigeria\*.cp,in,jw,mp.  
340. Atlantic Islands/  
341. (sao tome adj2 principe).cp,in,jw,mp.

- 342. Senegal/
- 343. Senegal\*.cp,in,jw,mp.
- 344. Sudan/
- 345. Sudan\*.cp,in,jw,mp.
- 346. Swaziland/
- 347. Swazi\*.cp,in,jw,mp.
- 348. Zambia/
- 349. (Zambia\* or Northern Rhodesia\*).cp,in,jw,mp.
- 350. Angola/
- 351. Angola\*.cp,in,jw,mp.
- 352. Botswana/
- 353. (Botswana\* or Bechuanaland or Kalahari).cp,in,jw,mp.
- 354. Gabon/
- 355. Gabon\*.cp,in,jw,mp.
- 356. Mauritius/
- 357. (Mauriti\* or Agalega Islands).cp,in,jw,mp.
- 358. Namibia/
- 359. Namibia\*.cp,in,jw,mp.
- 360. Seychelles/
- 361. Seychelles.cp,in,jw,mp.
- 362. South Africa/
- 363. South Africa\*.cp,in,jw,mp.
- 364. or/84-363
- 365. exp animals/ not humans.sh.
- 366. 73 and 83 and 364
- 367. 366 not 365

**Additional methodological details: data abstraction**

We abstracted data with respect to the study governance (funding source, ethics approval, conflicts of interest), features (design, timing, setting, data source), setting (conflict, country, level of jurisdiction) population (sample size, mean age/age range, percentage of males), and results (outcome measure definition, outcome measure effect size and precision, and author conclusions regarding the direction of the effect (increasing, decreasing, no change, or not reported)). We calculated the longest number of years from the onset or end of conflict to the time of data collection, to give an indication of the maximum length of exposure that participants were exposed to prior to the measurement of outcomes.

## Individual study characteristics and results

| Cardiovascular Diseases (I00-I59, I70-I99)                                                                                    |                                                                                                                                                                                                                                                             |                                                                                                                                                                                                                                                                                                                                                  |                                                                                                                                                                                                                                                                                                                                                                                                                                                                                                                                                                 |
|-------------------------------------------------------------------------------------------------------------------------------|-------------------------------------------------------------------------------------------------------------------------------------------------------------------------------------------------------------------------------------------------------------|--------------------------------------------------------------------------------------------------------------------------------------------------------------------------------------------------------------------------------------------------------------------------------------------------------------------------------------------------|-----------------------------------------------------------------------------------------------------------------------------------------------------------------------------------------------------------------------------------------------------------------------------------------------------------------------------------------------------------------------------------------------------------------------------------------------------------------------------------------------------------------------------------------------------------------|
| Author, funding, ethics                                                                                                       | Study design and setting                                                                                                                                                                                                                                    | Study characteristics                                                                                                                                                                                                                                                                                                                            | Outcome                                                                                                                                                                                                                                                                                                                                                                                                                                                                                                                                                         |
| <b>Alajbegovic 2006</b> <ul style="list-style-type: none"> <li>Funding: Not reported</li> <li>Ethics: Not reported</li> </ul> | <ul style="list-style-type: none"> <li>Design: Ecological</li> <li>Conflict: Bosnian War (1992-1995)</li> <li>Jurisdiction: City</li> <li>Setting: Hospital</li> <li>Exposure: Uniform</li> </ul>                                                           | <ul style="list-style-type: none"> <li>Study year: 1991, 1993, 1996</li> <li>Sample size: 506</li> <li>Age: 40-79 years</li> <li>% Male: 38.5</li> <li>Time between exposure and outcome: 2 years</li> <li>NOS Score: 1 <ul style="list-style-type: none"> <li>Selection: 0</li> <li>Comparability: 0</li> <li>Outcome: 1</li> </ul> </li> </ul> | <ul style="list-style-type: none"> <li>Outcome: Acute myocardial infarction (I21)</li> <li>Measured: Clinical picture, ECG, enzymes, and echocardiography in particular cases</li> <li>Epidemiological measure: Incidence</li> <li>Effect estimate and direction (recalculated): <ul style="list-style-type: none"> <li>Pre- vs. during conflict: 11.0 (95% CI -25.0 to 47.0); No change</li> <li>Pre- vs. post conflict: 6 (95% CI -29.7 to 41.7); No change</li> <li>During- vs. post conflict: -5.0 (95% CI -41.3 to 31.3); No change</li> </ul> </li> </ul> |
| <b>Atwoli 2016</b> <ul style="list-style-type: none"> <li>Funding: Yes</li> <li>Ethics: Yes</li> </ul>                        | <ul style="list-style-type: none"> <li>Design: Cross-sectional</li> <li>Conflict: Unspecified conflicts in South Africa</li> <li>Jurisdiction: National</li> <li>Setting: Community</li> <li>Exposure: Exposed to specific armed conflict events</li> </ul> | <ul style="list-style-type: none"> <li>Study year: 2002-2005</li> <li>Sample size: 4351</li> <li>Age: 18+ years</li> <li>% Male: 46</li> <li>Time between exposure and outcome: N/A</li> <li>NOS Score: 6 <ul style="list-style-type: none"> <li>Selection: 3</li> <li>Comparability: 2</li> <li>Outcome: 1</li> </ul> </li> </ul>               | <ul style="list-style-type: none"> <li>Outcome: Complications and ill-defined descriptions of heart disease (I51)</li> <li>Measured: Self-reported</li> <li>Epidemiological measure: Adjusted odds ratio</li> <li>Effect estimate and direction (as reported): 1.38 (95% CI 0.95-2.00); No change</li> </ul>                                                                                                                                                                                                                                                    |
| <b>Babic 2013</b> <ul style="list-style-type: none"> <li>Funding: Not reported</li> <li>Ethics: Not reported</li> </ul>       | <ul style="list-style-type: none"> <li>Design: Cross-sectional</li> <li>Conflict: Bosnian War (1992-1995)</li> <li>Jurisdiction: City</li> <li>Setting: Hospital</li> <li>Exposure: PTSD</li> </ul>                                                         | <ul style="list-style-type: none"> <li>Study year: Not reported</li> <li>Sample size: 120</li> <li>Age: 50-52 years</li> <li>% Male: 100</li> <li>Time between exposure and outcome: 20 years</li> <li>NOS Score: 2 <ul style="list-style-type: none"> <li>Selection: 0</li> </ul> </li> </ul>                                                   | <ul style="list-style-type: none"> <li>Outcome: Essential (primary) hypertension (I10)</li> <li>Measured: Not reported</li> <li>Epidemiological measure: Relative risk</li> <li>Effect estimate and direction (recalculated): 1.13 (95% CI 0.51-2.49); No change</li> </ul>                                                                                                                                                                                                                                                                                     |

| <b>Cardiovascular Diseases (I00-I59, I70-I99)</b>                                                                              |                                                                                                                                                                                                                                 |                                                                                                                                                                                                                                                                                                                                                                    |                                                                                                                                                                                                                                                                                                                                                                                                                                                                                                                                                                                                                                                                                        |
|--------------------------------------------------------------------------------------------------------------------------------|---------------------------------------------------------------------------------------------------------------------------------------------------------------------------------------------------------------------------------|--------------------------------------------------------------------------------------------------------------------------------------------------------------------------------------------------------------------------------------------------------------------------------------------------------------------------------------------------------------------|----------------------------------------------------------------------------------------------------------------------------------------------------------------------------------------------------------------------------------------------------------------------------------------------------------------------------------------------------------------------------------------------------------------------------------------------------------------------------------------------------------------------------------------------------------------------------------------------------------------------------------------------------------------------------------------|
| <b>Author, funding, ethics</b>                                                                                                 | <b>Study design and setting</b>                                                                                                                                                                                                 | <b>Study characteristics</b>                                                                                                                                                                                                                                                                                                                                       | <b>Outcome</b>                                                                                                                                                                                                                                                                                                                                                                                                                                                                                                                                                                                                                                                                         |
|                                                                                                                                |                                                                                                                                                                                                                                 | <ul style="list-style-type: none"> <li>- Comparability: 2</li> <li>- Outcome: 0</li> </ul>                                                                                                                                                                                                                                                                         |                                                                                                                                                                                                                                                                                                                                                                                                                                                                                                                                                                                                                                                                                        |
| <b>Bergovec 1992</b> <ul style="list-style-type: none"> <li>• Funding: Not reported</li> <li>• Ethics: Not reported</li> </ul> | <ul style="list-style-type: none"> <li>• Design: Ecological</li> <li>• Conflict: Croatian War of Independence (1991 to 1995)</li> <li>• Jurisdiction: City</li> <li>• Setting: Hospital</li> <li>• Exposure: Uniform</li> </ul> | <ul style="list-style-type: none"> <li>• Study year: 1989-1991</li> <li>• Sample size: 87</li> <li>• Age: 60-66 years</li> <li>• % Male: Not reported</li> <li>• Time between exposure and outcome: 2 years</li> <li>• NOS Score: 1 <ul style="list-style-type: none"> <li>- Selection: 1</li> <li>- Comparability: 0</li> <li>- Outcome: 0</li> </ul> </li> </ul> | <ul style="list-style-type: none"> <li>• Outcome: Acute myocardial infarction (I21)</li> <li>• Measured: Chest pain for more than 20 minutes, enzyme changes (creatine kinase) and ECG changes.</li> <li>• Epidemiological measure: Incidence</li> <li>• Effect estimate and direction (recalculated): 12.0 (95% CI -3.4 to 26.4)<br/>No change</li> <li>• Outcome: Acute myocardial infarction (I21) - Mortality</li> <li>• Measured: Chest pain for more than 20 minutes, enzyme changes (creatine kinase) and ECG changes.</li> <li>• Epidemiological measure: Incidence</li> <li>• Effect estimate and direction (recalculated): 11.5 (95% CI 4.0 to 19.0)<br/>Increase</li> </ul> |
| <b>Bergovec 1992</b> <ul style="list-style-type: none"> <li>• Funding: Not reported</li> <li>• Ethics: Not reported</li> </ul> | <ul style="list-style-type: none"> <li>• Design: Ecological</li> <li>• Conflict: Croatian War of Independence (1991 to 1995)</li> <li>• Jurisdiction: City</li> <li>• Setting: Hospital</li> <li>• Exposure: Uniform</li> </ul> | <ul style="list-style-type: none"> <li>• Study year: 1989-1991</li> <li>• Sample size: 87</li> <li>• Age: 60-66 years</li> <li>• % Male: Not reported</li> <li>• Time between exposure and outcome: 2 years</li> <li>• NOS Score: 0 <ul style="list-style-type: none"> <li>- Selection: 0</li> <li>- Comparability: 0</li> <li>- Outcome: 0</li> </ul> </li> </ul> | <ul style="list-style-type: none"> <li>• Outcome: Angina pectoris (I20)</li> <li>• Measured: Unclear</li> <li>• Epidemiological measure: Incidence</li> <li>• Effect estimate and direction: 2.5 (95% CI -15.2 to 20.2)<br/>No change</li> <li>• Outcome: Angina pectoris (I20) - Mortality</li> <li>• Measured: Unclear</li> <li>• Epidemiological measure: Incidence</li> <li>• Effect estimate and direction (recalculated):: 0.5 (95% CI -3.2 to 4.2)<br/>No change</li> </ul>                                                                                                                                                                                                     |



**Cardiovascular Diseases (I00-I59, I70-I99)**

| <b>Author, funding, ethics</b>                                                                                               | <b>Study design and setting</b>                                                                                                                                                                          | <b>Study characteristics</b>                                                                                                                                                                                                                                                                                                                                     | <b>Outcome</b>                                                                                                                                                                                                                                                                                                                                                                                                                                                                                                                                                                                                                                                             |
|------------------------------------------------------------------------------------------------------------------------------|----------------------------------------------------------------------------------------------------------------------------------------------------------------------------------------------------------|------------------------------------------------------------------------------------------------------------------------------------------------------------------------------------------------------------------------------------------------------------------------------------------------------------------------------------------------------------------|----------------------------------------------------------------------------------------------------------------------------------------------------------------------------------------------------------------------------------------------------------------------------------------------------------------------------------------------------------------------------------------------------------------------------------------------------------------------------------------------------------------------------------------------------------------------------------------------------------------------------------------------------------------------------|
| <b>Bergovec 2005</b> <ul style="list-style-type: none"> <li>Funding: Not reported</li> <li>Ethics: Not reported</li> </ul>   | <ul style="list-style-type: none"> <li>Design: Ecological</li> <li>Conflict: Bosnian War (1992-1995)</li> <li>Jurisdiction: Subnational</li> <li>Setting: Hospital</li> <li>Exposure: Uniform</li> </ul> | <ul style="list-style-type: none"> <li>Study year: 1987-1996</li> <li>Sample size: 793</li> <li>Age: Not reported</li> <li>% Male: Not reported</li> <li>Time between exposure and outcome: 9 years</li> <li>NOS Score: 1               <ul style="list-style-type: none"> <li>Selection: 0</li> <li>Comparability: 0</li> <li>Outcome: 1</li> </ul> </li> </ul> | <ul style="list-style-type: none"> <li>Outcome: Acute myocardial infarction (I21)</li> <li>Measured: 2 of 3 criteria: symptoms, enzymes, ECG changes</li> <li>Epidemiological measure: Incidence</li> <li>Effect estimate and direction (recalculated): 63.0 (95% CI 7.8 to 118.2); Increase</li> <li>Outcome: Angina pectoris (I20)</li> <li>Measured: Rest angina, increasing angina, new-onset severe angina as per Canadian Cardiovascular Society class III or greater</li> <li>Epidemiological measure: Incidence</li> <li>Effect estimate and direction (recalculated): 60.0 (25.5 to 94.5); Increase</li> </ul>                                                    |
| <b>Dumitrascu 1993</b> <ul style="list-style-type: none"> <li>Funding: Not reported</li> <li>Ethics: Not reported</li> </ul> | <ul style="list-style-type: none"> <li>Design: Ecological</li> <li>Conflict: Romanian Revolution of 1989</li> <li>Jurisdiction: City</li> <li>Setting: Hospital</li> <li>Exposure: Uniform</li> </ul>    | <ul style="list-style-type: none"> <li>Study year: 1988-1991</li> <li>Sample size: 628</li> <li>Age: Not reported</li> <li>% Male: Not reported</li> <li>Time between exposure and outcome: 1 year</li> <li>NOS Score: 1               <ul style="list-style-type: none"> <li>Selection: 1</li> <li>Comparability: 0</li> </ul> </li> <li>Outcome: 0</li> </ul>  | <ul style="list-style-type: none"> <li>Outcome: Angina pectoris (I20)</li> <li>Measured: ED admissions</li> <li>Epidemiological measure: Incidence</li> <li>Effect estimate and direction (recalculated):               <ul style="list-style-type: none"> <li>Pre- vs. during conflict: 1.0 (95% CI -6.1 to 8.1); No change</li> <li>Pre- vs. post conflict: 0.3 (95% CI -6.5 to 7.2); No change</li> <li>During- vs. post conflict: -0.7 (95% CI -7.8 to 6.5); No change</li> </ul> </li> <li>Outcome: Acute myocardial infarction (I21)</li> <li>Measured: ED admissions</li> <li>Epidemiological measure: Incidence</li> <li>Effect estimate and direction:</li> </ul> |

| Cardiovascular Diseases (I00-I59, I70-I99)                                                                         |                                                                                                                                                                                                                                                                |                                                                                                                                                                                                                                                                                                                                                            |                                                                                                                                                                                                                                                                                                                                                                                                                                                                                                                                                                        |
|--------------------------------------------------------------------------------------------------------------------|----------------------------------------------------------------------------------------------------------------------------------------------------------------------------------------------------------------------------------------------------------------|------------------------------------------------------------------------------------------------------------------------------------------------------------------------------------------------------------------------------------------------------------------------------------------------------------------------------------------------------------|------------------------------------------------------------------------------------------------------------------------------------------------------------------------------------------------------------------------------------------------------------------------------------------------------------------------------------------------------------------------------------------------------------------------------------------------------------------------------------------------------------------------------------------------------------------------|
| Author, funding, ethics                                                                                            | Study design and setting                                                                                                                                                                                                                                       | Study characteristics                                                                                                                                                                                                                                                                                                                                      | Outcome                                                                                                                                                                                                                                                                                                                                                                                                                                                                                                                                                                |
|                                                                                                                    |                                                                                                                                                                                                                                                                |                                                                                                                                                                                                                                                                                                                                                            | <ul style="list-style-type: none"> <li>- Pre- vs. during conflict:<br/>-1.0 (95% CI -6.9 to 4.9);<br/>No change</li> <li>- Pre- vs. post conflict:<br/>-2.0 (95% CI -7.5 to 3.5);<br/>No change</li> <li>- During- vs. post conflict:<br/>-1.0 (95% CI -6.2 to 4.2);<br/>No change</li> </ul>                                                                                                                                                                                                                                                                          |
| <b>Ghaddar 2016</b> <ul style="list-style-type: none"> <li>• Funding: Yes</li> <li>• Ethics: Yes</li> </ul>        | <ul style="list-style-type: none"> <li>• Design: Cross-sectional</li> <li>• Conflict: Lebanese Civil War (1975-1991)</li> <li>• Jurisdiction: Subnational</li> <li>• Setting: Community</li> <li>• Exposure: Hostage of war</li> </ul>                         | <ul style="list-style-type: none"> <li>• Study year: 2008-2010</li> <li>• Sample size: 67</li> <li>• Age: 31-65+ years</li> <li>• % Male: 50</li> <li>• Time between exposure and outcome: 28 years</li> <li>• NOS Score: 6 <ul style="list-style-type: none"> <li>- Selection: 2</li> <li>- Comparability: 2</li> <li>- Outcome: 2</li> </ul> </li> </ul> | <ul style="list-style-type: none"> <li>• Outcome: Complications and ill-defined descriptions of heart disease (I51)</li> <li>• Measured: ECG and ankle-arm blood pressure</li> <li>• Epidemiological measure: Adjusted odds ratio</li> <li>• Effect estimate and direction (as reported): 21.22 (95% CI 2.96 to 4.77);<br/>Increase</li> </ul>                                                                                                                                                                                                                         |
| <b>Gomez-Restrepo 2018</b> <ul style="list-style-type: none"> <li>• Funding: Yes</li> <li>• Ethics: Yes</li> </ul> | <ul style="list-style-type: none"> <li>• Design: Cross-sectional</li> <li>• Conflict: Colombian Conflict (1975-2015)</li> <li>• Jurisdiction: National</li> <li>• Setting: Community</li> <li>• Exposure: Exposed to specific armed conflict events</li> </ul> | <ul style="list-style-type: none"> <li>• Study year: 2015</li> <li>• Sample size: 10764</li> <li>• Age: 18+ years</li> <li>• % Male: 40</li> <li>• Time between exposure and outcome: 40 years</li> <li>• NOS Score: 2 <ul style="list-style-type: none"> <li>- Selection: 1</li> <li>- Comparability: 0</li> <li>- Outcome: 1</li> </ul> </li> </ul>      | <ul style="list-style-type: none"> <li>• Outcome: Essential (primary) hypertension (I10)</li> <li>• Measured: Self-reported</li> <li>• Epidemiological measure: Relative risk</li> <li>• Effect estimate and direction (recalculated): 1.25 (95% CI 1.23 to 1.27);<br/>Increase</li> <li>• Outcome: Complications and ill-defined descriptions of heart disease (I51)</li> <li>• Measured: Self-reported</li> <li>• Epidemiological measure: Relative risk</li> <li>• Effect estimate and direction (recalculated): 1.50 (95% CI 1.40 to 1.60)<br/>Increase</li> </ul> |

| Cardiovascular Diseases (I00-I59, I70-I99)                                                                                |                                                                                                                                                                                                                                      |                                                                                                                                                                                                                                                                                                                                                      |                                                                                                                                                                                                                                                                                                                                |
|---------------------------------------------------------------------------------------------------------------------------|--------------------------------------------------------------------------------------------------------------------------------------------------------------------------------------------------------------------------------------|------------------------------------------------------------------------------------------------------------------------------------------------------------------------------------------------------------------------------------------------------------------------------------------------------------------------------------------------------|--------------------------------------------------------------------------------------------------------------------------------------------------------------------------------------------------------------------------------------------------------------------------------------------------------------------------------|
| Author, funding, ethics                                                                                                   | Study design and setting                                                                                                                                                                                                             | Study characteristics                                                                                                                                                                                                                                                                                                                                | Outcome                                                                                                                                                                                                                                                                                                                        |
| <b>Hagopian 2013</b> <ul style="list-style-type: none"> <li>Funding: No</li> <li>Ethics: Yes</li> </ul>                   | <ul style="list-style-type: none"> <li>Design: Cross-sectional</li> <li>Conflict: Iraq War (2003-2011)</li> <li>Jurisdiction: National</li> <li>Setting: Community</li> <li>Exposure: Uniform</li> </ul>                             | <ul style="list-style-type: none"> <li>Study year: 2001-2011</li> <li>Sample size: 35835</li> <li>Age: Not reported</li> <li>% Male: Not reported</li> <li>Time between exposure and outcome: 9 years</li> <li>NOS Score: 5 <ul style="list-style-type: none"> <li>Selection: 4</li> <li>Comparability: 0</li> <li>Outcome: 1</li> </ul> </li> </ul> | <ul style="list-style-type: none"> <li>Outcome: Complications and ill-defined descriptions of heart disease (I51) - Mortality</li> <li>Measured: Self-reported</li> <li>Epidemiological measure: Incidence</li> <li>Effect estimate and direction (recalculated): 17.8 (95% CI 3.1 to 32.5); Increase</li> </ul>               |
| <b>Hult 2010</b> <ul style="list-style-type: none"> <li>Funding: Yes</li> <li>Ethics: Yes</li> </ul>                      | <ul style="list-style-type: none"> <li>Design: Cohort</li> <li>Conflict: Nigerian Civil War (1967-1970)</li> <li>Jurisdiction: Subnational</li> <li>Setting: Community</li> <li>Exposure: Time of birth</li> </ul>                   | <ul style="list-style-type: none"> <li>Study year: 2009</li> <li>Sample size: 1166</li> <li>Age: 37-43 years</li> <li>% Male: 68</li> <li>Time between exposure and outcome: 42 years</li> <li>NOS Score: 6 <ul style="list-style-type: none"> <li>Selection: 2</li> <li>Comparability: 2</li> <li>Outcome: 2</li> </ul> </li> </ul>                 | <ul style="list-style-type: none"> <li>Outcome: Essential (primary) hypertension (I10)</li> <li>Measured: SBP<math>\geq</math>160 and DBP<math>\geq</math>100 mmHg</li> <li>Epidemiological measure: Adjusted odds ratio</li> <li>Effect estimate and direction (as reported): 1.91 (95% CI 1.12 to 3.29); Increase</li> </ul> |
| <b>Islam 2017</b> <ul style="list-style-type: none"> <li>Funding: Not reported</li> <li>Ethics: Not reported</li> </ul>   | <ul style="list-style-type: none"> <li>Design: Cross-sectional</li> <li>Conflict: China's Cultural Revolution (1966-1968)</li> <li>Jurisdiction: Subnational</li> <li>Setting: Community</li> <li>Exposure: Time of birth</li> </ul> | <ul style="list-style-type: none"> <li>Study year: 2008</li> <li>Sample size: 1944</li> <li>Age: 59 years</li> <li>% Male: 48</li> <li>Time between exposure and outcome: 42 years</li> <li>NOS Score: 6 <ul style="list-style-type: none"> <li>Selection: 2</li> <li>Comparability: 2</li> <li>Outcome: 2</li> </ul> </li> </ul>                    | <ul style="list-style-type: none"> <li>Outcome: Essential (primary) hypertension (I10)</li> <li>Measured: Measured three times with the average taken</li> <li>Epidemiological measure: Adjusted beta coefficient</li> <li>Effect estimate and direction (as reported): 0.24 (95% CI 0.08 to 0.40); Increase</li> </ul>        |
| <b>Kadojic 1999</b> <ul style="list-style-type: none"> <li>Funding: Not reported</li> <li>Ethics: Not reported</li> </ul> | <ul style="list-style-type: none"> <li>Design: Case-control</li> <li>Conflict: Croatian War of Independence (1991 to 1995)</li> <li>Jurisdiction: Camp</li> <li>Setting: Community</li> </ul>                                        | <ul style="list-style-type: none"> <li>Study year: Not reported</li> <li>Sample size: 240</li> <li>Age: 47 years</li> <li>% Male: 42</li> </ul>                                                                                                                                                                                                      | <ul style="list-style-type: none"> <li>Outcome: Essential (primary) hypertension (I10)</li> <li>Measured: At least three high readings in the past three months (&gt;160/95mmHg)</li> <li>Epidemiological measure: Relative risk</li> </ul>                                                                                    |

| Cardiovascular Diseases (I00-I59, I70-I99)                                                                      |                                                                                                                                                                                                             |                                                                                                                                                                                                                                                                                                                                                                    |                                                                                                                                                                                                                                                                                                                                                                                                                                                                                                                                                                                                                                                                                                                                                                            |
|-----------------------------------------------------------------------------------------------------------------|-------------------------------------------------------------------------------------------------------------------------------------------------------------------------------------------------------------|--------------------------------------------------------------------------------------------------------------------------------------------------------------------------------------------------------------------------------------------------------------------------------------------------------------------------------------------------------------------|----------------------------------------------------------------------------------------------------------------------------------------------------------------------------------------------------------------------------------------------------------------------------------------------------------------------------------------------------------------------------------------------------------------------------------------------------------------------------------------------------------------------------------------------------------------------------------------------------------------------------------------------------------------------------------------------------------------------------------------------------------------------------|
| Author, funding, ethics                                                                                         | Study design and setting                                                                                                                                                                                    | Study characteristics                                                                                                                                                                                                                                                                                                                                              | Outcome                                                                                                                                                                                                                                                                                                                                                                                                                                                                                                                                                                                                                                                                                                                                                                    |
|                                                                                                                 | <ul style="list-style-type: none"> <li>Exposure: PTSD</li> </ul>                                                                                                                                            | <ul style="list-style-type: none"> <li>Time between exposure and outcome: 7 years</li> <li>NOS Score: 7 <ul style="list-style-type: none"> <li>Selection: 3</li> <li>Comparability: 2</li> <li>Outcome: 2</li> </ul> </li> </ul>                                                                                                                                   | <ul style="list-style-type: none"> <li>Effect estimate and direction (recalculated): 1.54 (95% CI 1.46 to 1.63); Increase</li> <li>Outcome: Other cardiac arrhythmias (I49)</li> <li>Measured: Auscultatory, ECG or cardiologist's data indication</li> <li>Epidemiological measure: Relative risk</li> <li>Effect estimate and direction (recalculated): 1.33 (95% CI 0.54 to 3.29); No change</li> </ul>                                                                                                                                                                                                                                                                                                                                                                 |
| <b>Koupil 2007</b> <ul style="list-style-type: none"> <li>Funding: Yes</li> <li>Ethics: Not reported</li> </ul> | <ul style="list-style-type: none"> <li>Design: Cohort</li> <li>Conflict: Siege of Leningrad (1941-1944)</li> <li>Jurisdiction: City</li> <li>Setting: Community</li> <li>Exposure: Time of birth</li> </ul> | <ul style="list-style-type: none"> <li>Study year: 1975-1977 (men); 1980-1982 (women)</li> <li>Sample size: 5636</li> <li>Age: 42-72 years</li> <li>% Male: 70</li> <li>Time between exposure and outcome: 41 years</li> <li>NOS Score: 6 <ul style="list-style-type: none"> <li>Selection: 2</li> <li>Comparability: 2</li> <li>Outcome: 2</li> </ul> </li> </ul> | <ul style="list-style-type: none"> <li>Outcome: Essential (primary) hypertension (I10)</li> <li>Measured: Random zero sphygomanometer. Systolic hypertension 160+mmHg, diastolic hypertension 95+mmHg</li> <li>Epidemiological measure: Adjusted odds ratio</li> <li>Effect estimate and direction (as reported): 1.16 (95% CI 1.02 to 1.32); Increase</li> <li>Outcome: Chronic ischaemic heart disease (I25) – Mortality</li> <li>Measured: Death certificates and additional information from hospitals</li> <li>Epidemiological measure: Adjusted hazard ratios</li> <li>Effect estimate and direction (as reported): 1.11 (95% CI 0.96 to 1.27); No change</li> <li>Outcome: Complications and ill-defined descriptions of heart disease (I51) – Mortality</li> </ul> |

| Cardiovascular Diseases (I00-I59, I70-I99)                                                                                  |                                                                                                                                                                                                                                     |                                                                                                                                                                                                                                                                                                                                        |                                                                                                                                                                                                                                                                                                                                                                                        |
|-----------------------------------------------------------------------------------------------------------------------------|-------------------------------------------------------------------------------------------------------------------------------------------------------------------------------------------------------------------------------------|----------------------------------------------------------------------------------------------------------------------------------------------------------------------------------------------------------------------------------------------------------------------------------------------------------------------------------------|----------------------------------------------------------------------------------------------------------------------------------------------------------------------------------------------------------------------------------------------------------------------------------------------------------------------------------------------------------------------------------------|
| Author, funding, ethics                                                                                                     | Study design and setting                                                                                                                                                                                                            | Study characteristics                                                                                                                                                                                                                                                                                                                  | Outcome                                                                                                                                                                                                                                                                                                                                                                                |
|                                                                                                                             |                                                                                                                                                                                                                                     |                                                                                                                                                                                                                                                                                                                                        | <ul style="list-style-type: none"> <li>Measured: Death certificates and additional information from hospitals</li> <li>Epidemiological measure: Adjusted hazard ratios</li> <li>Effect estimate and direction (as reported): 1.06 (95% CI 0.95 to 1.18);<br/>No change</li> </ul>                                                                                                      |
| <b>Kulenovic 1996</b> <ul style="list-style-type: none"> <li>Funding: Not reported</li> <li>Ethics: Not reported</li> </ul> | <ul style="list-style-type: none"> <li>Design: Ecological</li> <li>Conflict: Bosnian War (1992-1995)</li> <li>Jurisdiction: City</li> <li>Setting: Hospital</li> <li>Exposure: Uniform</li> </ul>                                   | <ul style="list-style-type: none"> <li>Study year: 1994-1995</li> <li>Sample size: 55</li> <li>Age: 33-70 years</li> <li>% Male: 53</li> <li>Time between exposure and outcome: 5 years</li> <li>NOS Score: 1 <ul style="list-style-type: none"> <li>Selection: 0</li> <li>Comparability: 0</li> <li>Outcome: 1</li> </ul> </li> </ul> | <ul style="list-style-type: none"> <li>Outcome: Essential (primary) hypertension (I10)</li> <li>Measured: &gt;140/90 mmHg</li> <li>Epidemiological measure: Relative risk</li> <li>Effect estimate and direction (recalculated): 0.56 (95% CI 0.32 to 0.80);<br/>Decrease</li> </ul>                                                                                                   |
| <b>McEniry 2018</b> <ul style="list-style-type: none"> <li>Funding: Yes</li> <li>Ethics: Not reported</li> </ul>            | <ul style="list-style-type: none"> <li>Design: Cross-sectional</li> <li>Conflict: Colombian Conflict (1975-2015)</li> <li>Jurisdiction: Subnational</li> <li>Setting: Community</li> <li>Exposure: Internal displacement</li> </ul> | <ul style="list-style-type: none"> <li>Study year: 2012</li> <li>Sample size: 1890</li> <li>Age: 70 years</li> <li>% Male: 44</li> <li>Time between exposure and outcome: 37 years</li> <li>NOS Score: 5 <ul style="list-style-type: none"> <li>Selection: 1</li> <li>Comparability: 2</li> <li>Outcome: 2</li> </ul> </li> </ul>      | <ul style="list-style-type: none"> <li>Outcome: Essential (primary) hypertension (I10)</li> <li>Measured: Systolic <math>\geq</math>140mmHg, diastolic <math>\geq</math>90mmHg, or taking medication for hypertension</li> <li>Epidemiological measure: Adjusted odds ratio</li> <li>Effect estimate and direction (as reported): 1.92 (95% CI 0.96 to 3.86);<br/>No change</li> </ul> |
| <b>Mihatov 1995</b> <ul style="list-style-type: none"> <li>Funding: Not reported</li> <li>Ethics: Not reported</li> </ul>   | <ul style="list-style-type: none"> <li>Design: Ecological</li> <li>Conflict: Croatian War of Independence (1991 to 1995))</li> <li>Jurisdiction: City</li> <li>Setting: Hospital</li> <li>Exposure: Uniform</li> </ul>              | <ul style="list-style-type: none"> <li>Study year: 1989-1991</li> <li>Sample size: 2903</li> <li>Age: Not reported</li> <li>% Male: Not reported</li> <li>Time between exposure and outcome: 2 years</li> <li>NOS Score: 0</li> </ul>                                                                                                  | <ul style="list-style-type: none"> <li>Outcome: Acute myocardial infarction (I21)</li> <li>Measured: Unclear</li> <li>Epidemiological measure: Incidence</li> <li>Effect estimate and direction (recalculated): 10.5 (95% CI -8.5 to 29.5);<br/>No change</li> </ul>                                                                                                                   |

| Cardiovascular Diseases (I00-I59, I70-I99)                                                                                    |                                                                                                                                                                                                                                         |                                                                                                                                                                                                                                                                                                                                                                                     |                                                                                                                                                                                                                                                                                                                                                                                                                                                                                                                           |
|-------------------------------------------------------------------------------------------------------------------------------|-----------------------------------------------------------------------------------------------------------------------------------------------------------------------------------------------------------------------------------------|-------------------------------------------------------------------------------------------------------------------------------------------------------------------------------------------------------------------------------------------------------------------------------------------------------------------------------------------------------------------------------------|---------------------------------------------------------------------------------------------------------------------------------------------------------------------------------------------------------------------------------------------------------------------------------------------------------------------------------------------------------------------------------------------------------------------------------------------------------------------------------------------------------------------------|
| Author, funding, ethics                                                                                                       | Study design and setting                                                                                                                                                                                                                | Study characteristics                                                                                                                                                                                                                                                                                                                                                               | Outcome                                                                                                                                                                                                                                                                                                                                                                                                                                                                                                                   |
|                                                                                                                               |                                                                                                                                                                                                                                         | <ul style="list-style-type: none"> <li>- Selection: 0</li> <li>- Comparability: 0</li> <li>- Outcome: 0</li> </ul>                                                                                                                                                                                                                                                                  | <ul style="list-style-type: none"> <li>• Outcome: Acute myocardial infarction (I21) - Mortality</li> <li>• Measured: Unclear</li> <li>• Epidemiological measure: Incidence</li> <li>• Effect estimate and direction (recalculated): 7.5 (95% CI -1.4 to 16.4);<br/>No change</li> <li>• Outcome: Angina pectoris (I20) - Mortality</li> <li>• Measured: Unclear</li> <li>• Epidemiological measure: Incidence</li> <li>• Effect estimate and direction (recalculated): 0.5 (95% CI -4.9 to 5.9);<br/>No change</li> </ul> |
| <b>Mihatov 1995</b> <ul style="list-style-type: none"> <li>• Funding: Not reported</li> <li>• Ethics: Not reported</li> </ul> | <ul style="list-style-type: none"> <li>• Design: Ecological</li> <li>• Conflict: Croatian War of Independence (1991 to 1995))</li> <li>• Jurisdiction: City</li> <li>• Setting: Hospital</li> <li>• Exposure: Uniform</li> </ul>        | <ul style="list-style-type: none"> <li>• Study year: 1989-1991</li> <li>• Sample size: 2903</li> <li>• Age: Not reported</li> <li>• % Male: Not reported</li> <li>• Time between exposure and outcome: 2 years</li> <li>• NOS Score: 1 <ul style="list-style-type: none"> <li>- Selection: 1</li> <li>- Comparability: 0</li> <li>- Outcome: 0</li> </ul> </li> </ul>               | <ul style="list-style-type: none"> <li>• Outcome: Angina pectoris (I20)</li> <li>• Measured: Unclear</li> <li>• Epidemiological measure: Incidence</li> <li>• Effect estimate and direction (recalculated): -8.5 (95% CI -29.3 to 12.3);<br/>No change</li> </ul>                                                                                                                                                                                                                                                         |
| <b>Miric 2001</b> <ul style="list-style-type: none"> <li>• Funding: Not reported</li> <li>• Ethics: Not reported</li> </ul>   | <ul style="list-style-type: none"> <li>• Design: Ecological</li> <li>• Conflict: Croatian War of Independence (1991 to 1995))</li> <li>• Jurisdiction: Subnational</li> <li>• Setting: Hospital</li> <li>• Exposure: Uniform</li> </ul> | <ul style="list-style-type: none"> <li>• Study year: 1987-1997</li> <li>• Sample size: 3454</li> <li>• Age: 59 years (males), 69 years (females)</li> <li>• % Male: 71</li> <li>• Time between exposure and outcome: 6 years</li> <li>• NOS Score: 1 <ul style="list-style-type: none"> <li>- Selection: 0</li> <li>- Comparability: 0</li> <li>- Outcome: 1</li> </ul> </li> </ul> | <ul style="list-style-type: none"> <li>• Outcome: Acute myocardial infarction (I21)</li> <li>• Measured: Two of three criteria: 1. Chest pain &gt;30 mins duration; 2. ECG; 3. Enzymes</li> <li>• Epidemiological measure: Incidence</li> <li>• Effect estimate and direction (recalculated): <ul style="list-style-type: none"> <li>- Pre- vs. during conflict: 71.7 (95% CI 17.8 to 125.5);<br/>Increase</li> <li>- Pre- vs. post conflict: 47.7 (95% CI -5.3 to 100.6);<br/>No change</li> </ul> </li> </ul>           |

| Cardiovascular Diseases (I00-I59, I70-I99) |                                                                                                                                                                                                                       |                                                                                                                                                                                                                                                                                                                                                               |                                                                                                                                                                                                                                                                                                                                                                                                                                                                                                                                                                                     |
|--------------------------------------------|-----------------------------------------------------------------------------------------------------------------------------------------------------------------------------------------------------------------------|---------------------------------------------------------------------------------------------------------------------------------------------------------------------------------------------------------------------------------------------------------------------------------------------------------------------------------------------------------------|-------------------------------------------------------------------------------------------------------------------------------------------------------------------------------------------------------------------------------------------------------------------------------------------------------------------------------------------------------------------------------------------------------------------------------------------------------------------------------------------------------------------------------------------------------------------------------------|
| Author, funding, ethics                    | Study design and setting                                                                                                                                                                                              | Study characteristics                                                                                                                                                                                                                                                                                                                                         | Outcome                                                                                                                                                                                                                                                                                                                                                                                                                                                                                                                                                                             |
|                                            |                                                                                                                                                                                                                       |                                                                                                                                                                                                                                                                                                                                                               | - During- vs. post conflict:<br>-24.0 (95% CI -79.5 to 31.5);<br>No change                                                                                                                                                                                                                                                                                                                                                                                                                                                                                                          |
| <b>Roberts 2004</b>                        | <ul style="list-style-type: none"> <li>• Design: Cross-sectional</li> <li>• Conflict: Iraq War (2003-2011)</li> <li>• Jurisdiction: National</li> <li>• Setting: Community</li> <li>• Exposure: Uniform</li> </ul>    | <ul style="list-style-type: none"> <li>• Study year: 2004</li> <li>• Sample size: 7868</li> <li>• Age: All ages</li> <li>• % Male: 50</li> <li>• Time between exposure and outcome: 1 year</li> <li>• NOS Score: 3 <ul style="list-style-type: none"> <li>- Selection: 0</li> <li>- Comparability: 0</li> <li>- Outcome: 0</li> </ul> </li> </ul>             | <ul style="list-style-type: none"> <li>• Outcome: Complications and ill-defined descriptions of heart disease (I51) - Mortality</li> <li>• Measured: Self-reported</li> <li>• Epidemiological measure: Relative risk</li> <li>• Effect estimate and direction (recalculated): 1.55 (95% CI 1.35 to 1.75); Increase</li> </ul>                                                                                                                                                                                                                                                       |
| <b>Rotar 2015</b>                          | <ul style="list-style-type: none"> <li>• Design: Cohort</li> <li>• Conflict: Siege of Leningrad (1941-1944)</li> <li>• Jurisdiction: City</li> <li>• Setting: Community</li> <li>• Exposure: Time of birth</li> </ul> | <ul style="list-style-type: none"> <li>• Study year: 2009-2011</li> <li>• Sample size: 356</li> <li>• Age: 65-82 years</li> <li>• % Male: 27-33</li> <li>• Time between exposure and outcome: 70 years</li> <li>• NOS Score: 5 <ul style="list-style-type: none"> <li>- Selection: 3</li> <li>- Comparability: 1</li> <li>- Outcome: 1</li> </ul> </li> </ul> | <ul style="list-style-type: none"> <li>• Outcome: Essential (primary) hypertension (I10)</li> <li>• Measured: Self-reported, examination during visit and medical records</li> <li>• Epidemiological measure: Relative risk</li> <li>• Effect estimate and direction (recalculated): 1.03 (95% CI 0.43 to 2.45); No change</li> <li>• Outcome: Chronic ischaemic heart disease (I25)</li> <li>• Measured: History of MI</li> <li>• Epidemiological measure: Relative risk</li> <li>• Effect estimate and direction (recalculated): 0.89 (95% CI 0.35 to 2.25); No change</li> </ul> |

| Cardiovascular Diseases (I00-I59, I70-I99)                                                                                 |                                                                                                                                                                                                                                           |                                                                                                                                                                                                                                                                                                                                                     |                                                                                                                                                                                                                                                                                                                                                        |
|----------------------------------------------------------------------------------------------------------------------------|-------------------------------------------------------------------------------------------------------------------------------------------------------------------------------------------------------------------------------------------|-----------------------------------------------------------------------------------------------------------------------------------------------------------------------------------------------------------------------------------------------------------------------------------------------------------------------------------------------------|--------------------------------------------------------------------------------------------------------------------------------------------------------------------------------------------------------------------------------------------------------------------------------------------------------------------------------------------------------|
| Author, funding, ethics                                                                                                    | Study design and setting                                                                                                                                                                                                                  | Study characteristics                                                                                                                                                                                                                                                                                                                               | Outcome                                                                                                                                                                                                                                                                                                                                                |
| <b>Rumboldt 1993</b> <ul style="list-style-type: none"> <li>Funding: Not reported</li> <li>Ethics: Not reported</li> </ul> | <ul style="list-style-type: none"> <li>Design: Ecological</li> <li>Conflict: Croatian War of Independence (1991 to 1995))</li> <li>Jurisdiction: City</li> <li>Setting: Hospital</li> <li>Exposure: Uniform</li> </ul>                    | <ul style="list-style-type: none"> <li>Study year: 1990-1992</li> <li>Sample size: 1833</li> <li>Age: Not reported</li> <li>% Male: Not reported</li> <li>Time between exposure and outcome: 2 years</li> <li>NOS Score: 1 <ul style="list-style-type: none"> <li>Selection: 0</li> <li>Comparability: 0</li> <li>Outcome: 1</li> </ul> </li> </ul> | <ul style="list-style-type: none"> <li>Outcome: Acute myocardial infarction (I21)</li> <li>Measured: Emergency admission diagnosis</li> <li>Epidemiological measure: Incidence</li> <li>Effect estimate and direction (recalculated): -6.5 (95% CI -28.1 to 15.1);<br/>No change</li> </ul>                                                            |
| <b>Santic 2006</b> <ul style="list-style-type: none"> <li>Funding: Not reported</li> <li>Ethics: Not reported</li> </ul>   | <ul style="list-style-type: none"> <li>Design: Cohort</li> <li>Conflict: Bosnian War (1992-1995)</li> <li>Jurisdiction: Subnational</li> <li>Setting: Community</li> <li>Exposure: Loss of family member during armed conflict</li> </ul> | <ul style="list-style-type: none"> <li>Study year: 1996 and 2003</li> <li>Sample size: 1726</li> <li>Age: 50-52 years</li> <li>% Male: 71</li> <li>Time between exposure and outcome: 11 years</li> <li>NOS Score: 2 <ul style="list-style-type: none"> <li>Selection: 1</li> <li>Comparability: 0</li> <li>Outcome: 1</li> </ul> </li> </ul>       | <ul style="list-style-type: none"> <li>Outcome: Essential (primary) hypertension (I10)</li> <li>Measured: &gt;140 mmHg systolic or &gt;90 mmHg diastolic or taking antihypertensive therapy</li> <li>Epidemiological measure: Relative risk</li> <li>Effect estimate and direction (recalculated): 1.42 (95% CI 1.32 to 1.52);<br/>Increase</li> </ul> |
| <b>Sibai 1989</b> <ul style="list-style-type: none"> <li>Funding: Not reported</li> <li>Ethics: Not reported</li> </ul>    | <ul style="list-style-type: none"> <li>Design: Cohor</li> <li>Conflict: Lebanese Civil War (1975-1991)</li> <li>Jurisdiction: City</li> <li>Setting: Hospital</li> <li>Exposure: Exposed to specific armed conflict events</li> </ul>     | <ul style="list-style-type: none"> <li>Study year: 1986</li> <li>Sample size: 167</li> <li>Age: 35-75 years</li> <li>% Male: 79</li> <li>Time between exposure and outcome: 11 year</li> <li>NOS Score: 8 <ul style="list-style-type: none"> <li>Selection: 4</li> <li>Comparability: 2</li> <li>Outcome: 2</li> </ul> </li> </ul>                  | <ul style="list-style-type: none"> <li>Outcome: Chronic ischaemic heart disease (I25)</li> <li>Measured: Arteriographically confirmed</li> <li>Epidemiological measure: Adjusted odds ratio</li> <li>Effect estimate and direction (as reported): 2.81 (95% CI 1.46 to 5.39);<br/>Increase</li> </ul>                                                  |



**Cardiovascular Diseases (I00-I59, I70-I99)**

| <b>Author, funding, ethics</b>                                                                                   | <b>Study design and setting</b>                                                                                                                                                                                                         | <b>Study characteristics</b>                                                                                                                                                                                                                                                                                                                   | <b>Outcome</b>                                                                                                                                                                                                                                                                                                                                                                                                                                                                                                              |
|------------------------------------------------------------------------------------------------------------------|-----------------------------------------------------------------------------------------------------------------------------------------------------------------------------------------------------------------------------------------|------------------------------------------------------------------------------------------------------------------------------------------------------------------------------------------------------------------------------------------------------------------------------------------------------------------------------------------------|-----------------------------------------------------------------------------------------------------------------------------------------------------------------------------------------------------------------------------------------------------------------------------------------------------------------------------------------------------------------------------------------------------------------------------------------------------------------------------------------------------------------------------|
| <b>Sibai 2001</b> <ul style="list-style-type: none"> <li>Funding: Yes</li> <li>Ethics: Not reported</li> </ul>   | <ul style="list-style-type: none"> <li>Design: Cohort</li> <li>Conflict: Lebanese Civil War (1975-1991)</li> <li>Jurisdiction: City</li> <li>Setting: Community</li> <li>Exposure: Exposed to specific armed conflict events</li> </ul> | <ul style="list-style-type: none"> <li>Study year: 1983 and 1993/4</li> <li>Sample size: 1567</li> <li>Age: 50+ years</li> <li>% Male: 51</li> <li>Time between exposure and outcome: 19 years</li> <li>NOS Score: 4 <ul style="list-style-type: none"> <li>Selection: 3</li> <li>Comparability: 0</li> <li>Outcome: 1</li> </ul> </li> </ul>  | <ul style="list-style-type: none"> <li>Outcome: Complications and ill-defined descriptions of heart disease (I51)</li> <li>Measured: Verbal autopsy by next of kin</li> <li>Epidemiological measure: Relative risk</li> <li>Effect estimate and direction (as reported): 1.34 (95% CI 1.23 to 1.47); Increase</li> </ul>                                                                                                                                                                                                    |
| <b>Sparen 2004</b> <ul style="list-style-type: none"> <li>Funding: Yes</li> <li>Ethics: Not reported</li> </ul>  | <ul style="list-style-type: none"> <li>Design: Cohort</li> <li>Conflict: Siege of Leningrad (1941-1944)</li> <li>Jurisdiction: City</li> <li>Setting: Community</li> <li>Exposure: Time of birth</li> </ul>                             | <ul style="list-style-type: none"> <li>Study year: 1975 to 1999</li> <li>Sample size: 3905</li> <li>Age: Not reported</li> <li>% Male: 100</li> <li>Time between exposure and outcome: 58 years</li> <li>NOS Score: 6 <ul style="list-style-type: none"> <li>Selection: 3</li> <li>Comparability: 2</li> <li>Outcome: 1</li> </ul> </li> </ul> | <ul style="list-style-type: none"> <li>Outcome: Chronic ischaemic heart disease (I25) – Mortality</li> <li>Measured: Not reported</li> <li>Epidemiological measure: Relative risk</li> <li>Effect estimate and direction (as reported): 1.19 (95% CI 1.00 to 1.41); Increase</li> <li>Outcome: Chronic ischaemic heart disease (I25)</li> <li>Measured: Not reported</li> <li>Epidemiological measure: Relative risk</li> <li>Effect estimate and direction (as reported): 1.07 (95% CI 0.88 to 1.29); No change</li> </ul> |
| <b>Stanner 2001</b> <ul style="list-style-type: none"> <li>Funding: Yes</li> <li>Ethics: Not reported</li> </ul> | <ul style="list-style-type: none"> <li>Design: Cohort</li> <li>Conflict: Siege of Leningrad (1941-1944)</li> <li>Jurisdiction: City</li> <li>Setting: Hospital</li> <li>Exposure: Time of birth</li> </ul>                              | <ul style="list-style-type: none"> <li>Study year: Not reported</li> <li>Sample size: 549</li> <li>Age: 53 years</li> <li>% Male: 27</li> <li>Time between exposure and outcome: 59 years</li> <li>NOS Score: 4 <ul style="list-style-type: none"> <li>Selection: 3</li> <li>Comparability: 0</li> </ul> </li> </ul>                           | <ul style="list-style-type: none"> <li>Outcome: Chronic ischaemic heart disease (I25)</li> <li>Measured: ECG abnormalities</li> <li>Epidemiological measure: Relative risk</li> <li>Effect estimate and direction (recalculated): 1.36 (95% CI 0.36 to 5.18); No change</li> <li>Outcome: Angina pectoris (I20)</li> </ul>                                                                                                                                                                                                  |

| Cardiovascular Diseases (I00-I59, I70-I99)                                                                                |                                                                                                                                                                                                                                             |                                                                                                                                                                                                                                                                                                                                                    |                                                                                                                                                                                                                                                                                                                                                                                                                                                                                                        |
|---------------------------------------------------------------------------------------------------------------------------|---------------------------------------------------------------------------------------------------------------------------------------------------------------------------------------------------------------------------------------------|----------------------------------------------------------------------------------------------------------------------------------------------------------------------------------------------------------------------------------------------------------------------------------------------------------------------------------------------------|--------------------------------------------------------------------------------------------------------------------------------------------------------------------------------------------------------------------------------------------------------------------------------------------------------------------------------------------------------------------------------------------------------------------------------------------------------------------------------------------------------|
| Author, funding, ethics                                                                                                   | Study design and setting                                                                                                                                                                                                                    | Study characteristics                                                                                                                                                                                                                                                                                                                              | Outcome                                                                                                                                                                                                                                                                                                                                                                                                                                                                                                |
|                                                                                                                           |                                                                                                                                                                                                                                             | - Outcome: 1                                                                                                                                                                                                                                                                                                                                       | <ul style="list-style-type: none"> <li>Measured: Self-reported</li> <li>Epidemiological measure: Relative risk</li> <li>Effect estimate and direction (recalculated): 1.57 (95% CI 1.03 to 2.40); Increase</li> <li>Outcome: Complications and ill-defined descriptions of heart disease (I51)</li> <li>Measured: ECG or questionnaire combined</li> <li>Epidemiological measure: Relative risk</li> <li>Effect estimate and direction (recalculated): 1.26 (95% CI 1.21 to 1.30); Increase</li> </ul> |
| <b>Tomic 2009</b> <ul style="list-style-type: none"> <li>Funding: Not reported</li> <li>Ethics: Not reported</li> </ul>   | <ul style="list-style-type: none"> <li>Design: Case-control</li> <li>Conflict: Bosnian War (1992-1995)</li> <li>Jurisdiction: City</li> <li>Setting: Hospital</li> <li>Exposure: Uniform</li> </ul>                                         | <ul style="list-style-type: none"> <li>Study year: 1995-1999</li> <li>Sample size: 542</li> <li>Age: Not reported</li> <li>% Male: Not reported</li> <li>Time between exposure and outcome: 7 years</li> <li>NOS Score: 5 <ul style="list-style-type: none"> <li>Selection: 3</li> <li>Comparability: 0</li> <li>Outcome: 2</li> </ul> </li> </ul> | <ul style="list-style-type: none"> <li>Outcome: Essential (primary) hypertension (I10)</li> <li>Measured: Criteria of Working Group of the National High Blood Pressure Education Program</li> <li>Epidemiological measure: Relative risk</li> <li>Effect estimate and direction (recalculated): 0.58 (95% CI 0.19 to 1.80); No change</li> </ul>                                                                                                                                                      |
| <b>Torinek 2005</b> <ul style="list-style-type: none"> <li>Funding: Not reported</li> <li>Ethics: Not reported</li> </ul> | <ul style="list-style-type: none"> <li>Design: Cross-sectional</li> <li>Conflict: Croatian War of Independence (1991 to 1995)</li> <li>Jurisdiction: Village</li> <li>Setting: Hospital</li> <li>Exposure: Internal displacement</li> </ul> | <ul style="list-style-type: none"> <li>Study year: 2003</li> <li>Sample size: 497</li> <li>Age: 45+</li> <li>% Male: Not reported</li> <li>Time between exposure and outcome: 12 years</li> <li>NOS Score: 4 <ul style="list-style-type: none"> <li>Selection: 3</li> <li>Comparability: 0</li> <li>Outcome: 1</li> </ul> </li> </ul>              | <ul style="list-style-type: none"> <li>Outcome: Complications and ill-defined descriptions of heart disease (I51)</li> <li>Measured: Primary care record</li> <li>Epidemiological measure: Relative risk</li> <li>Effect estimate and direction (recalculated): 1.14 (95% CI 0.64 to 2.03); No change</li> <li>Outcome: Cardiomyopathy (I42)</li> <li>Measured: Primary care record</li> <li>Epidemiological measure: Relative risk</li> </ul>                                                         |

| Cardiovascular Diseases (I00-I59, I70-I99)                                                                                   |                                                                                                                                                                                                             |                                                                                                                                                                                                                                                                                                                                                                     |                                                                                                                                                                                                                                                                                                                                                                           |
|------------------------------------------------------------------------------------------------------------------------------|-------------------------------------------------------------------------------------------------------------------------------------------------------------------------------------------------------------|---------------------------------------------------------------------------------------------------------------------------------------------------------------------------------------------------------------------------------------------------------------------------------------------------------------------------------------------------------------------|---------------------------------------------------------------------------------------------------------------------------------------------------------------------------------------------------------------------------------------------------------------------------------------------------------------------------------------------------------------------------|
| Author, funding, ethics                                                                                                      | Study design and setting                                                                                                                                                                                    | Study characteristics                                                                                                                                                                                                                                                                                                                                               | Outcome                                                                                                                                                                                                                                                                                                                                                                   |
|                                                                                                                              |                                                                                                                                                                                                             |                                                                                                                                                                                                                                                                                                                                                                     | <ul style="list-style-type: none"> <li>Effect estimate and direction (recalculated): 1.12 (95% CI 1.04 to 1.19)<br/>Increase</li> <li>Outcome: Essential (primary) hypertension (I10)</li> <li>Measured: Primary care record</li> <li>Epidemiological measure: Relative risk</li> <li>Effect estimate and direction: 1.04 (95% CI 0.70 to 1.54);<br/>No change</li> </ul> |
| <b>Vagero 2013</b> <ul style="list-style-type: none"> <li>Funding: Yes</li> <li>Ethics: Yes</li> </ul>                       | <ul style="list-style-type: none"> <li>Design: Cohort</li> <li>Conflict: Siege of Leningrad (1941-1944)</li> <li>Jurisdiction: City</li> <li>Setting: Community</li> <li>Exposure: Time of birth</li> </ul> | <ul style="list-style-type: none"> <li>Study year: 1975-1977 (men); 1980-1982 (women)</li> <li>Sample size: 5327</li> <li>Age: Not reported</li> <li>% Male: 73</li> <li>Time between exposure and outcome: 36 years</li> <li>NOS Score: 3 <ul style="list-style-type: none"> <li>Selection: 2</li> <li>Comparability: 0</li> <li>Outcome: 1</li> </ul> </li> </ul> | <ul style="list-style-type: none"> <li>Outcome: Chronic ischaemic heart disease (I25) – Mortality</li> <li>Measured: Death certificates coded by Russian physicians using ICD-8</li> <li>Epidemiological measure: Relative risk</li> <li>Effect estimate and direction (as reported): 1.20 (95% CI 1.06 to 1.36);<br/>Increase</li> </ul>                                 |
| <b>Vajtskjold 2016</b> <ul style="list-style-type: none"> <li>Funding: Not reported</li> <li>Ethics: Not reported</li> </ul> | <ul style="list-style-type: none"> <li>Design: Ecological</li> <li>Conflict: Israel-Gaza War (2014)</li> <li>Jurisdiction: National</li> <li>Setting: Hospital</li> <li>Exposure: Uniform</li> </ul>        | <ul style="list-style-type: none"> <li>Study year: 2014</li> <li>Sample size: 1241</li> <li>Age: 52 years</li> <li>% Male: 50</li> <li>Time between exposure and outcome: 1 years</li> <li>NOS Score: 4 <ul style="list-style-type: none"> <li>Selection: 3</li> <li>Comparability: 0</li> <li>Outcome: 1</li> </ul> </li> </ul>                                    | <ul style="list-style-type: none"> <li>Outcome: Complications and ill-defined descriptions of heart disease (I51) – Mortality</li> <li>Measured: Death notification forms</li> <li>Epidemiological measure: Relative risk</li> <li>Effect estimate and direction (recalculated): 1.27 (95% CI 1.04 to 1.55);<br/>Increase</li> </ul>                                      |

| Cardiovascular Diseases (I00-I59, I70-I99)                                                                                |                                                                                                                                                                                                          |                                                                                                                                                                                                                                                                                                                                           |                                                                                                                                                                                                                                                                                                                                                                                                                                                                                                                                                                                                                                        |
|---------------------------------------------------------------------------------------------------------------------------|----------------------------------------------------------------------------------------------------------------------------------------------------------------------------------------------------------|-------------------------------------------------------------------------------------------------------------------------------------------------------------------------------------------------------------------------------------------------------------------------------------------------------------------------------------------|----------------------------------------------------------------------------------------------------------------------------------------------------------------------------------------------------------------------------------------------------------------------------------------------------------------------------------------------------------------------------------------------------------------------------------------------------------------------------------------------------------------------------------------------------------------------------------------------------------------------------------------|
| Author, funding, ethics                                                                                                   | Study design and setting                                                                                                                                                                                 | Study characteristics                                                                                                                                                                                                                                                                                                                     | Outcome                                                                                                                                                                                                                                                                                                                                                                                                                                                                                                                                                                                                                                |
| <b>Vasilj 2006A</b> <ul style="list-style-type: none"> <li>Funding: Not reported</li> <li>Ethics: Not reported</li> </ul> | <ul style="list-style-type: none"> <li>Design: Ecological</li> <li>Conflict: Bosnian War (1992-1995)</li> <li>Jurisdiction: Subnational</li> <li>Setting: Hospital</li> <li>Exposure: Uniform</li> </ul> | <ul style="list-style-type: none"> <li>Study year: 1987-2001</li> <li>Sample size: 2022</li> <li>Age: Not reported</li> <li>% Male: 65</li> <li>Time between exposure and outcome: 9 years</li> <li>NOS Score: 1 <ul style="list-style-type: none"> <li>Selection: 0</li> <li>Comparability: 0</li> <li>Outcome: 1</li> </ul> </li> </ul> | <ul style="list-style-type: none"> <li>Outcome: Other acute ischaemic heart diseases (I24)</li> <li>Measured: Category I20, 21, 22 - X revision ICD) - acute myocardial infarction (with or without ST elevation), and unstable angina pectoris</li> <li>Epidemiological measure: Incidence</li> <li>Effect estimate and direction (recalculated): <ul style="list-style-type: none"> <li>Pre- vs. during conflict: 151.0 (95% CI 83.7 to 218.3); Increase</li> <li>Pre- vs. post conflict: 329.0 (95% CI 256.8 to 401.2); Increase</li> <li>During- vs. post conflict: 178.0 (95% CI 101.9 to 254.1); Increase</li> </ul> </li> </ul> |
| <b>Vasilj 2006B</b> <ul style="list-style-type: none"> <li>Funding: Not reported</li> <li>Ethics: Not reported</li> </ul> | <ul style="list-style-type: none"> <li>Design: Ecological</li> <li>Conflict: Bosnian War (1992-1995)</li> <li>Jurisdiction: Subnational</li> <li>Setting: Hospital</li> <li>Exposure: Uniform</li> </ul> | <ul style="list-style-type: none"> <li>Study year: 1987-2001</li> <li>Sample size: 151</li> <li>Age: Not reported</li> <li>% Male: 52</li> <li>Time between exposure and outcome: 9 years</li> <li>NOS Score: 1 <ul style="list-style-type: none"> <li>Selection: 0</li> <li>Comparability: 0</li> <li>Outcome: 1</li> </ul> </li> </ul>  | <ul style="list-style-type: none"> <li>Outcome: Other acute ischaemic heart diseases (I24) – Mortality</li> <li>Measured: Category I20, 21, 22 - X revision ICD) - acute myocardial infarction (with or without ST elevation), and unstable angina pectoris</li> <li>Epidemiological measure: Relative risk</li> <li>Effect estimate and direction (recalculated): <ul style="list-style-type: none"> <li>Pre- vs. during conflict: 0.89 (95% CI 0.81 to 0.97); Decrease</li> <li>Pre- vs. post conflict: No change</li> <li>During- vs. post conflict: Increase</li> </ul> </li> </ul>                                                |

| Cerebrovascular diseases (I00-I99)                                                                                             |                                                                                                                                                                                                                                                      |                                                                                                                                                                                                                                                                                                                                              |                                                                                                                                                                                                                                                                                                                                                                                                                                                                                                                                                             |
|--------------------------------------------------------------------------------------------------------------------------------|------------------------------------------------------------------------------------------------------------------------------------------------------------------------------------------------------------------------------------------------------|----------------------------------------------------------------------------------------------------------------------------------------------------------------------------------------------------------------------------------------------------------------------------------------------------------------------------------------------|-------------------------------------------------------------------------------------------------------------------------------------------------------------------------------------------------------------------------------------------------------------------------------------------------------------------------------------------------------------------------------------------------------------------------------------------------------------------------------------------------------------------------------------------------------------|
| Author, funding, ethics                                                                                                        | Study design and setting                                                                                                                                                                                                                             | Study characteristics                                                                                                                                                                                                                                                                                                                        | Outcome                                                                                                                                                                                                                                                                                                                                                                                                                                                                                                                                                     |
| <b>Dimitrijevic 2002</b> <ul style="list-style-type: none"> <li>Funding: Not reported</li> <li>Ethics: Not reported</li> </ul> | <ul style="list-style-type: none"> <li>Design: Ecological</li> <li>Conflict: Bosnian War (1992-1995)</li> <li>Jurisdiction: City</li> <li>Setting: Hospital</li> <li>Exposure: Uniform</li> </ul>                                                    | <ul style="list-style-type: none"> <li>Study year: 1990-1999</li> <li>Sample size: 6255</li> <li>Age: Not reported</li> <li>% Male: 48-50</li> <li>Time between exposure and outcome: 5 years</li> <li>NOS Score: 1 <ul style="list-style-type: none"> <li>Selection: 0</li> <li>Comparability: 0</li> <li>Outcome: 1</li> </ul> </li> </ul> | <ul style="list-style-type: none"> <li>Outcome: Stroke, not specified as haemorrhage or infarction (I64)</li> <li>Measured: Clinical picture, blood tests</li> <li>Epidemiological measure: Incidence</li> <li>Effect estimate and direction (recalculated): <ul style="list-style-type: none"> <li>Pre- vs. during conflict: -975.0 (95% CI -1057.2 to -892.8); Decrease</li> <li>Pre- vs. post conflict: 1887.0 (95% CI 1753.8 to 2020.2); Increase</li> <li>During- vs. post conflict: 2862.0 (95% CI 2743.7 to 2980.3); Increase</li> </ul> </li> </ul> |
| <b>Dimitrijevic 2002</b> <ul style="list-style-type: none"> <li>Funding: Not reported</li> <li>Ethics: Not reported</li> </ul> | <ul style="list-style-type: none"> <li>Design: Ecological</li> <li>Conflict: Bosnian War (1992-1995)</li> <li>Jurisdiction: City</li> <li>Setting: Hospital</li> <li>Exposure: Uniform</li> </ul>                                                    | <ul style="list-style-type: none"> <li>Study year: 1990-1999</li> <li>Sample size: 6255</li> <li>Age: Not reported</li> <li>% Male: 48-50</li> <li>Time between exposure and outcome: 5 years</li> <li>NOS Score: 0 <ul style="list-style-type: none"> <li>Selection: 0</li> <li>Comparability: 0</li> <li>Outcome: 0</li> </ul> </li> </ul> | <ul style="list-style-type: none"> <li>Outcome: Stroke, not specified as haemorrhage or infarction (I64) - Mortality</li> <li>Measured: Unclear</li> <li>Epidemiological measure: Relative risk</li> <li>Effect estimate and direction (recalculated): <ul style="list-style-type: none"> <li>Pre- vs. during conflict: 1.4 (95% CI 1.2 to 1.6); Increase</li> <li>Pre- vs. post conflict: Increase</li> <li>During- vs. post conflict: Decrease</li> </ul> </li> </ul>                                                                                     |
| <b>Gomez-Restrepo 2018</b> <ul style="list-style-type: none"> <li>Funding: Yes</li> <li>Ethics: Yes</li> </ul>                 | <ul style="list-style-type: none"> <li>Design: Cross-sectional</li> <li>Conflict: Colombian Conflict (1975-2015)</li> <li>Jurisdiction: National</li> <li>Setting: Community</li> <li>Exposure: Exposed to specific armed conflict events</li> </ul> | <ul style="list-style-type: none"> <li>Study year: 2015</li> <li>Sample size: 10764</li> <li>Age: 18+ years</li> <li>% Male: 40</li> <li>Time between exposure and outcome: 40 years</li> <li>NOS Score: 2 <ul style="list-style-type: none"> <li>Selection: 1</li> <li>Comparability: 0</li> </ul> </li> </ul>                              | <ul style="list-style-type: none"> <li>Outcome: Stroke, not specified as haemorrhage or infarction (I64)</li> <li>Measured: Self-reported</li> <li>Epidemiological measure: Relative risk</li> <li>Effect estimate and direction (recalculated): 2.40 (95% CI 2.04 to 2.76); Increase</li> </ul>                                                                                                                                                                                                                                                            |

| Cerebrovascular diseases (I00-I99)                                                                                            |                                                                                                                                                                                                                                   |                                                                                                                                                                                                                                                                                                                                                                       |                                                                                                                                                                                                                                                                                                                                                         |
|-------------------------------------------------------------------------------------------------------------------------------|-----------------------------------------------------------------------------------------------------------------------------------------------------------------------------------------------------------------------------------|-----------------------------------------------------------------------------------------------------------------------------------------------------------------------------------------------------------------------------------------------------------------------------------------------------------------------------------------------------------------------|---------------------------------------------------------------------------------------------------------------------------------------------------------------------------------------------------------------------------------------------------------------------------------------------------------------------------------------------------------|
| Author, funding, ethics                                                                                                       | Study design and setting                                                                                                                                                                                                          | Study characteristics                                                                                                                                                                                                                                                                                                                                                 | Outcome                                                                                                                                                                                                                                                                                                                                                 |
|                                                                                                                               |                                                                                                                                                                                                                                   | - Outcome: 1                                                                                                                                                                                                                                                                                                                                                          |                                                                                                                                                                                                                                                                                                                                                         |
| <b>Kadojic 1996</b> <ul style="list-style-type: none"> <li>• Funding: Not reported</li> <li>• Ethics: Not reported</li> </ul> | <ul style="list-style-type: none"> <li>• Design: Case-control</li> <li>• Conflict: Croatian War of Independence (1991 to 1995)</li> <li>• Jurisdiction: City</li> <li>• Setting: Hospital</li> <li>• Exposure: Uniform</li> </ul> | <ul style="list-style-type: none"> <li>• Study year: 1990-1992</li> <li>• Sample size: 70</li> <li>• Age: Not reported</li> <li>• % Male: Not reported</li> <li>• Time between exposure and outcome: 1 year</li> <li>• NOS Score: 1 <ul style="list-style-type: none"> <li>- Selection: 0</li> <li>- Comparability: 0</li> <li>- Outcome: 1</li> </ul> </li> </ul>    | <ul style="list-style-type: none"> <li>• Outcome: Intracerebral haemorrhage (I61)</li> <li>• Measured: CAT scan, lumbar puncture, cerebral angiography, and patient records</li> <li>• Epidemiological measure: Relative risk</li> <li>• Effect estimate and direction (recalculated): 1.77 (95% CI 1.04 to 3.00); Increase</li> </ul>                  |
| <b>Kadojic 2002</b> <ul style="list-style-type: none"> <li>• Funding: Not reported</li> <li>• Ethics: Not reported</li> </ul> | <ul style="list-style-type: none"> <li>• Design: Case-control</li> <li>• Conflict: Croatian War of Independence (1991 to 1995)</li> <li>• Jurisdiction: City</li> <li>• Setting: Hospital</li> <li>• Exposure: Uniform</li> </ul> | <ul style="list-style-type: none"> <li>• Study year: 1988-2000</li> <li>• Sample size: 7388</li> <li>• Age: Not reported</li> <li>• % Male: Not reported</li> <li>• Time between exposure and outcome: 7 years</li> <li>• NOS Score: 1 <ul style="list-style-type: none"> <li>- Selection: 0</li> <li>- Comparability: 0</li> <li>- Outcome: 1</li> </ul> </li> </ul> | <ul style="list-style-type: none"> <li>• Outcome: Stroke, not specified as haemorrhage or infarction (I64)</li> <li>• Measured: Case history, diagnostic imaging, and autopsy report</li> <li>• Epidemiological measure: Incidence</li> <li>• Effect estimate and direction (recalculated): -128.2 (95% CI -190.5 to -65.9); Decrease</li> </ul>        |
| <b>Koupil 2007</b> <ul style="list-style-type: none"> <li>• Funding: Yes</li> <li>• Ethics: Not reported</li> </ul>           | <ul style="list-style-type: none"> <li>• Design: Cohort</li> <li>• Conflict: Siege of Leningrad (1941-1944)</li> <li>• Jurisdiction: City</li> <li>• Setting: Community</li> <li>• Exposure: Time of birth</li> </ul>             | <ul style="list-style-type: none"> <li>• Study year: 1975-1977 (men); 1980-1982 (women)</li> <li>• Sample size: 5636</li> <li>• Age: 42-72 years</li> <li>• % Male: 70</li> <li>• Time between exposure and outcome: 41 years</li> <li>• NOS Score: 6 <ul style="list-style-type: none"> <li>- Selection: 2</li> <li>- Comparability: 2</li> </ul> </li> </ul>        | <ul style="list-style-type: none"> <li>• Outcome: Other cerebrovascular diseases (I67) - Mortality</li> <li>• Measured: Death certificates and additional information from hospitals</li> <li>• Epidemiological measure: Adjusted hazard ratio</li> <li>• Effect estimate and direction (as reported): 0.98 (95% CI 0.80 to 1.16); No change</li> </ul> |

| Cerebrovascular diseases (I00-I99)                                                                                          |                                                                                                                                                                                                                                    |                                                                                                                                                                                                                                                                                                                                                                        |                                                                                                                                                                                                                                                                                                                                                                                                                       |
|-----------------------------------------------------------------------------------------------------------------------------|------------------------------------------------------------------------------------------------------------------------------------------------------------------------------------------------------------------------------------|------------------------------------------------------------------------------------------------------------------------------------------------------------------------------------------------------------------------------------------------------------------------------------------------------------------------------------------------------------------------|-----------------------------------------------------------------------------------------------------------------------------------------------------------------------------------------------------------------------------------------------------------------------------------------------------------------------------------------------------------------------------------------------------------------------|
| Author, funding, ethics                                                                                                     | Study design and setting                                                                                                                                                                                                           | Study characteristics                                                                                                                                                                                                                                                                                                                                                  | Outcome                                                                                                                                                                                                                                                                                                                                                                                                               |
|                                                                                                                             |                                                                                                                                                                                                                                    | - Outcome: 2                                                                                                                                                                                                                                                                                                                                                           |                                                                                                                                                                                                                                                                                                                                                                                                                       |
| <b>Lusic 1998</b> <ul style="list-style-type: none"> <li>• Funding: Not reported</li> <li>• Ethics: Not reported</li> </ul> | <ul style="list-style-type: none"> <li>• Design: Cohort</li> <li>• Conflict: Croatian War of Independence (1991 to 1995)</li> <li>• Jurisdiction: Subnational</li> <li>• Setting: Hospital</li> <li>• Exposure: Uniform</li> </ul> | <ul style="list-style-type: none"> <li>• Study year: 1986-1995</li> <li>• Sample size: 10019</li> <li>• Age: Not reported</li> <li>• % Male: Not reported</li> <li>• Time between exposure and outcome: 9 years</li> <li>• NOS Score: 0 <ul style="list-style-type: none"> <li>- Selection: 0</li> <li>- Comparability: 0</li> <li>- Outcome: 0</li> </ul> </li> </ul> | <ul style="list-style-type: none"> <li>• Outcome: Stroke, not specified as haemorrhage or infarction (I64)</li> <li>• Measured: Not reported</li> <li>• Epidemiological measure: Incidence</li> <li>• Effect estimate and direction (recalculated): 174.6 (95% CI 86.9 to 262.3); Increase</li> </ul>                                                                                                                 |
| <b>Rotar 2015</b> <ul style="list-style-type: none"> <li>• Funding: Yes</li> <li>• Ethics: Yes</li> </ul>                   | <ul style="list-style-type: none"> <li>• Design: Cohort</li> <li>• Conflict: Siege of Leningrad (1941-1944)</li> <li>• Jurisdiction: City</li> <li>• Setting: Community</li> <li>• Exposure: Time of birth</li> </ul>              | <ul style="list-style-type: none"> <li>• Study year: 2009-2011</li> <li>• Sample size: 356</li> <li>• Age: 65-82 years</li> <li>• % Male: 27-33</li> <li>• Time between exposure and outcome: 70 years</li> <li>• NOS Score: 5 <ul style="list-style-type: none"> <li>- Selection: 3</li> <li>- Comparability: 1</li> <li>- Outcome: 1</li> </ul> </li> </ul>          | <ul style="list-style-type: none"> <li>• Outcome: Stroke, not specified as haemorrhage or infarction (I64)</li> <li>• Measured: History of stroke</li> <li>• Epidemiological measure: Relative risk</li> <li>• Effect estimate and direction (recalculated): 1.45 (95% CI 0.42 to 4.58); No change</li> </ul>                                                                                                         |
| <b>Sparen 2004</b> <ul style="list-style-type: none"> <li>• Funding: Yes</li> <li>• Ethics: Not reported</li> </ul>         | <ul style="list-style-type: none"> <li>• Design: Cohort</li> <li>• Conflict: Siege of Leningrad (1941-1944)</li> <li>• Jurisdiction: City</li> <li>• Setting: Community</li> <li>• Exposure: Time of birth</li> </ul>              | <ul style="list-style-type: none"> <li>• Study year: 1975 to 1999</li> <li>• Sample size: 3905</li> <li>• Age: Not reported</li> <li>• % Male: 100</li> <li>• Time between exposure and outcome: 58 years</li> <li>• NOS Score: 6 <ul style="list-style-type: none"> <li>- Selection: 3</li> <li>- Comparability: 2</li> <li>- Outcome: 1</li> </ul> </li> </ul>       | <ul style="list-style-type: none"> <li>• Outcome: Stroke, not specified as haemorrhage or infarction (I64) - Mortality</li> <li>• Measured: Not reported</li> <li>• Epidemiological measure: Relative risk</li> <li>• Effect estimate and direction (as reported): 1.09 (95% CI 0.85 to 1.39); No change</li> <li>• Outcome: Intracerebral haemorrhage (I61) – Mortality</li> <li>• Measured: Not reported</li> </ul> |

| Cerebrovascular diseases (I00-I99)                                                                                           |                                                                                                                                                                                                             |                                                                                                                                                                                                                                                                                                                                                                     |                                                                                                                                                                                                                                                                                                                                                                                                                                                                                                                                                                                                                                                         |
|------------------------------------------------------------------------------------------------------------------------------|-------------------------------------------------------------------------------------------------------------------------------------------------------------------------------------------------------------|---------------------------------------------------------------------------------------------------------------------------------------------------------------------------------------------------------------------------------------------------------------------------------------------------------------------------------------------------------------------|---------------------------------------------------------------------------------------------------------------------------------------------------------------------------------------------------------------------------------------------------------------------------------------------------------------------------------------------------------------------------------------------------------------------------------------------------------------------------------------------------------------------------------------------------------------------------------------------------------------------------------------------------------|
| Author, funding, ethics                                                                                                      | Study design and setting                                                                                                                                                                                    | Study characteristics                                                                                                                                                                                                                                                                                                                                               | Outcome                                                                                                                                                                                                                                                                                                                                                                                                                                                                                                                                                                                                                                                 |
|                                                                                                                              |                                                                                                                                                                                                             |                                                                                                                                                                                                                                                                                                                                                                     | <ul style="list-style-type: none"> <li>Epidemiological measure: Relative risk</li> <li>Effect estimate and direction (as reported): 1.14 (95% CI 0.73 to 1.79);<br/>No change</li> </ul>                                                                                                                                                                                                                                                                                                                                                                                                                                                                |
| <b>Vagero 2013</b> <ul style="list-style-type: none"> <li>Funding: Yes</li> <li>Ethics: Yes</li> </ul>                       | <ul style="list-style-type: none"> <li>Design: Cohort</li> <li>Conflict: Siege of Leningrad (1941-1944)</li> <li>Jurisdiction: City</li> <li>Setting: Community</li> <li>Exposure: Time of birth</li> </ul> | <ul style="list-style-type: none"> <li>Study year: 1975-1977 (men); 1980-1982 (women)</li> <li>Sample size: 5327</li> <li>Age: Not reported</li> <li>% Male: 73</li> <li>Time between exposure and outcome: 36 years</li> <li>NOS Score: 3 <ul style="list-style-type: none"> <li>Selection: 2</li> <li>Comparability: 0</li> <li>Outcome: 1</li> </ul> </li> </ul> | <ul style="list-style-type: none"> <li>Outcome: Intracerebral haemorrhage (I61) - Mortality</li> <li>Measured: Death certificates coded by Russian physicians using ICD-8</li> <li>Epidemiological measure: Relative risk</li> <li>Effect estimate and direction (as reported): 1.17 (95% CI 1.00 to 1.36);<br/>Increase</li> <li>Outcome: Stroke, not specified as haemorrhage or infarction (I64) – Mortality</li> <li>Measured: Death certificates coded by Russian physicians using ICD-8</li> <li>Epidemiological measure: Relative risk</li> <li>Effect estimate and direction (as reported): 1.32 (95% CI 1.03 to 1.69);<br/>Increase</li> </ul> |
| <b>Vajtskjold 2016</b> <ul style="list-style-type: none"> <li>Funding: Not reported</li> <li>Ethics: Not reported</li> </ul> | <ul style="list-style-type: none"> <li>Design: Ecological</li> <li>Conflict: Israel-Gaza War (2014)</li> <li>Jurisdiction: National</li> <li>Setting: Hospital</li> <li>Exposure: Uniform</li> </ul>        | <ul style="list-style-type: none"> <li>Study year: 2013-2014</li> <li>Sample size: 1241</li> <li>Age: 52 years</li> <li>% Male: 50</li> <li>Time between exposure and outcome: 1 year4</li> <li>NOS Score: 4 <ul style="list-style-type: none"> <li>Selection: 3</li> <li>Comparability: 0</li> <li>Outcome: 1</li> </ul> </li> </ul>                               | <ul style="list-style-type: none"> <li>Outcome: Stroke, not specified as haemorrhage or infarction (I64) - Mortality</li> <li>Measured: Death notification forms</li> <li>Epidemiological measure: Relative risk</li> <li>Effect estimate and direction (recalculated): 1.01 (95% CI 0.77 to 1.31);<br/>No change</li> </ul>                                                                                                                                                                                                                                                                                                                            |



| Endocrine diseases (E00-E90)                                                                                                  |                                                                                                                                                                                                                                                      |                                                                                                                                                                                                                                                                                                                                                  |                                                                                                                                                                                                                                                                                                                                                                                                                                                                                                                                                                                                                                   |
|-------------------------------------------------------------------------------------------------------------------------------|------------------------------------------------------------------------------------------------------------------------------------------------------------------------------------------------------------------------------------------------------|--------------------------------------------------------------------------------------------------------------------------------------------------------------------------------------------------------------------------------------------------------------------------------------------------------------------------------------------------|-----------------------------------------------------------------------------------------------------------------------------------------------------------------------------------------------------------------------------------------------------------------------------------------------------------------------------------------------------------------------------------------------------------------------------------------------------------------------------------------------------------------------------------------------------------------------------------------------------------------------------------|
| Author, funding, ethics                                                                                                       | Study design and setting                                                                                                                                                                                                                             | Study characteristics                                                                                                                                                                                                                                                                                                                            | Outcome                                                                                                                                                                                                                                                                                                                                                                                                                                                                                                                                                                                                                           |
| <b>Alajbegovic 2006</b> <ul style="list-style-type: none"> <li>Funding: Not reported</li> <li>Ethics: Not reported</li> </ul> | <ul style="list-style-type: none"> <li>Design: Ecological</li> <li>Conflict: Bosnian War (1992-1995)</li> <li>Jurisdiction: City</li> <li>Setting: Hospital</li> <li>Exposure: Uniform</li> </ul>                                                    | <ul style="list-style-type: none"> <li>Study year: 1991, 1993, 1996</li> <li>Sample size: 506</li> <li>Age: 40-79 years</li> <li>% Male: 38.5</li> <li>Time between exposure and outcome: 2 years</li> <li>NOS Score: 1 <ul style="list-style-type: none"> <li>Selection: 0</li> <li>Comparability: 0</li> <li>Outcome: 1</li> </ul> </li> </ul> | <ul style="list-style-type: none"> <li>Outcome: Unspecified diabetes mellitus (E14)</li> <li>Measured: Fasting venous blood glucose of 6, 7 or more mM/L, or randomly measured glycemia of 10.0 mM/L or more at any time during the day</li> <li>Epidemiological measure: Incidence</li> <li>Effect estimate and direction (recalculated): <ul style="list-style-type: none"> <li>Pre- vs. during conflict: -160.0 (95% CI -220.2 to -99.8); Decrease</li> <li>Pre- vs. post conflict: -159.0 (95% CI -219.2 to -98.8); Decrease</li> <li>During- vs. post conflict: 1.0 (95% CI -53.8 to 55.8); No change</li> </ul> </li> </ul> |
| <b>Babic 2013</b> <ul style="list-style-type: none"> <li>Funding: Not reported</li> <li>Ethics: Not reported</li> </ul>       | <ul style="list-style-type: none"> <li>Design: Cross-sectional</li> <li>Conflict: Bosnian War (1992-1995)</li> <li>Jurisdiction: City</li> <li>Setting: Hospital</li> <li>Exposure: PTSD</li> </ul>                                                  | <ul style="list-style-type: none"> <li>Study year: Not reported</li> <li>Sample size: 120</li> <li>Age: 50-52 years</li> <li>% Male: 100</li> <li>Time between exposure and outcome: 20 years</li> <li>NOS Score: 3 <ul style="list-style-type: none"> <li>Selection: 0</li> <li>Comparability: 2</li> <li>Outcome: 1</li> </ul> </li> </ul>     | <ul style="list-style-type: none"> <li>Outcome: Other metabolic disorders (E88)</li> <li>Measured: According to criteria of the National Cholesterol Education Program - Adult Treatment Panel III</li> <li>Epidemiological measure: Relative risk</li> <li>Effect estimate and direction (recalculated): 1.93 (95% CI 1.74-2.12); Increase</li> </ul>                                                                                                                                                                                                                                                                            |
| <b>Gomez-Restrepo 2018</b> <ul style="list-style-type: none"> <li>Funding: Yes</li> <li>Ethics: Yes</li> </ul>                | <ul style="list-style-type: none"> <li>Design: Cross-sectional</li> <li>Conflict: Colombian Conflict (1975-2015)</li> <li>Jurisdiction: National</li> <li>Setting: Community</li> <li>Exposure: Exposed to specific armed conflict events</li> </ul> | <ul style="list-style-type: none"> <li>Study year: 2015</li> <li>Sample size: 10764</li> <li>Age: 18+ years</li> <li>% Male: 40</li> <li>Time between exposure and outcome: 40 years</li> <li>NOS Score: 2 <ul style="list-style-type: none"> <li>Selection: 1</li> </ul> </li> </ul>                                                            | <ul style="list-style-type: none"> <li>Outcome: Unspecified diabetes mellitus (E14)</li> <li>Measured: Self-reported</li> <li>Epidemiological measure: Relative risk</li> <li>Effect estimate and direction (recalculated): 1.34 (95% CI 1.28 to 1.40); Increase</li> </ul>                                                                                                                                                                                                                                                                                                                                                       |

| Endocrine diseases (E00-E90)                                                                                                    |                                                                                                                                                                                                                                 |                                                                                                                                                                                                                                                                                                                                                                         |                                                                                                                                                                                                                                                                                                                                   |
|---------------------------------------------------------------------------------------------------------------------------------|---------------------------------------------------------------------------------------------------------------------------------------------------------------------------------------------------------------------------------|-------------------------------------------------------------------------------------------------------------------------------------------------------------------------------------------------------------------------------------------------------------------------------------------------------------------------------------------------------------------------|-----------------------------------------------------------------------------------------------------------------------------------------------------------------------------------------------------------------------------------------------------------------------------------------------------------------------------------|
| Author, funding, ethics                                                                                                         | Study design and setting                                                                                                                                                                                                        | Study characteristics                                                                                                                                                                                                                                                                                                                                                   | Outcome                                                                                                                                                                                                                                                                                                                           |
|                                                                                                                                 |                                                                                                                                                                                                                                 | <ul style="list-style-type: none"> <li>- Comparability: 0</li> <li>- Outcome: 1</li> </ul>                                                                                                                                                                                                                                                                              |                                                                                                                                                                                                                                                                                                                                   |
| <b>Hult 2010</b> <ul style="list-style-type: none"> <li>• Funding: Yes</li> <li>• Ethics: Yes</li> </ul>                        | <ul style="list-style-type: none"> <li>• Design: Cohort</li> <li>• Conflict: Nigerian Civil War (1967-1970)</li> <li>• Jurisdiction: Subnational</li> <li>• Setting: Community</li> <li>• Exposure: Time of birth</li> </ul>    | <ul style="list-style-type: none"> <li>• Study year: 2009</li> <li>• Sample size: 1166</li> <li>• Age: 37-43 years</li> <li>• % Male: 68</li> <li>• Time between exposure and outcome: 42 years</li> <li>• NOS Score: 6               <ul style="list-style-type: none"> <li>- Selection: 2</li> <li>- Comparability: 2</li> <li>- Outcome: 2</li> </ul> </li> </ul>    | <ul style="list-style-type: none"> <li>• Outcome: Unspecified diabetes mellitus (E14)</li> <li>• Measured: Random plasma glucose <math>\geq 11.1</math> mmol/l</li> <li>• Epidemiological measure: Adjusted odds ratio</li> <li>• Effect estimate and direction (as reported): 2.16 (95% CI 1.04 to 4.49); Increase</li> </ul>    |
| <b>Kadojic 1999</b> <ul style="list-style-type: none"> <li>• Funding: Not reported</li> <li>• Ethics: Not reported</li> </ul>   | <ul style="list-style-type: none"> <li>• Design: Case-control</li> <li>• Conflict: Croatian War of Independence (1991 to 1995)</li> <li>• Jurisdiction: Camp</li> <li>• Setting: Community</li> <li>• Exposure: PTSD</li> </ul> | <ul style="list-style-type: none"> <li>• Study year: Not reported</li> <li>• Sample size: 240</li> <li>• Age: 47 years</li> <li>• % Male: 42</li> <li>• Time between exposure and outcome: 7 years</li> <li>• NOS Score: 7               <ul style="list-style-type: none"> <li>- Selection: 3</li> <li>- Comparability: 2</li> <li>- Outcome: 2</li> </ul> </li> </ul> | <ul style="list-style-type: none"> <li>• Outcome: Unspecified diabetes mellitus (E14)</li> <li>• Measured: Fasting venous sample <math>&gt;6.4</math>mmol/l</li> <li>• Epidemiological measure: Relative risk</li> <li>• Effect estimate and direction (recalculated): 1.55 (95% CI 1.32 to 1.77); Increase</li> </ul>            |
| <b>Kulenovic 1996</b> <ul style="list-style-type: none"> <li>• Funding: Not reported</li> <li>• Ethics: Not reported</li> </ul> | <ul style="list-style-type: none"> <li>• Design: Ecological</li> <li>• Conflict: Bosnian War (1992-1995)</li> <li>• Jurisdiction: City</li> <li>• Setting: Hospital</li> <li>• Exposure: Uniform</li> </ul>                     | <ul style="list-style-type: none"> <li>• Study year: 1994-1995</li> <li>• Sample size: 55</li> <li>• Age: 33-70 years</li> <li>• % Male: 53</li> <li>• Time between exposure and outcome: 5 years</li> <li>• NOS Score: 1               <ul style="list-style-type: none"> <li>- Selection: 0</li> <li>- Comparability: 0</li> <li>- Outcome: 1</li> </ul> </li> </ul>  | <ul style="list-style-type: none"> <li>• Outcome: Non-insulin dependent diabetes mellitus (E11)</li> <li>• Measured: Fasting blood glucose <math>&gt;7.8</math>mmol/l</li> <li>• Epidemiological measure: Relative risk</li> <li>• Effect estimate and direction (recalculated): 0.77 (95% CI 0.30 to 1.95); No change</li> </ul> |

| <b>Endocrine diseases (E00-E90)</b>                                                                                           |                                                                                                                                                                                                                                               |                                                                                                                                                                                                                                                                                                                                                                                             |                                                                                                                                                                                                                                                                                                                                                                                                                                                                                                                                                                                |
|-------------------------------------------------------------------------------------------------------------------------------|-----------------------------------------------------------------------------------------------------------------------------------------------------------------------------------------------------------------------------------------------|---------------------------------------------------------------------------------------------------------------------------------------------------------------------------------------------------------------------------------------------------------------------------------------------------------------------------------------------------------------------------------------------|--------------------------------------------------------------------------------------------------------------------------------------------------------------------------------------------------------------------------------------------------------------------------------------------------------------------------------------------------------------------------------------------------------------------------------------------------------------------------------------------------------------------------------------------------------------------------------|
| <b>Author, funding, ethics</b>                                                                                                | <b>Study design and setting</b>                                                                                                                                                                                                               | <b>Study characteristics</b>                                                                                                                                                                                                                                                                                                                                                                | <b>Outcome</b>                                                                                                                                                                                                                                                                                                                                                                                                                                                                                                                                                                 |
| <b>McEniry 2018</b> <ul style="list-style-type: none"> <li>• Funding: Yes</li> <li>• Ethics: Not reported</li> </ul>          | <ul style="list-style-type: none"> <li>• Design: Cross-sectional</li> <li>• Conflict: Colombian Conflict (1975-2015)</li> <li>• Jurisdiction: Subnational</li> <li>• Setting: Community</li> <li>• Exposure: Internal displacement</li> </ul> | <ul style="list-style-type: none"> <li>• Study year: 2012</li> <li>• Sample size: 1890</li> <li>• Age: 70 years</li> <li>• % Male: 44</li> <li>• Time between exposure and outcome: 37 years</li> <li>• NOS Score: 4               <ul style="list-style-type: none"> <li>- Selection: 1</li> <li>- Comparability: 2</li> <li>- Outcome: 1</li> </ul> </li> </ul>                           | <ul style="list-style-type: none"> <li>• Outcome: Unspecified diabetes mellitus (E14)</li> <li>• Measured: Self-reported</li> <li>• Epidemiological measure: Adjusted odds ratio</li> <li>• Effect estimate and direction (as reported): 1.83 (95% CI 1.10 to 3.07); Increase</li> </ul>                                                                                                                                                                                                                                                                                       |
| <b>Metelko 1992</b> <ul style="list-style-type: none"> <li>• Funding: Not reported</li> <li>• Ethics: Not reported</li> </ul> | <ul style="list-style-type: none"> <li>• Design: Ecological</li> <li>• Conflict: Croatian War of Independence (1991 to 1995)</li> <li>• Jurisdiction: City</li> <li>• Setting: Not reported</li> <li>• Exposure: Uniform</li> </ul>           | <ul style="list-style-type: none"> <li>• Study year: 1988-1991</li> <li>• Sample size: Not reported</li> <li>• Age: Not reported</li> <li>• % Male: Not reported</li> <li>• Time between exposure and outcome: 3 years</li> <li>• NOS Score: 0               <ul style="list-style-type: none"> <li>- Selection: 0</li> <li>- Comparability: 0</li> <li>- Outcome: 0</li> </ul> </li> </ul> | <ul style="list-style-type: none"> <li>• Outcome: Unspecified diabetes mellitus (E14)</li> <li>• Measured: Not reported</li> <li>• Epidemiological measure: Incidence</li> <li>• Effect estimate and direction (as reported): 1.59 vs. 1.64 (unable to test for significance) No change [Assumed]</li> <li>• Outcome: Unspecified diabetes mellitus (E14)</li> <li>• Measured: Not reported</li> <li>• Epidemiological measure: Incidence</li> <li>• Effect estimate and direction (as reported): 7.0 vs. 7.8 (unable to test for significance) No change [Assumed]</li> </ul> |
| <b>Roglic 1995</b> <ul style="list-style-type: none"> <li>• Funding: Yes</li> <li>• Ethics: Not reported</li> </ul>           | <ul style="list-style-type: none"> <li>• Design: Ecological</li> <li>• Conflict: Croatian War of Independence (1991 to 1995)</li> <li>• Jurisdiction: City</li> <li>• Setting: Hospital</li> <li>• Exposure: Uniform</li> </ul>               | <ul style="list-style-type: none"> <li>• Study year: 1988-1992</li> <li>• Sample size: 282</li> <li>• Age: 1-55+ years</li> <li>• % Male: 52</li> <li>• Time between exposure and outcome: 4 years</li> <li>• NOS Score: 0               <ul style="list-style-type: none"> <li>- Selection: 0</li> <li>- Comparability: 0</li> <li>- Outcome: 0</li> </ul> </li> </ul>                     | <ul style="list-style-type: none"> <li>• Outcome: Insulin-dependent diabetes mellitus (E10)</li> <li>• Measured: Not reported</li> <li>• Epidemiological measure: Incidence</li> <li>• Effect estimate and direction (as reported): 6.2 vs. 5.8 (unable to test for significance) No change [Assumed]</li> </ul>                                                                                                                                                                                                                                                               |

| <b>Endocrine diseases (E00-E90)</b>                                                                                       |                                                                                                                                                                                                                                           |                                                                                                                                                                                                                                                                                                                                               |                                                                                                                                                                                                                                                                                                                            |
|---------------------------------------------------------------------------------------------------------------------------|-------------------------------------------------------------------------------------------------------------------------------------------------------------------------------------------------------------------------------------------|-----------------------------------------------------------------------------------------------------------------------------------------------------------------------------------------------------------------------------------------------------------------------------------------------------------------------------------------------|----------------------------------------------------------------------------------------------------------------------------------------------------------------------------------------------------------------------------------------------------------------------------------------------------------------------------|
| <b>Author, funding, ethics</b>                                                                                            | <b>Study design and setting</b>                                                                                                                                                                                                           | <b>Study characteristics</b>                                                                                                                                                                                                                                                                                                                  | <b>Outcome</b>                                                                                                                                                                                                                                                                                                             |
| <b>Rotar 2015</b> <ul style="list-style-type: none"> <li>Funding: Yes</li> <li>Ethics: Yes</li> </ul>                     | <ul style="list-style-type: none"> <li>Design: Cohort</li> <li>Conflict: Siege of Leningrad (1941-1944)</li> <li>Jurisdiction: City</li> <li>Setting: Community</li> <li>Exposure: Time of birth</li> </ul>                               | <ul style="list-style-type: none"> <li>Study year: 2009-2011</li> <li>Sample size: 356</li> <li>Age: 65-82 years</li> <li>% Male: 27-33</li> <li>Time between exposure and outcome: 70 years</li> <li>NOS Score: 5 <ul style="list-style-type: none"> <li>Selection: 3</li> <li>Comparability: 1</li> <li>Outcome: 1</li> </ul> </li> </ul>   | <ul style="list-style-type: none"> <li>Outcome: Unspecified diabetes mellitus (E14)</li> <li>Measured: Self-reported, examination during visit and medical records</li> <li>Epidemiological measure: Relative risk</li> <li>Effect estimate and direction (recalculated): 1.08 (95% CI 0.50 to 2.34); No change</li> </ul> |
| <b>Santic 2006</b> <ul style="list-style-type: none"> <li>Funding: Not reported</li> <li>Ethics: Not reported</li> </ul>  | <ul style="list-style-type: none"> <li>Design: Cohort</li> <li>Conflict: Bosnian War (1992-1995)</li> <li>Jurisdiction: Subnational</li> <li>Setting: Community</li> <li>Exposure: Loss of family member during armed conflict</li> </ul> | <ul style="list-style-type: none"> <li>Study year: 1996 and 2003</li> <li>Sample size: 1726</li> <li>Age: 50-52 years</li> <li>% Male: 71</li> <li>Time between exposure and outcome: 11 years</li> <li>NOS Score: 2 <ul style="list-style-type: none"> <li>Selection: 1</li> <li>Comparability: 0</li> <li>Outcome: 1</li> </ul> </li> </ul> | <ul style="list-style-type: none"> <li>Outcome: Unspecified diabetes mellitus (E14)</li> <li>Measured: Self-reported and established by a trained physician</li> <li>Epidemiological measure: Relative risk</li> <li>Effect estimate and direction (recalculated): 1.63 (95% CI 1.51 to 1.74); Increase</li> </ul>         |
| <b>Stanner 2001</b> <ul style="list-style-type: none"> <li>Funding: Yes</li> <li>Ethics: Not reported</li> </ul>          | <ul style="list-style-type: none"> <li>Design: Cohort</li> <li>Conflict: Siege of Leningrad (1941-1944)</li> <li>Jurisdiction: City</li> <li>Setting: Hospital</li> <li>Exposure: Time of birth</li> </ul>                                | <ul style="list-style-type: none"> <li>Study year: Not reported</li> <li>Sample size: 549</li> <li>Age: 53 years</li> <li>% Male: 27</li> <li>Time between exposure and outcome: 59 years</li> <li>NOS Score: 4 <ul style="list-style-type: none"> <li>Selection: 3</li> <li>Comparability: 0</li> <li>Outcome: 1</li> </ul> </li> </ul>      | <ul style="list-style-type: none"> <li>Outcome: Unspecified diabetes mellitus (E14)</li> <li>Measured: WHO criteria</li> <li>Epidemiological measure: Relative risk</li> <li>Effect estimate and direction (recalculated): 0.63 (95% CI 0.37 to 0.88); Decrease</li> </ul>                                                 |
| <b>Torinek 2005</b> <ul style="list-style-type: none"> <li>Funding: Not reported</li> <li>Ethics: Not reported</li> </ul> | <ul style="list-style-type: none"> <li>Design: Cross-sectional</li> <li>Conflict: Croatian War of Independence (1991 to 1995)</li> <li>Jurisdiction: Village</li> </ul>                                                                   | <ul style="list-style-type: none"> <li>Study year: 2003</li> <li>Sample size: 497</li> <li>Age: 45+</li> <li>% Male: Not reported</li> </ul>                                                                                                                                                                                                  | <ul style="list-style-type: none"> <li>Outcome: Unspecified diabetes mellitus (E14)</li> <li>Measured: Primary care record</li> <li>Epidemiological measure: Relative risk</li> </ul>                                                                                                                                      |

| <b>Endocrine diseases (E00-E90)</b> |                                                                                                                  |                                                                                                                                                                                                                                                           |                                                                                                                                        |
|-------------------------------------|------------------------------------------------------------------------------------------------------------------|-----------------------------------------------------------------------------------------------------------------------------------------------------------------------------------------------------------------------------------------------------------|----------------------------------------------------------------------------------------------------------------------------------------|
| <b>Author, funding, ethics</b>      | <b>Study design and setting</b>                                                                                  | <b>Study characteristics</b>                                                                                                                                                                                                                              | <b>Outcome</b>                                                                                                                         |
|                                     | <ul style="list-style-type: none"> <li>• Setting: Hospital</li> <li>• Exposure: Internal displacement</li> </ul> | <ul style="list-style-type: none"> <li>• Time between exposure and outcome: 12 years</li> <li>• NOS Score: 4               <ul style="list-style-type: none"> <li>- Selection: 3</li> <li>- Comparability: 0</li> <li>- Outcome: 1</li> </ul> </li> </ul> | <ul style="list-style-type: none"> <li>• Effect estimate and direction (recalculated): 1.59 (95% CI 1.44 to 1.74); Increase</li> </ul> |

| Author, funding, ethics                                                                                         | Study design and setting                                                                                                                                                                                           | Blood pressure                                                                                                                                                                                                                                                                                                                                                     |                                                                                                                                                                                                                                                                                                                                                                                                                                                                                                                                                                                                                                                            |
|-----------------------------------------------------------------------------------------------------------------|--------------------------------------------------------------------------------------------------------------------------------------------------------------------------------------------------------------------|--------------------------------------------------------------------------------------------------------------------------------------------------------------------------------------------------------------------------------------------------------------------------------------------------------------------------------------------------------------------|------------------------------------------------------------------------------------------------------------------------------------------------------------------------------------------------------------------------------------------------------------------------------------------------------------------------------------------------------------------------------------------------------------------------------------------------------------------------------------------------------------------------------------------------------------------------------------------------------------------------------------------------------------|
|                                                                                                                 |                                                                                                                                                                                                                    | Study characteristics                                                                                                                                                                                                                                                                                                                                              | Outcome                                                                                                                                                                                                                                                                                                                                                                                                                                                                                                                                                                                                                                                    |
| <b>Hult 2010</b> <ul style="list-style-type: none"> <li>Funding: Yes</li> <li>Ethics: Yes</li> </ul>            | <ul style="list-style-type: none"> <li>Design: Cohort</li> <li>Conflict: Nigerian Civil War (1967-1970)</li> <li>Jurisdiction: Subnational</li> <li>Setting: Community</li> <li>Exposure: Time of birth</li> </ul> | <ul style="list-style-type: none"> <li>Study year: 2009</li> <li>Sample size: 1166</li> <li>Age: 37-43 years</li> <li>% Male: 68</li> <li>Time between exposure and outcome: 42 years</li> <li>NOS Score: 6 <ul style="list-style-type: none"> <li>Selection: 2</li> <li>Comparability: 2</li> <li>Outcome: 2</li> </ul> </li> </ul>                               | <ul style="list-style-type: none"> <li>Outcome: Systolic blood pressure</li> <li>Measured: Two readings three minutes apart in left arm using validated automated oscillometric device, SBP <math>\geq</math>140</li> <li>Effect estimate and direction (as reported): 2.26 (95% CI 1.68 to 3.02); Increase</li> <li>Outcome: Diastolic blood pressure</li> <li>Measured: Two readings three minutes apart in left arm using validated automated oscillometric device, DBP <math>\geq</math>90</li> <li>Epidemiological measure: Adjusted odds ratio</li> <li>Effect estimate and direction (as reported): 1.73 (95% CI 1.32 to 2.27); Increase</li> </ul> |
| <b>Koupil 2007</b> <ul style="list-style-type: none"> <li>Funding: Yes</li> <li>Ethics: Not reported</li> </ul> | <ul style="list-style-type: none"> <li>Design: Cohort</li> <li>Conflict: Siege of Leningrad (1941-1944)</li> <li>Jurisdiction: City</li> <li>Setting: Community</li> <li>Exposure: Time of birth</li> </ul>        | <ul style="list-style-type: none"> <li>Study year: 1975-1977 (men); 1980-1982 (women)</li> <li>Sample size: 5636</li> <li>Age: 42-72 years</li> <li>% Male: 70</li> <li>Time between exposure and outcome: 41 years</li> <li>NOS Score: 6 <ul style="list-style-type: none"> <li>Selection: 2</li> <li>Comparability: 2</li> <li>Outcome: 2</li> </ul> </li> </ul> | <ul style="list-style-type: none"> <li>Outcome: Systolic blood pressure</li> <li>Measured: Random zero sphygomanometer. Systolic hypertension 160+mmHg, diastolic hypertension 95+mmHg</li> <li>Epidemiological measure: Adjusted beta coefficient</li> <li>Effect estimate and direction (as reported): 1.61 (95% CI 0.28 to 2.94); Increase</li> <li>Outcome: Diastolic blood pressure</li> <li>Measured: Random zero sphygomanometer. Systolic hypertension 160+mmHg, diastolic hypertension 95+mmHg</li> <li>Epidemiological measure: Adjusted beta coefficient</li> </ul>                                                                             |

| Author, funding, ethics                                                                                                     | Study design and setting                                                                                                                                                                               | Blood pressure<br>Study characteristics                                                                                                                                                                                                                                                                                                | Outcome                                                                                                                                                                                                                                                                                                                                                                                                                                                                                                                                                                                                                          |
|-----------------------------------------------------------------------------------------------------------------------------|--------------------------------------------------------------------------------------------------------------------------------------------------------------------------------------------------------|----------------------------------------------------------------------------------------------------------------------------------------------------------------------------------------------------------------------------------------------------------------------------------------------------------------------------------------|----------------------------------------------------------------------------------------------------------------------------------------------------------------------------------------------------------------------------------------------------------------------------------------------------------------------------------------------------------------------------------------------------------------------------------------------------------------------------------------------------------------------------------------------------------------------------------------------------------------------------------|
| <b>Kulenovic 1996</b> <ul style="list-style-type: none"> <li>Funding: Not reported</li> <li>Ethics: Not reported</li> </ul> | <ul style="list-style-type: none"> <li>Design: Ecological</li> <li>Conflict: Bosnian War (1992-1995)</li> <li>Jurisdiction: City</li> <li>Setting: Hospital</li> <li>Exposure: Uniform</li> </ul>      | <ul style="list-style-type: none"> <li>Study year: 1994-1995</li> <li>Sample size: 55</li> <li>Age: 33-70 years</li> <li>% Male: 53</li> <li>Time between exposure and outcome: 5 years</li> <li>NOS Score: 1 <ul style="list-style-type: none"> <li>Selection: 0</li> <li>Comparability: 0</li> <li>Outcome: 1</li> </ul> </li> </ul> | <ul style="list-style-type: none"> <li>Effect estimate and direction (as reported): 0.56 (-0.17 to 1.28);<br/>No change</li> <li>Outcome: Systolic blood pressure</li> <li>Measured: Calibrated sphygmometer, Reister 600/306</li> <li>Epidemiological measure: Mean</li> <li>Effect estimate and direction (recalculated): -16.0 (95% CI -25.0 to -7.0);<br/>Decrease</li> <li>Outcome: Diastolic blood pressure</li> <li>Measured: Calibrated sphygmometer, Reister 600/306</li> <li>Epidemiological measure: Mean</li> <li>Effect estimate and direction (recalculated): -7.0 (95% CI -11.7 to -2.3);<br/>Decrease</li> </ul> |
| <b>Obilom 2008</b> <ul style="list-style-type: none"> <li>Funding: Not reported</li> <li>Ethics: Yes</li> </ul>             | <ul style="list-style-type: none"> <li>Design: Cross-sectional</li> <li>Conflict: Jos riots, Nigeria (2001)</li> <li>Jurisdiction: City</li> <li>Setting: Community</li> <li>Exposure: PTSD</li> </ul> | <ul style="list-style-type: none"> <li>Study year: 2002</li> <li>Sample size: 281</li> <li>Age: 10-40+ years</li> <li>% Male: 50</li> <li>Time between exposure and outcome: 1 years</li> <li>NOS Score: 4 <ul style="list-style-type: none"> <li>Selection: 3</li> <li>Comparability: 0</li> <li>Outcome: 1</li> </ul> </li> </ul>    | <ul style="list-style-type: none"> <li>Outcome: Systolic blood pressure</li> <li>Measured: <math>\geq 140</math> mmHg</li> <li>Epidemiological measure: Relative risk</li> <li>Effect estimate and direction (recalculated): 2.13 (95% CI 1.54 to 2.73);<br/>Increase</li> <li>Outcome: Diastolic blood pressure</li> <li>Measured: <math>\geq 90</math> mmHg</li> <li>Epidemiological measure: Relative risk</li> <li>Effect estimate and direction (recalculated): 0.93 (95% CI 0.52 to 1.69)<br/>No change</li> </ul>                                                                                                         |

| Author, funding, ethics                                                                                         | Study design and setting                                                                                                                                                                                    | Blood pressure                                                                                                                                                                                                                                                                                                                                 |                                                                                                                                                                                                                                                                                                                                                                                                                                                                                                                                                                                                                                                                       |
|-----------------------------------------------------------------------------------------------------------------|-------------------------------------------------------------------------------------------------------------------------------------------------------------------------------------------------------------|------------------------------------------------------------------------------------------------------------------------------------------------------------------------------------------------------------------------------------------------------------------------------------------------------------------------------------------------|-----------------------------------------------------------------------------------------------------------------------------------------------------------------------------------------------------------------------------------------------------------------------------------------------------------------------------------------------------------------------------------------------------------------------------------------------------------------------------------------------------------------------------------------------------------------------------------------------------------------------------------------------------------------------|
|                                                                                                                 |                                                                                                                                                                                                             | Study characteristics                                                                                                                                                                                                                                                                                                                          | Outcome                                                                                                                                                                                                                                                                                                                                                                                                                                                                                                                                                                                                                                                               |
| <b>Rotar 2015</b> <ul style="list-style-type: none"> <li>Funding: Yes</li> <li>Ethics: Yes</li> </ul>           | <ul style="list-style-type: none"> <li>Design: Cohort</li> <li>Conflict: Siege of Leningrad (1941-1944)</li> <li>Jurisdiction: City</li> <li>Setting: Community</li> <li>Exposure: Time of birth</li> </ul> | <ul style="list-style-type: none"> <li>Study year: 2009-2011</li> <li>Sample size: 356</li> <li>Age: 65-82 years</li> <li>% Male: 27-33</li> <li>Time between exposure and outcome: 70 years</li> <li>NOS Score: 5 <ul style="list-style-type: none"> <li>Selection: 3</li> <li>Comparability: 1</li> <li>Outcome: 1</li> </ul> </li> </ul>    | <ul style="list-style-type: none"> <li>Outcome: Systolic blood pressure</li> <li>Measured: Measured on the right arm three times after a 5 min rest in the sitting position with appropriate cuff.</li> <li>Epidemiological measure: Mean</li> <li>Effect estimate and direction (recalculated): 3.10 (95% CI -3.63 to 9.83);<br/>No change</li> <li>Outcome: Diastolic blood pressure</li> <li>Measured: Measured on the right arm three times after a 5 min rest in the sitting position with appropriate cuff.</li> <li>Epidemiological measure: Mean</li> <li>Effect estimate and direction (recalculated): 0.20 (95% CI -3.40 to 3.80);<br/>No change</li> </ul> |
| <b>Sparen 2004</b> <ul style="list-style-type: none"> <li>Funding: Yes</li> <li>Ethics: Not reported</li> </ul> | <ul style="list-style-type: none"> <li>Design: Cohort</li> <li>Conflict: Siege of Leningrad (1941-1944)</li> <li>Jurisdiction: City</li> <li>Setting: Community</li> <li>Exposure: Time of birth</li> </ul> | <ul style="list-style-type: none"> <li>Study year: 1975 to 1999</li> <li>Sample size: 3905</li> <li>Age: Not reported</li> <li>% Male: 100</li> <li>Time between exposure and outcome: 58 years</li> <li>NOS Score: 6 <ul style="list-style-type: none"> <li>Selection: 3</li> <li>Comparability: 2</li> <li>Outcome: 1</li> </ul> </li> </ul> | <ul style="list-style-type: none"> <li>Outcome: Systolic blood pressure</li> <li>Measured: Not reported</li> <li>Epidemiological measure: Adjusted beta coefficient</li> <li>Effect estimate and direction (as reported): 1.88 (95% CI 0.44 to 3.32);<br/>Increase</li> <li>Outcome: Diastolic blood pressure</li> <li>Measured: Not reported</li> <li>Epidemiological measure: Adjusted beta coefficient</li> <li>Effect estimate and direction (as reported): 0.87 (95% CI 0.07 to 1.67);<br/>Increase</li> </ul>                                                                                                                                                   |



| Author, funding, ethics                                                                                          | Study design and setting                                                                                                                                                                                    | Blood pressure                                                                                                                                                                                                                                                                                                                                                      |                                                                                                                                                                                                                                                                                                                                                                                                                                                                                                                                                                                                                                                                                                              |
|------------------------------------------------------------------------------------------------------------------|-------------------------------------------------------------------------------------------------------------------------------------------------------------------------------------------------------------|---------------------------------------------------------------------------------------------------------------------------------------------------------------------------------------------------------------------------------------------------------------------------------------------------------------------------------------------------------------------|--------------------------------------------------------------------------------------------------------------------------------------------------------------------------------------------------------------------------------------------------------------------------------------------------------------------------------------------------------------------------------------------------------------------------------------------------------------------------------------------------------------------------------------------------------------------------------------------------------------------------------------------------------------------------------------------------------------|
|                                                                                                                  |                                                                                                                                                                                                             | Study characteristics                                                                                                                                                                                                                                                                                                                                               | Outcome                                                                                                                                                                                                                                                                                                                                                                                                                                                                                                                                                                                                                                                                                                      |
| <b>Stanner 2001</b> <ul style="list-style-type: none"> <li>Funding: Yes</li> <li>Ethics: Not reported</li> </ul> | <ul style="list-style-type: none"> <li>Design: Cohort</li> <li>Conflict: Siege of Leningrad (1941-1944)</li> <li>Jurisdiction: City</li> <li>Setting: Hospital</li> <li>Exposure: Time of birth</li> </ul>  | <ul style="list-style-type: none"> <li>Study year: Not reported</li> <li>Sample size: 549</li> <li>Age: 53 years</li> <li>% Male: 27</li> <li>Time between exposure and outcome: 59 years</li> <li>NOS Score: 4 <ul style="list-style-type: none"> <li>Selection: 3</li> <li>Comparability: 0</li> <li>Outcome: 1</li> </ul> </li> </ul>                            | <ul style="list-style-type: none"> <li>Outcome: Systolic blood pressure</li> <li>Measured: Measured in triplicate with a random zero sphygmomanometer calibrated against a similar machine</li> <li>Epidemiological measure: Mean</li> <li>Effect estimate and direction (as reported): 129.8 (95% CI 127.4 to 132.2) vs. 128.5 (95% CI 125.3 to 131.7); No change</li> <li>Outcome: Diastolic blood pressure</li> <li>Measured: Measured in triplicate with a random zero sphygmomanometer calibrated against a similar machine</li> <li>Epidemiological measure: Mean</li> <li>Effect estimate and direction (as reported): 81.6 (95% CI 80.0 to 83.1) vs. 77.3 (95% CI 75.4 to 79.2); Increase</li> </ul> |
| <b>Vagero 2013</b> <ul style="list-style-type: none"> <li>Funding: Yes</li> <li>Ethics: Yes</li> </ul>           | <ul style="list-style-type: none"> <li>Design: Cohort</li> <li>Conflict: Siege of Leningrad (1941-1944)</li> <li>Jurisdiction: City</li> <li>Setting: Community</li> <li>Exposure: Time of birth</li> </ul> | <ul style="list-style-type: none"> <li>Study year: 1975-1977 (men); 1980-1982 (women)</li> <li>Sample size: 5327</li> <li>Age: Not reported</li> <li>% Male: 73</li> <li>Time between exposure and outcome: 36 years</li> <li>NOS Score: 3 <ul style="list-style-type: none"> <li>Selection: 2</li> <li>Comparability: 0</li> <li>Outcome: 1</li> </ul> </li> </ul> | <ul style="list-style-type: none"> <li>Outcome: Systolic blood pressure</li> <li>Measured: SBP&gt;160 mmHg</li> <li>Epidemiological measure: Relative risk</li> <li>Effect estimate and direction (as reported): 1.27 (95% CI 1.10 to 1.46); Increase</li> <li>Outcome: Diastolic blood pressure</li> <li>Measured: DBP&gt;95 mmHg</li> <li>Epidemiological measure: Relative risk</li> <li>Effect estimate and direction (as reported): 1.11 (95% CI 0.99 to 1.24); No change</li> </ul>                                                                                                                                                                                                                    |

| <b>Blood sugar</b>                                                                                                              |                                                                                                                                                                                                                              |                                                                                                                                                                                                                                                                                                                                                                              |                                                                                                                                                                                                                                                                                                                                                                                                                                                                                        |
|---------------------------------------------------------------------------------------------------------------------------------|------------------------------------------------------------------------------------------------------------------------------------------------------------------------------------------------------------------------------|------------------------------------------------------------------------------------------------------------------------------------------------------------------------------------------------------------------------------------------------------------------------------------------------------------------------------------------------------------------------------|----------------------------------------------------------------------------------------------------------------------------------------------------------------------------------------------------------------------------------------------------------------------------------------------------------------------------------------------------------------------------------------------------------------------------------------------------------------------------------------|
| <b>Author, funding, ethics</b>                                                                                                  | <b>Study design and setting</b>                                                                                                                                                                                              | <b>Study characteristics</b>                                                                                                                                                                                                                                                                                                                                                 | <b>Outcome</b>                                                                                                                                                                                                                                                                                                                                                                                                                                                                         |
| <b>Babic 2013</b> <ul style="list-style-type: none"> <li>• Funding: Not reported</li> <li>• Ethics: Not reported</li> </ul>     | <ul style="list-style-type: none"> <li>• Design: Cross-sectional</li> <li>• Conflict: Bosnian War (1992-1995)</li> <li>• Jurisdiction: City</li> <li>• Setting: Hospital</li> <li>• Exposure: PTSD</li> </ul>                | <ul style="list-style-type: none"> <li>• Study year: Not reported</li> <li>• Sample size: 120</li> <li>• Age: 50-52 years</li> <li>• % Male: 100</li> <li>• Time between exposure and outcome: 20 years</li> <li>• NOS Score: 2               <ul style="list-style-type: none"> <li>- Selection: 0</li> <li>- Comparability: 2</li> <li>- Outcome: 1</li> </ul> </li> </ul> | <ul style="list-style-type: none"> <li>• Outcome: Hyperglycaemia</li> <li>• Measured: Fasting blood glucose <math>\geq 6.1</math> mmol/L</li> <li>• Epidemiological measure: Relative risk</li> <li>• Effect estimate and direction (recalculated): 2.50 (95% CI 2.23-2.77); Increase</li> </ul>                                                                                                                                                                                       |
| <b>Hult 2010</b> <ul style="list-style-type: none"> <li>• Funding: Yes</li> <li>• Ethics: Yes</li> </ul>                        | <ul style="list-style-type: none"> <li>• Design: Cohort</li> <li>• Conflict: Nigerian Civil War (1967-1970)</li> <li>• Jurisdiction: Subnational</li> <li>• Setting: Community</li> <li>• Exposure: Time of birth</li> </ul> | <ul style="list-style-type: none"> <li>• Study year: 2009</li> <li>• Sample size: 1166</li> <li>• Age: 37-43 years</li> <li>• % Male: 68</li> <li>• Time between exposure and outcome: 42 years</li> <li>• NOS Score: 6               <ul style="list-style-type: none"> <li>- Selection: 2</li> <li>- Comparability: 2</li> <li>- Outcome: 2</li> </ul> </li> </ul>         | <ul style="list-style-type: none"> <li>• Outcome: Impaired glucose tolerance</li> <li>• Measured: Random plasma glucose 7.8-11.0 mmol/l</li> <li>• Epidemiological measure: Adjusted odds ratio</li> <li>• Effect estimate and direction (as reported): 1.37 (95% CI 0.97 to 1.93); No change</li> </ul>                                                                                                                                                                               |
| <b>Kulenovic 1996</b> <ul style="list-style-type: none"> <li>• Funding: Not reported</li> <li>• Ethics: Not reported</li> </ul> | <ul style="list-style-type: none"> <li>• Design: Ecological</li> <li>• Conflict: Bosnian War (1992-1995)</li> <li>• Jurisdiction: City</li> <li>• Setting: Hospital</li> <li>• Exposure: Uniform</li> </ul>                  | <ul style="list-style-type: none"> <li>• Study year: 1994-1995</li> <li>• Sample size: 55</li> <li>• Age: 33-70 years</li> <li>• % Male: 53</li> <li>• Time between exposure and outcome: 5 years</li> <li>• NOS Score: 1               <ul style="list-style-type: none"> <li>- Selection: 0</li> <li>- Comparability: 0</li> <li>- Outcome: 1</li> </ul> </li> </ul>       | <ul style="list-style-type: none"> <li>• Outcome: Fasting blood glucose</li> <li>• Measured: Fasting venous sample</li> <li>• Epidemiological measure: Mean</li> <li>• Effect estimate and direction (recalculated): -1.80 (95% CI -3.00 to -0.60); Decrease</li> <li>• Outcome: HbA1c</li> <li>• Measured: Fasting venous sample</li> <li>• Epidemiological measure: Mean</li> <li>• Effect estimate and direction (recalculated): -1.30 (95% CI -2.13 to -0.47); Decrease</li> </ul> |

| <b>Blood sugar</b>                                                                                                                      |                                                                                                                                                                                                                                                   |                                                                                                                                                                                                                                                                                                                                                                       |                                                                                                                                                                                                                                                                                                                                                                                                                                                                                                                                                                                                                                                                                                                                                                |
|-----------------------------------------------------------------------------------------------------------------------------------------|---------------------------------------------------------------------------------------------------------------------------------------------------------------------------------------------------------------------------------------------------|-----------------------------------------------------------------------------------------------------------------------------------------------------------------------------------------------------------------------------------------------------------------------------------------------------------------------------------------------------------------------|----------------------------------------------------------------------------------------------------------------------------------------------------------------------------------------------------------------------------------------------------------------------------------------------------------------------------------------------------------------------------------------------------------------------------------------------------------------------------------------------------------------------------------------------------------------------------------------------------------------------------------------------------------------------------------------------------------------------------------------------------------------|
| <b>Author, funding, ethics</b>                                                                                                          | <b>Study design and setting</b>                                                                                                                                                                                                                   | <b>Study characteristics</b>                                                                                                                                                                                                                                                                                                                                          | <b>Outcome</b>                                                                                                                                                                                                                                                                                                                                                                                                                                                                                                                                                                                                                                                                                                                                                 |
| <b>Pibernik-Okanovic 1993</b> <ul style="list-style-type: none"> <li>• Funding: Not reported</li> <li>• Ethics: Not reported</li> </ul> | <ul style="list-style-type: none"> <li>• Design: Cohort</li> <li>• Conflict: Croatian War of Independence (1991 to 1995)</li> <li>• Jurisdiction: Not reported</li> <li>• Setting: Hospital</li> <li>• Exposure: Internal displacement</li> </ul> | <ul style="list-style-type: none"> <li>• Study year: Not reported</li> <li>• Sample size: 88</li> <li>• Age: 58 years</li> <li>• % Male: 45</li> <li>• Time between exposure and outcome: 1 year</li> <li>• NOS Score: 4               <ul style="list-style-type: none"> <li>- Selection: 3</li> <li>- Comparability: 0</li> <li>- Outcome: 1</li> </ul> </li> </ul> | <ul style="list-style-type: none"> <li>• Outcome: Fasting blood glucose</li> <li>• Measured: Capillary blood</li> <li>• Epidemiological measure: Mean</li> <li>• Effect estimate and direction (recalculated): 0.60 (95% CI -0.79 to 1.99); No change</li> <li>• Outcome: Post-prandial blood glucose (mmol/l)</li> <li>• Measured: Capillary blood (90 mins after meal)</li> <li>• Epidemiological measure: Mean</li> <li>• Effect estimate and direction (recalculated): 0.10 (95% CI -1.51 to 1.71); No change</li> <li>• Outcome: HbA1c</li> <li>• Measured: Capillary blood</li> <li>• Epidemiological measure: Median</li> <li>• Effect estimate and direction (as reported): 9.8 (95% CI 8.7 to 11.5) vs. 9.1 (95% CI 8.0 to 10.7) No change</li> </ul> |
| <b>Roglic 1993</b> <ul style="list-style-type: none"> <li>• Funding: Not reported</li> <li>• Ethics: Not reported</li> </ul>            | <ul style="list-style-type: none"> <li>• Design: Cohort</li> <li>• Conflict: Croatian War of Independence (1991 to 1995)</li> <li>• Jurisdiction: City</li> <li>• Setting: Not reported</li> <li>• Exposure: Uniform</li> </ul>                   | <ul style="list-style-type: none"> <li>• Study year: 1990-1991</li> <li>• Sample size: 35</li> <li>• Age: 38-72 years</li> <li>• % Male: 40</li> <li>• Time between exposure and outcome: 1 year</li> <li>• NOS Score: 4               <ul style="list-style-type: none"> <li>- Selection: 3</li> <li>- Comparability: 0</li> <li>- Outcome: 1</li> </ul> </li> </ul> | <ul style="list-style-type: none"> <li>• Outcome: Fasting blood glucose (mM)</li> <li>• Measured: Capillary blood</li> <li>• Epidemiological measure: Mean</li> <li>• Effect estimate and direction (recalculated): 1.10 (95% CI -0.63 to 2.83); No change</li> <li>• Outcome: Post-prandial blood glucose (mM)</li> <li>• Measured: Capillary blood</li> <li>• Epidemiological measure: Mean</li> </ul>                                                                                                                                                                                                                                                                                                                                                       |

| Author, funding, ethics                                                                                          | Study design and setting                                                                                                                                                                                    | Blood sugar                                                                                                                                                                                                                                                                                                                                 |                                                                                                                                                                                                                                                                                                                                                                                                                                                                                                                                                  |
|------------------------------------------------------------------------------------------------------------------|-------------------------------------------------------------------------------------------------------------------------------------------------------------------------------------------------------------|---------------------------------------------------------------------------------------------------------------------------------------------------------------------------------------------------------------------------------------------------------------------------------------------------------------------------------------------|--------------------------------------------------------------------------------------------------------------------------------------------------------------------------------------------------------------------------------------------------------------------------------------------------------------------------------------------------------------------------------------------------------------------------------------------------------------------------------------------------------------------------------------------------|
|                                                                                                                  |                                                                                                                                                                                                             | Study characteristics                                                                                                                                                                                                                                                                                                                       | Outcome                                                                                                                                                                                                                                                                                                                                                                                                                                                                                                                                          |
|                                                                                                                  |                                                                                                                                                                                                             |                                                                                                                                                                                                                                                                                                                                             | <ul style="list-style-type: none"> <li>Effect estimate and direction (recalculated): -1.10 (95% CI -3.21 to 1.01);<br/>No change</li> <li>Outcome: HbA1c (%)</li> <li>Measured: Capillary blood</li> <li>Epidemiological measure: Mean</li> <li>Effect estimate and direction (recalculated): 0.40 (95% CI -0.71 to 1.51);<br/>No change</li> </ul>                                                                                                                                                                                              |
| <b>Rotar 2015</b> <ul style="list-style-type: none"> <li>Funding: Yes</li> <li>Ethics: Yes</li> </ul>            | <ul style="list-style-type: none"> <li>Design: Cohort</li> <li>Conflict: Siege of Leningrad (1941-1944)</li> <li>Jurisdiction: City</li> <li>Setting: Community</li> <li>Exposure: Time of birth</li> </ul> | <ul style="list-style-type: none"> <li>Study year: 2009-2011</li> <li>Sample size: 356</li> <li>Age: 65-82 years</li> <li>% Male: 27-33</li> <li>Time between exposure and outcome: 70 years</li> <li>NOS Score: 5 <ul style="list-style-type: none"> <li>Selection: 3</li> <li>Comparability: 1</li> <li>Outcome: 1</li> </ul> </li> </ul> | <ul style="list-style-type: none"> <li>Outcome: Fasting blood glucose (mmol/l)</li> <li>Measured: Blood sample after overnight fast</li> <li>Epidemiological measure: Relative risk</li> <li>Effect estimate and direction (recalculated): -0.40 (-1.00 to 0.20);<br/>No change</li> </ul>                                                                                                                                                                                                                                                       |
| <b>Stanner 2001</b> <ul style="list-style-type: none"> <li>Funding: Yes</li> <li>Ethics: Not reported</li> </ul> | <ul style="list-style-type: none"> <li>Design: Cohort</li> <li>Conflict: Siege of Leningrad (1941-1944)</li> <li>Jurisdiction: City</li> <li>Setting: Hospital</li> <li>Exposure: Time of birth</li> </ul>  | <ul style="list-style-type: none"> <li>Study year: Not reported</li> <li>Sample size: 549</li> <li>Age: 53 years</li> <li>% Male: 27</li> <li>Time between exposure and outcome: 59 years</li> <li>NOS Score: 4 <ul style="list-style-type: none"> <li>Selection: 3</li> <li>Comparability: 0</li> <li>Outcome: 1</li> </ul> </li> </ul>    | <ul style="list-style-type: none"> <li>Outcome: Impaired glucose tolerance</li> <li>Measured: WHO Criteria</li> <li>Epidemiological measure: Relative risk</li> <li>Effect estimate and direction (recalculated): 1.40 (95% CI 1.28 to 1.51);<br/>Increase</li> <li>Outcome: Fasting plasma glucose</li> <li>Measured: Venous blood sample after an overnight fast</li> <li>Epidemiological measure: Mean</li> <li>Effect estimate and direction (as reported): 5.22 (95% CI 5.13 to 5.31) vs. 5.3 (95% CI 5.1 to 5.5);<br/>No change</li> </ul> |

| Author, funding, ethics                                                                                                   | Study design and setting                                                                                                                                                                                              | Lipids                                                                                                                                                                                                                                                                                                                                       |                                                                                                                                                                                                                                                                                                                                 |
|---------------------------------------------------------------------------------------------------------------------------|-----------------------------------------------------------------------------------------------------------------------------------------------------------------------------------------------------------------------|----------------------------------------------------------------------------------------------------------------------------------------------------------------------------------------------------------------------------------------------------------------------------------------------------------------------------------------------|---------------------------------------------------------------------------------------------------------------------------------------------------------------------------------------------------------------------------------------------------------------------------------------------------------------------------------|
|                                                                                                                           |                                                                                                                                                                                                                       | Study characteristics                                                                                                                                                                                                                                                                                                                        | Outcome                                                                                                                                                                                                                                                                                                                         |
| <b>Babic 2013</b> <ul style="list-style-type: none"> <li>Funding: Not reported</li> <li>Ethics: Not reported</li> </ul>   | <ul style="list-style-type: none"> <li>Design: Cross-sectional</li> <li>Conflict: Bosnian War (1992-1995)</li> <li>Jurisdiction: City</li> <li>Setting: Hospital</li> <li>Exposure: PTSD</li> </ul>                   | <ul style="list-style-type: none"> <li>Study year: Not reported</li> <li>Sample size: 120</li> <li>Age: 50-52 years</li> <li>% Male: 100</li> <li>Time between exposure and outcome: 20 years</li> <li>NOS Score: 3 <ul style="list-style-type: none"> <li>Selection: 0</li> <li>Comparability: 2</li> <li>Outcome: 1</li> </ul> </li> </ul> | <ul style="list-style-type: none"> <li>Outcome: Hypertriglyceridemia</li> <li>Measured: Fasting blood triglycerides <math>\geq 1.7</math> mmol/L</li> <li>Epidemiological measure: Relative risk</li> <li>Effect estimate and direction (recalculated): 1.41 (95% CI 1.22-1.60); Increase</li> </ul>                            |
| <b>Babic 2013</b> <ul style="list-style-type: none"> <li>Funding: Not reported</li> <li>Ethics: Not reported</li> </ul>   | <ul style="list-style-type: none"> <li>Design: Cross-sectional</li> <li>Conflict: Bosnian War (1992-1995)</li> <li>Jurisdiction: City</li> <li>Setting: Hospital</li> <li>Exposure: PTSD</li> </ul>                   | <ul style="list-style-type: none"> <li>Study year: Not reported</li> <li>Sample size: 120</li> <li>Age: 50-52 years</li> <li>% Male: 100</li> <li>Time between exposure and outcome: 20 years</li> <li>NOS Score: 2 <ul style="list-style-type: none"> <li>Selection: 0</li> <li>Comparability: 2</li> <li>Outcome: 0</li> </ul> </li> </ul> | <ul style="list-style-type: none"> <li>Outcome: Low HDL-cholesterol</li> <li>Measured: Not reported</li> <li>Epidemiological measure: Relative risk</li> <li>Effect estimate and direction (recalculated): 1.19 (95% CI 0.54-2.62); No change</li> </ul>                                                                        |
| <b>Kadojic 1999</b> <ul style="list-style-type: none"> <li>Funding: Not reported</li> <li>Ethics: Not reported</li> </ul> | <ul style="list-style-type: none"> <li>Design: Case-control</li> <li>Conflict: Croatian War of Independence (1991 to 1995)</li> <li>Jurisdiction: Camp</li> <li>Setting: Community</li> <li>Exposure: PTSD</li> </ul> | <ul style="list-style-type: none"> <li>Study year: Not reported</li> <li>Sample size: 240</li> <li>Age: 47 years</li> <li>% Male: 42</li> <li>Time between exposure and outcome: 7 years</li> <li>NOS Score: 7 <ul style="list-style-type: none"> <li>Selection: 3</li> <li>Comparability: 2</li> <li>Outcome: 2</li> </ul> </li> </ul>      | <ul style="list-style-type: none"> <li>Outcome: Hyperlipidaemia</li> <li>Measured: Either cholesterol <math>&gt;6</math>mmol/l or triglycerides <math>&gt;3</math>mmol/l</li> <li>Epidemiological measure: Relative risk</li> <li>Effect estimate and direction (recalculated): 1.85 (95% CI 1.72 to 1.98); Increase</li> </ul> |

| <b>Lipids</b>                                                                                                                       |                                                                                                                                                                                                             |                                                                                                                                                                                                                                                                                                                                                                    |                                                                                                                                                                                                                                                                                                                                                                                                                                                                                                                         |
|-------------------------------------------------------------------------------------------------------------------------------------|-------------------------------------------------------------------------------------------------------------------------------------------------------------------------------------------------------------|--------------------------------------------------------------------------------------------------------------------------------------------------------------------------------------------------------------------------------------------------------------------------------------------------------------------------------------------------------------------|-------------------------------------------------------------------------------------------------------------------------------------------------------------------------------------------------------------------------------------------------------------------------------------------------------------------------------------------------------------------------------------------------------------------------------------------------------------------------------------------------------------------------|
| <b>Author, funding, ethics</b>                                                                                                      | <b>Study design and setting</b>                                                                                                                                                                             | <b>Study characteristics</b>                                                                                                                                                                                                                                                                                                                                       | <b>Outcome</b>                                                                                                                                                                                                                                                                                                                                                                                                                                                                                                          |
| <b>Koupil 2007</b> <ul style="list-style-type: none"> <li>Funding: Yes</li> <li>Ethics: Not reported</li> </ul>                     | <ul style="list-style-type: none"> <li>Design: Cohort</li> <li>Conflict: Siege of Leningrad (1941-1944)</li> <li>Jurisdiction: City</li> <li>Setting: Community</li> <li>Exposure: Time of birth</li> </ul> | <ul style="list-style-type: none"> <li>Study year: 1975-1977 (men); 1980-1982 (women)</li> <li>Sample size: 5636</li> <li>Age: 42-72 years</li> <li>% Male: 70</li> <li>Time between exposure and outcome: 41 years</li> <li>NOS Score: 6 <ul style="list-style-type: none"> <li>Selection: 2</li> <li>Comparability: 2</li> <li>Outcome: 2</li> </ul> </li> </ul> | <ul style="list-style-type: none"> <li>Outcome: Total cholesterol</li> <li>Measured: Not reported</li> <li>Epidemiological measure: Adjusted beta coefficient</li> <li>Effect estimate and direction (as reported): 0.05 (00.01 to 0.11); No change</li> <li>Outcome: Triglycerides</li> <li>Measured: Not reported</li> <li>Epidemiological measure: Adjusted beta coefficient</li> <li>Effect estimate and direction (as reported): 0.05 (95% CI 0.001 to 0.09); Increase</li> </ul>                                  |
| <b>Kulenovic 1996</b> <ul style="list-style-type: none"> <li>Funding: Not reported</li> <li>Ethics: Not reported</li> </ul>         | <ul style="list-style-type: none"> <li>Design: Ecological</li> <li>Conflict: Bosnian War (1992-1995)</li> <li>Jurisdiction: City</li> <li>Setting: Hospital</li> <li>Exposure: Uniform</li> </ul>           | <ul style="list-style-type: none"> <li>Study year: 1994-1995</li> <li>Sample size: 55</li> <li>Age: 33-70 years</li> <li>% Male: 53</li> <li>Time between exposure and outcome: 5 years</li> <li>NOS Score: 1 <ul style="list-style-type: none"> <li>Selection: 0</li> <li>Comparability: 0</li> <li>Outcome: 1</li> </ul> </li> </ul>                             | <ul style="list-style-type: none"> <li>Outcome: Total cholesterol</li> <li>Measured: BIORAD Micro Column Test</li> <li>Epidemiological measure: Mean</li> <li>Effect estimate and direction (recalculated): 0.00 (95% CI -0.64 to 0.64); No change</li> <li>Outcome: Triglycerides</li> <li>Measured: Automated Abbot-Spectrum using Trace Cholesterol commercial kits</li> <li>Epidemiological measure: Mean</li> <li>Effect estimate and direction (recalculated): -0.50 (95% CI -1.27 to 0.27); No change</li> </ul> |
| <b>Pibernik-Okanovic 1993</b> <ul style="list-style-type: none"> <li>Funding: Not reported</li> <li>Ethics: Not reported</li> </ul> | <ul style="list-style-type: none"> <li>Design: Cohort</li> <li>Conflict: Croatian War of Independence (1991 to 1995)</li> </ul>                                                                             | <ul style="list-style-type: none"> <li>Study year: Not reported</li> <li>Sample size: 88</li> <li>Age: 58 years</li> <li>% Male: 45</li> </ul>                                                                                                                                                                                                                     | <ul style="list-style-type: none"> <li>Outcome: Serum cholesterol</li> <li>Measured: Fasting venous samples</li> <li>Epidemiological measure: Median</li> </ul>                                                                                                                                                                                                                                                                                                                                                         |

| Author, funding, ethics                                                                                                      | Lipids                                                                                                                                                                                                                          |                                                                                                                                                                                                                                                                                                                                                         |                                                                                                                                                                                                                                                                                                                                                                                                                                                                                                                                                                                                          |
|------------------------------------------------------------------------------------------------------------------------------|---------------------------------------------------------------------------------------------------------------------------------------------------------------------------------------------------------------------------------|---------------------------------------------------------------------------------------------------------------------------------------------------------------------------------------------------------------------------------------------------------------------------------------------------------------------------------------------------------|----------------------------------------------------------------------------------------------------------------------------------------------------------------------------------------------------------------------------------------------------------------------------------------------------------------------------------------------------------------------------------------------------------------------------------------------------------------------------------------------------------------------------------------------------------------------------------------------------------|
|                                                                                                                              | Study design and setting                                                                                                                                                                                                        | Study characteristics                                                                                                                                                                                                                                                                                                                                   | Outcome                                                                                                                                                                                                                                                                                                                                                                                                                                                                                                                                                                                                  |
|                                                                                                                              | <ul style="list-style-type: none"> <li>• Jurisdiction: Not reported</li> <li>• Setting: Hospital</li> <li>• Exposure: Internal displacement</li> </ul>                                                                          | <ul style="list-style-type: none"> <li>• Time between exposure and outcome: 1 year</li> <li>• NOS Score: 4 <ul style="list-style-type: none"> <li>- Selection: 3</li> <li>- Comparability: 0</li> <li>- Outcome: 1</li> </ul> </li> </ul>                                                                                                               | <ul style="list-style-type: none"> <li>• Effect estimate and direction (as reported): 6.05 (95% CI 5.03 to 7.25) vs. 5.86 (95% CI 5.42 to 6.83);<br/>No change</li> <li>• Outcome: Serum triglycerides</li> <li>• Measured: Fasting venous samples</li> <li>• Epidemiological measure: Median</li> <li>• Effect estimate and direction (as reported): 1.60 (95% CI 1.21 2.25) vs. 1.40 (95% CI 1.07 to 1.73);<br/>No change</li> </ul>                                                                                                                                                                   |
| <b>Roglic 1993</b> <ul style="list-style-type: none"> <li>• Funding: Not reported</li> <li>• Ethics: Not reported</li> </ul> | <ul style="list-style-type: none"> <li>• Design: Cohort</li> <li>• Conflict: Croatian War of Independence (1991 to 1995)</li> <li>• Jurisdiction: City</li> <li>• Setting: Not reported</li> <li>• Exposure: Uniform</li> </ul> | <ul style="list-style-type: none"> <li>• Study year: 1990-1991</li> <li>• Sample size: 35</li> <li>• Age: 38-72 years</li> <li>• % Male: 40</li> <li>• Time between exposure and outcome: 1 year</li> <li>• NOS Score: 4 <ul style="list-style-type: none"> <li>- Selection: 3</li> <li>- Comparability: 0</li> <li>- Outcome: 1</li> </ul> </li> </ul> | <ul style="list-style-type: none"> <li>• Outcome: Triglycerides (mM)</li> <li>• Measured: Venous blood sample after a 12 hour fast</li> <li>• Epidemiological measure: Mean</li> <li>• Effect estimate and direction (as reported): 2.46 (95% CI 0.90 to 9.37) vs. 1.84 (95% CI 0.51 to 4.77);<br/>Decrease</li> <li>• Outcome: Total cholesterol (mM)</li> <li>• Measured: Venous blood sample after a 12 hour fast</li> <li>• Epidemiological measure: Mean</li> <li>• Effect estimate and direction (as reported): 6.67 (95% CI 4.47 to 9.89) vs. 5.93 (95% CI 3.47 to 9.18);<br/>Decrease</li> </ul> |
| <b>Rotar 2015</b> <ul style="list-style-type: none"> <li>• Funding: Yes</li> <li>• Ethics: Yes</li> </ul>                    | <ul style="list-style-type: none"> <li>• Design: Cohort</li> <li>• Conflict: Siege of Leningrad (1941-1944)</li> <li>• Jurisdiction: City</li> <li>• Setting: Community</li> <li>• Exposure: Time of birth</li> </ul>           | <ul style="list-style-type: none"> <li>• Study year: 2009-2011</li> <li>• Sample size: 356</li> <li>• Age: 65-82 years</li> <li>• % Male: 27-33</li> <li>• Time between exposure and outcome: 70 years</li> </ul>                                                                                                                                       | <ul style="list-style-type: none"> <li>• Outcome: Total cholesterol (mmol/l)</li> <li>• Measured: Blood sample after overnight fast</li> <li>• Epidemiological measure: Mean</li> <li>• Effect estimate and direction (recalculated): 0.20 (95% CI -0.26 to 0.66);<br/>No change</li> </ul>                                                                                                                                                                                                                                                                                                              |

| Author, funding, ethics                                                                                                  | Study design and setting                                                                                                                                                                                                                  | Lipids                                                                                                                                                                                                                                                                                                                                                      |                                                                                                                                                                                                                                                                                                                                                                                                                                                                                                                                 |
|--------------------------------------------------------------------------------------------------------------------------|-------------------------------------------------------------------------------------------------------------------------------------------------------------------------------------------------------------------------------------------|-------------------------------------------------------------------------------------------------------------------------------------------------------------------------------------------------------------------------------------------------------------------------------------------------------------------------------------------------------------|---------------------------------------------------------------------------------------------------------------------------------------------------------------------------------------------------------------------------------------------------------------------------------------------------------------------------------------------------------------------------------------------------------------------------------------------------------------------------------------------------------------------------------|
|                                                                                                                          |                                                                                                                                                                                                                                           | Study characteristics                                                                                                                                                                                                                                                                                                                                       | Outcome                                                                                                                                                                                                                                                                                                                                                                                                                                                                                                                         |
|                                                                                                                          |                                                                                                                                                                                                                                           | <ul style="list-style-type: none"> <li>NOS Score: 5               <ul style="list-style-type: none"> <li>Selection: 3</li> <li>Comparability: 1</li> <li>Outcome: 1</li> </ul> </li> </ul>                                                                                                                                                                  | <ul style="list-style-type: none"> <li>Outcome: HDL (mmol/l)</li> <li>Measured: Blood sample after overnight fast</li> <li>Epidemiological measure: Mean</li> <li>Effect estimate and direction (recalculated): 0.15 (95% CI 0.07 to 0.23); Increase</li> <li>Outcome: Triglycerides (mmol/l)</li> <li>Measured: Blood sample after overnight fast</li> <li>Epidemiological measure: Mean</li> <li>Effect estimate and direction (recalculated): -0.16 (95% CI -0.41 to 0.09); No change</li> </ul>                             |
| <b>Santic 2006</b> <ul style="list-style-type: none"> <li>Funding: Not reported</li> <li>Ethics: Not reported</li> </ul> | <ul style="list-style-type: none"> <li>Design: Cohort</li> <li>Conflict: Bosnian War (1992-1995)</li> <li>Jurisdiction: Subnational</li> <li>Setting: Community</li> <li>Exposure: Loss of family member during armed conflict</li> </ul> | <ul style="list-style-type: none"> <li>Study year: 1996 and 2003</li> <li>Sample size: 1726</li> <li>Age: 50-52 years</li> <li>% Male: 71</li> <li>Time between exposure and outcome: 11 years</li> <li>NOS Score: 2               <ul style="list-style-type: none"> <li>Selection: 1</li> <li>Comparability: 0</li> <li>Outcome: 1</li> </ul> </li> </ul> | <ul style="list-style-type: none"> <li>Outcome: Increased cholesterol</li> <li>Measured: &gt;5.5 mmol/L</li> <li>Epidemiological measure: Relative risk</li> <li>Effect estimate and direction (recalculated): 1.03 (95% CI 0.78 to 1.36); No change</li> <li>Outcome: Increased triglycerides</li> <li>Measured: &gt;1.90 mmol/L for men and &gt;1.60 mmol/L for women</li> <li>Epidemiological measure: Relative risk</li> <li>Effect estimate and direction (recalculated): 0.95 (95% CI 0.60 to 1.50); No change</li> </ul> |
| <b>Stanner 2001</b> <ul style="list-style-type: none"> <li>Funding: Yes</li> <li>Ethics: Not reported</li> </ul>         | <ul style="list-style-type: none"> <li>Design: Cohort</li> <li>Conflict: Siege of Leningrad (1941-1944)</li> <li>Jurisdiction: City</li> <li>Setting: Hospital</li> <li>Exposure: Time of birth</li> </ul>                                | <ul style="list-style-type: none"> <li>Study year: Not reported</li> <li>Sample size: 549</li> <li>Age: 53 years</li> <li>% Male: 27</li> <li>Time between exposure and outcome: 59 years</li> <li>NOS Score: 4</li> </ul>                                                                                                                                  | <ul style="list-style-type: none"> <li>Outcome: Total cholesterol (mmol/l)</li> <li>Measured: Venous blood sample after an overnight fast</li> <li>Epidemiological measure: Mean</li> <li>Effect estimate and direction (as reported): 5.5 (95% CI 5.4 to 5.6) vs. 5.5 (95% CI 5.4</li> </ul>                                                                                                                                                                                                                                   |



| Author, funding, ethics | Study design and setting | Lipids<br>Study characteristics                                                                                    | Outcome                                                                                                                                                                                                                                                                                                                                                                                                                                                                                                                                                                                                                                                                                                                                                                                                                                                                                                                                    |
|-------------------------|--------------------------|--------------------------------------------------------------------------------------------------------------------|--------------------------------------------------------------------------------------------------------------------------------------------------------------------------------------------------------------------------------------------------------------------------------------------------------------------------------------------------------------------------------------------------------------------------------------------------------------------------------------------------------------------------------------------------------------------------------------------------------------------------------------------------------------------------------------------------------------------------------------------------------------------------------------------------------------------------------------------------------------------------------------------------------------------------------------------|
|                         |                          | <ul style="list-style-type: none"> <li>- Selection: 3</li> <li>- Comparability: 0</li> <li>- Outcome: 1</li> </ul> | <p>to 5.6);<br/>No change</p> <ul style="list-style-type: none"> <li>• Outcome: Triglyceride (mmol/l)</li> <li>• Measured: Venous blood sample after an overnight fast</li> <li>• Epidemiological measure: Mean</li> <li>• Effect estimate and direction (as reported): 1.1 (95% CI 0.5 to 1.7) vs. 1.0 (95% CI 0.5 to 2.0);<br/>No change</li> <li>• Outcome: High density lipoprotein (mmol/l)</li> <li>• Measured: Venous blood sample after an overnight fast</li> <li>• Epidemiological measure: Mean</li> <li>• Effect estimate and direction (as reported): 1.4 (95% CI 1.2 to 1.4) vs. 1.4 (95% CI 1.3 to 1.5);<br/>No change</li> <li>• Outcome: Low density lipoprotein (mmol/l)</li> <li>• Measured: Venous blood sample after an overnight fast</li> <li>• Epidemiological measure: Mean</li> <li>• Effect estimate and direction (as reported): 3.5 (95% CI 3.3 to 3.7) vs. 3.6 (95% CI 3.5 to 3.7);<br/>No change</li> </ul> |

| Alcohol                                                                                                                           |                                                                                                                                                                                                                                                          |                                                                                                                                                                                                                                                                                                                                               |                                                                                                                                                                                                                                                                                                          |
|-----------------------------------------------------------------------------------------------------------------------------------|----------------------------------------------------------------------------------------------------------------------------------------------------------------------------------------------------------------------------------------------------------|-----------------------------------------------------------------------------------------------------------------------------------------------------------------------------------------------------------------------------------------------------------------------------------------------------------------------------------------------|----------------------------------------------------------------------------------------------------------------------------------------------------------------------------------------------------------------------------------------------------------------------------------------------------------|
| Author, funding, ethics                                                                                                           | Study design and setting                                                                                                                                                                                                                                 | Study characteristics                                                                                                                                                                                                                                                                                                                         | Outcome                                                                                                                                                                                                                                                                                                  |
| <b>Babic 2013</b> <ul style="list-style-type: none"> <li>Funding: Not reported</li> <li>Ethics: Not reported</li> </ul>           | <ul style="list-style-type: none"> <li>Design: Cross-sectional</li> <li>Conflict: Bosnian War (1992-1995)</li> <li>Jurisdiction: City</li> <li>Setting: Hospital</li> <li>Exposure: PTSD</li> </ul>                                                      | <ul style="list-style-type: none"> <li>Study year: Not reported</li> <li>Sample size: 120</li> <li>Age: 50-52 years</li> <li>% Male: 100</li> <li>Time between exposure and outcome: 20 years</li> <li>NOS Score: 2 <ul style="list-style-type: none"> <li>Selection: 0</li> <li>Comparability: 2</li> <li>Outcome: 0</li> </ul> </li> </ul>  | <ul style="list-style-type: none"> <li>Outcome: Often use</li> <li>Measured: Self-reported</li> <li>Epidemiological measure: Relative risk</li> <li>Effect estimate and direction (recalculated): 5.00 (95% CI 1.36-18.34); Increase</li> </ul>                                                          |
| <b>de la Espriella Guerrero 2016</b> <ul style="list-style-type: none"> <li>Funding: Yes</li> <li>Ethics: Not reported</li> </ul> | <ul style="list-style-type: none"> <li>Design: Cross-sectional</li> <li>Conflict: Colombian Conflict (1975-2015)</li> <li>Jurisdiction: National</li> <li>Setting: Community</li> <li>Exposure: Exposed to specific armed conflict events</li> </ul>     | <ul style="list-style-type: none"> <li>Study year: 2015</li> <li>Sample size: 15351</li> <li>Age: 12+ years</li> <li>% Male: Not reported</li> <li>Time between exposure and outcome: 40 years</li> <li>NOS Score: 2 <ul style="list-style-type: none"> <li>Selection: 2</li> <li>Comparability: 0</li> <li>Outcome: 0</li> </ul> </li> </ul> | <ul style="list-style-type: none"> <li>Outcome: Increase use</li> <li>Measured: AUDIT-C <math>\geq 4</math></li> <li>Epidemiological measure: Relative risk</li> <li>Effect estimate and direction (as reported): Exposed: 7.8 (95% CI 6.2 to 9.8) Unexposed: 6.5 (95% CI 5.8-7.3); No change</li> </ul> |
| <b>Ertl 2016</b> <ul style="list-style-type: none"> <li>Funding: Yes</li> <li>Ethics: Yes</li> </ul>                              | <ul style="list-style-type: none"> <li>Design: Cross-sectional</li> <li>Conflict: Unspecified conflicts in Uganda</li> <li>Jurisdiction: Subnational</li> <li>Setting: Community</li> <li>Exposure: Exposed to specific armed conflict events</li> </ul> | <ul style="list-style-type: none"> <li>Study year: 2010</li> <li>Sample size: 304</li> <li>Age: 41 years</li> <li>% Male: 100</li> <li>Time between exposure and outcome: N/A</li> <li>NOS Score: 5 <ul style="list-style-type: none"> <li>Selection: 2</li> <li>Comparability: 2</li> <li>Outcome: 1</li> </ul> </li> </ul>                  | <ul style="list-style-type: none"> <li>Outcome: Increase use</li> <li>Measured: AUDIT</li> <li>Epidemiological measure: Adjusted beta coefficient</li> <li>Effect estimate and direction (as reported): 0.18 (p&lt;0.05); Increase</li> </ul>                                                            |
| <b>Farhood 2010</b> <ul style="list-style-type: none"> <li>Funding: Not reported</li> <li>Ethics: Yes</li> </ul>                  | <ul style="list-style-type: none"> <li>Design: Cross-sectional</li> <li>Conflict: Lebanese Civil War (1975-1991)</li> <li>Jurisdiction: Subnational</li> <li>Setting: Community</li> </ul>                                                               | <ul style="list-style-type: none"> <li>Study year: 2002</li> <li>Sample size: 208</li> <li>Age: 31-33 years</li> <li>% Male: 91</li> </ul>                                                                                                                                                                                                    | <ul style="list-style-type: none"> <li>Outcome: Hazardous drinking</li> <li>Measured: AUDIT <math>\geq 8</math></li> <li>Epidemiological measure: Adjusted odds ratio</li> </ul>                                                                                                                         |

| Author, funding, ethics                                                                                                 | Study design and setting                                                                                                                                                                                                                                 | Alcohol                                                                                                                                                                                                                                                                                                                                              |                                                                                                                                                                                                                                                       |
|-------------------------------------------------------------------------------------------------------------------------|----------------------------------------------------------------------------------------------------------------------------------------------------------------------------------------------------------------------------------------------------------|------------------------------------------------------------------------------------------------------------------------------------------------------------------------------------------------------------------------------------------------------------------------------------------------------------------------------------------------------|-------------------------------------------------------------------------------------------------------------------------------------------------------------------------------------------------------------------------------------------------------|
|                                                                                                                         |                                                                                                                                                                                                                                                          | Study characteristics                                                                                                                                                                                                                                                                                                                                | Outcome                                                                                                                                                                                                                                               |
|                                                                                                                         | <ul style="list-style-type: none"> <li>Exposure: Hostage of war</li> </ul>                                                                                                                                                                               | <ul style="list-style-type: none"> <li>Time between exposure and outcome: 27</li> <li>NOS Score: 5 <ul style="list-style-type: none"> <li>Selection: 2</li> <li>Comparability: 2</li> <li>Outcome: 1</li> </ul> </li> </ul>                                                                                                                          | <ul style="list-style-type: none"> <li>Effect estimate and direction (recalculated): 8.39 (95% CI 1.06 to 66.25); Increase</li> </ul>                                                                                                                 |
| <b>Gilic 2005</b> <ul style="list-style-type: none"> <li>Funding: Not reported</li> <li>Ethics: Not reported</li> </ul> | <ul style="list-style-type: none"> <li>Design: Ecological</li> <li>Conflict: Croatian War of Independence (1991 to 1995)</li> <li>Jurisdiction: City</li> <li>Setting: Hospital</li> <li>Exposure: Uniform</li> </ul>                                    | <ul style="list-style-type: none"> <li>Study year: 1986-1995</li> <li>Sample size: 1374</li> <li>Age: Not reported</li> <li>% Male: Not reported</li> <li>Time between exposure and outcome: 9 years</li> <li>NOS Score: 0 <ul style="list-style-type: none"> <li>Selection: 0</li> <li>Comparability: 0</li> <li>Outcome: 0</li> </ul> </li> </ul>  | <ul style="list-style-type: none"> <li>Outcome: Alcohol disease</li> <li>Measured: Not reported</li> <li>Epidemiological measure: Incidence</li> <li>Effect estimate and direction (recalculated): -53.2 (95% CI -85.7 to -20.7); Decrease</li> </ul> |
| <b>Gomez-Restrepo 2016</b> <ul style="list-style-type: none"> <li>Funding: Yes</li> <li>Ethics: Yes</li> </ul>          | <ul style="list-style-type: none"> <li>Design: Cross-sectional</li> <li>Conflict: Colombian Conflict (1975-2015)</li> <li>Jurisdiction: National</li> <li>Setting: Community</li> <li>Exposure: Exposed to specific armed conflict events</li> </ul>     | <ul style="list-style-type: none"> <li>Study year: 1986-1995</li> <li>Sample size: 1374</li> <li>Age: Not reported</li> <li>% Male: Not reported</li> <li>Time between exposure and outcome: 40 years</li> <li>NOS Score: 3 <ul style="list-style-type: none"> <li>Selection: 1</li> <li>Comparability: 0</li> <li>Outcome: 2</li> </ul> </li> </ul> | <ul style="list-style-type: none"> <li>Outcome: Excessive use</li> <li>Measured: AUDIT-C</li> <li>Epidemiological measure: Relative risk</li> <li>Effect estimate and direction (recalculated): 0.75 (95% CI 0.72 to 0.78); Decrease</li> </ul>       |
| <b>Jewkes 2017</b> <ul style="list-style-type: none"> <li>Funding: Yes</li> <li>Ethics: Yes</li> </ul>                  | <ul style="list-style-type: none"> <li>Design: Cross-sectional</li> <li>Conflict: Bougainville Civil War (1988-1998)</li> <li>Jurisdiction: National</li> <li>Setting: Community</li> <li>Exposure: Exposed to specific armed conflict events</li> </ul> | <ul style="list-style-type: none"> <li>Study year: 2012</li> <li>Sample size: 1743</li> <li>Age: 18-49 years</li> <li>% Male: 50</li> <li>Time between exposure and outcome: 24 years</li> <li>NOS Score: 6 <ul style="list-style-type: none"> <li>Selection: 3</li> <li>Comparability: 2</li> </ul> </li> </ul>                                     | <ul style="list-style-type: none"> <li>Outcome: Alcohol abuse</li> <li>Measured: AUDIT</li> <li>Epidemiological measure: Adjusted odds ratio</li> <li>Effect estimate and direction (as reported): 1.48 (95% CI 1.02 to 2.16); Increase</li> </ul>    |

| Author, funding, ethics                                                                                                   | Study design and setting                                                                                                                                                                                                                                      | Alcohol                                                                                                                                                                                                                                                                                                                                     |                                                                                                                                                                                                                                                                                                                                    |
|---------------------------------------------------------------------------------------------------------------------------|---------------------------------------------------------------------------------------------------------------------------------------------------------------------------------------------------------------------------------------------------------------|---------------------------------------------------------------------------------------------------------------------------------------------------------------------------------------------------------------------------------------------------------------------------------------------------------------------------------------------|------------------------------------------------------------------------------------------------------------------------------------------------------------------------------------------------------------------------------------------------------------------------------------------------------------------------------------|
|                                                                                                                           |                                                                                                                                                                                                                                                               | Study characteristics                                                                                                                                                                                                                                                                                                                       | Outcome                                                                                                                                                                                                                                                                                                                            |
|                                                                                                                           |                                                                                                                                                                                                                                                               | -                                                                                                                                                                                                                                                                                                                                           | Outcome: 1                                                                                                                                                                                                                                                                                                                         |
| <b>Kadojic 1999</b> <ul style="list-style-type: none"> <li>Funding: Not reported</li> <li>Ethics: Not reported</li> </ul> | <ul style="list-style-type: none"> <li>Design: Case-control</li> <li>Conflict: Croatian War of Independence (1991 to 1995)</li> <li>Jurisdiction: Camp</li> <li>Setting: Community</li> <li>Exposure: PTSD</li> </ul>                                         | <ul style="list-style-type: none"> <li>Study year: Not reported</li> <li>Sample size: 240</li> <li>Age: 47 years</li> <li>% Male: 42</li> <li>Time between exposure and outcome: 7 years</li> <li>NOS Score: 7 <ul style="list-style-type: none"> <li>Selection: 3</li> <li>Comparability: 2</li> <li>Outcome: 2</li> </ul> </li> </ul>     | <ul style="list-style-type: none"> <li>Outcome: Alcoholism</li> <li>Measured: Diagnosed by psychiatrist using ICD-10 code F10.2, or daily consumption &gt;50ml</li> <li>Epidemiological measure: Relative risk</li> <li>Effect estimate and direction (recalculated): 0.33 (95% CI 0.13 to 0.87); Decrease</li> </ul>              |
| <b>Kozaric-Kovacic 1993</b> <ul style="list-style-type: none"> <li>Funding: Yes</li> <li>Ethics: Not reported</li> </ul>  | <ul style="list-style-type: none"> <li>Design: Cross-sectional</li> <li>Conflict: Croatian War of Independence (1991 to 1995)</li> <li>Jurisdiction: Camp</li> <li>Setting: Community</li> <li>Exposure: Exposed to specific armed conflict events</li> </ul> | <ul style="list-style-type: none"> <li>Study year: Not reported</li> <li>Sample size: 368</li> <li>Age: Not reported</li> <li>% Male: 43</li> <li>Time between exposure and outcome: 8 years</li> <li>NOS Score: 1 <ul style="list-style-type: none"> <li>Selection: 1</li> <li>Comparability: 0</li> <li>Outcome: 0</li> </ul> </li> </ul> | <ul style="list-style-type: none"> <li>Outcome: Alcohol dependence</li> <li>Measured: Indicative result on CAGE questionnaire and symptoms of alcohol dependence</li> <li>Epidemiological measure: Mean</li> <li>Effect estimate and direction (as reported): 2.1 vs. 2.0 (no other data reported); No change [assumed]</li> </ul> |
| <b>Lien 2016</b> <ul style="list-style-type: none"> <li>Funding: Yes</li> <li>Ethics: Yes</li> </ul>                      | <ul style="list-style-type: none"> <li>Design: Cross-sectional</li> <li>Conflict: Sudan Civil War (1983-2015)</li> <li>Jurisdiction: Subnational</li> <li>Setting: Community</li> <li>Exposure: Exposed to specific armed conflict events</li> </ul>          | <ul style="list-style-type: none"> <li>Study year: 2012</li> <li>Sample size: 465</li> <li>Age: Not reported</li> <li>% Male: 47</li> <li>Time between exposure and outcome: 29 years</li> <li>NOS Score: 4 <ul style="list-style-type: none"> <li>Selection: 1</li> <li>Comparability: 2</li> <li>Outcome: 1</li> </ul> </li> </ul>        | <ul style="list-style-type: none"> <li>Outcome: Harmful/hazardous drinking</li> <li>Measured: AUDIT<math>\geq</math>8</li> <li>Epidemiological measure: Adjusted odds ratio</li> <li>Effect estimate and direction (as reported): 1.18 (95% CI 0.95 to 1.48); No change</li> </ul>                                                 |

| <b>Alcohol</b>                                                                                                            |                                                                                                                                                                                                                                                        |                                                                                                                                                                                                                                                                                                                                      |                                                                                                                                                                                                                                                                                                                     |
|---------------------------------------------------------------------------------------------------------------------------|--------------------------------------------------------------------------------------------------------------------------------------------------------------------------------------------------------------------------------------------------------|--------------------------------------------------------------------------------------------------------------------------------------------------------------------------------------------------------------------------------------------------------------------------------------------------------------------------------------|---------------------------------------------------------------------------------------------------------------------------------------------------------------------------------------------------------------------------------------------------------------------------------------------------------------------|
| <b>Author, funding, ethics</b>                                                                                            | <b>Study design and setting</b>                                                                                                                                                                                                                        | <b>Study characteristics</b>                                                                                                                                                                                                                                                                                                         | <b>Outcome</b>                                                                                                                                                                                                                                                                                                      |
| <b>Londono 2012</b> <ul style="list-style-type: none"> <li>Funding: Not reported</li> <li>Ethics: Yes</li> </ul>          | <ul style="list-style-type: none"> <li>Design: Cross-sectional</li> <li>Conflict: Colombian Conflict (1975-2015)</li> <li>Jurisdiction: Village</li> <li>Setting: Community</li> <li>Exposure: Uniform</li> </ul>                                      | <ul style="list-style-type: none"> <li>Study year: 2011</li> <li>Sample size: 84</li> <li>Age: 24 years</li> <li>% Male: 25-27</li> <li>Time between exposure and outcome: 36 years</li> <li>NOS Score: 2 <ul style="list-style-type: none"> <li>Selection: 2</li> <li>Comparability: 0</li> <li>Outcome: 0</li> </ul> </li> </ul>   | <ul style="list-style-type: none"> <li>Outcome: Alcohol abuse</li> <li>Measured: PHQ Scale - any affirmative answer in the alcohol abuse section</li> <li>Epidemiological measure: Relative risk</li> <li>Effect estimate and direction (recalculated): 1.60 (95% CI 1.31 to 1.89); Increase</li> </ul>             |
| <b>Puac Polanco 2015</b> <ul style="list-style-type: none"> <li>Funding: Yes</li> <li>Ethics: Not reported</li> </ul>     | <ul style="list-style-type: none"> <li>Design: Cross-sectional</li> <li>Conflict: Guatemalan Civil War (1960-1996)</li> <li>Jurisdiction: National</li> <li>Setting: Community</li> <li>Exposure: Exposed to specific armed conflict events</li> </ul> | <ul style="list-style-type: none"> <li>Study year: 2009</li> <li>Sample size: 1452</li> <li>Age: 18-65 years</li> <li>% Male: 37</li> <li>Time between exposure and outcome: 49 years</li> <li>NOS Score: 4 <ul style="list-style-type: none"> <li>Selection: 1</li> <li>Comparability: 2</li> <li>Outcome: 1</li> </ul> </li> </ul> | <ul style="list-style-type: none"> <li>Outcome: Alcohol-related disorders (Alcohol abuse and alcohol dependence)</li> <li>Measured: Self-reported, DSM-IV</li> <li>Epidemiological measure: Adjusted odds ratio</li> <li>Effect estimate and direction (as reported): 4.3 (95% CI 1.0 to 19.0); Increase</li> </ul> |
| <b>Puertas 2006</b> <ul style="list-style-type: none"> <li>Funding: Not reported</li> <li>Ethics: Not reported</li> </ul> | <ul style="list-style-type: none"> <li>Design: Cross-sectional</li> <li>Conflict: Colombian Conflict (1975-2015)</li> <li>Jurisdiction: City</li> <li>Setting: Community</li> <li>Exposure: Internal displacement</li> </ul>                           | <ul style="list-style-type: none"> <li>Survey year: 2004</li> <li>Sample size: 878</li> <li>Age: 18+ years</li> <li>% Male: 32</li> <li>Time between exposure and outcome: 29 years</li> <li>NOS Score: 5 <ul style="list-style-type: none"> <li>Selection: 2</li> <li>Comparability: 2</li> <li>Outcome: 1</li> </ul> </li> </ul>   | <ul style="list-style-type: none"> <li>Outcome: Alcohol problem in the last 30 days</li> <li>Measured: Self-reported</li> <li>Epidemiological measure: Adjusted odds ratio</li> <li>Effect estimate and direction (as reported): 0.60 (95% CI 0.34 to 1.08); No change</li> </ul>                                   |
| <b>Roberts 2011</b> <ul style="list-style-type: none"> <li>Funding: Yes</li> <li>Ethics: Yes</li> </ul>                   | <ul style="list-style-type: none"> <li>Design: Cross-sectional</li> <li>Unspecified conflicts in Uganda</li> <li>Jurisdiction: Camp</li> <li>Setting: Community</li> </ul>                                                                             | <ul style="list-style-type: none"> <li>Study year: 2006</li> <li>Sample size: 1206</li> <li>Age: 35 years</li> <li>% Male: 40</li> </ul>                                                                                                                                                                                             | <ul style="list-style-type: none"> <li>Outcome: Alcohol disorder</li> <li>Measured: AUDIT</li> <li>Epidemiological measure: Adjusted odds ratio</li> </ul>                                                                                                                                                          |

| <b>Alcohol</b>                                                                                                           |                                                                                                                                                                                                                                                                 |                                                                                                                                                                                                                                                                                                                                                                   |                                                                                                                                                                                                                                                                                    |
|--------------------------------------------------------------------------------------------------------------------------|-----------------------------------------------------------------------------------------------------------------------------------------------------------------------------------------------------------------------------------------------------------------|-------------------------------------------------------------------------------------------------------------------------------------------------------------------------------------------------------------------------------------------------------------------------------------------------------------------------------------------------------------------|------------------------------------------------------------------------------------------------------------------------------------------------------------------------------------------------------------------------------------------------------------------------------------|
| <b>Author, funding, ethics</b>                                                                                           | <b>Study design and setting</b>                                                                                                                                                                                                                                 | <b>Study characteristics</b>                                                                                                                                                                                                                                                                                                                                      | <b>Outcome</b>                                                                                                                                                                                                                                                                     |
|                                                                                                                          | <ul style="list-style-type: none"> <li>Exposure: Exposed to specific armed conflict events</li> </ul>                                                                                                                                                           | <ul style="list-style-type: none"> <li>Time between exposure and outcome: N/A</li> <li>NOS Score: 5               <ul style="list-style-type: none"> <li>- Selection: 2</li> <li>- Comparability: 2</li> <li>- Outcome: 1</li> </ul> </li> </ul>                                                                                                                  | <ul style="list-style-type: none"> <li>Effect estimate and direction (as reported): 1.09 (95% CI 0.92 to 1.30);<br/>No change</li> </ul>                                                                                                                                           |
| <b>Roberts 2014</b> <ul style="list-style-type: none"> <li>Funding: Yes</li> <li>Ethics: Yes</li> </ul>                  | <ul style="list-style-type: none"> <li>Design: Cross-sectional</li> <li>Conflict: Georgian-Ossetian Conflict (1989-present)</li> <li>Jurisdiction: National</li> <li>Setting: Community</li> <li>Exposure: Exposed to specific armed conflict events</li> </ul> | <ul style="list-style-type: none"> <li>Study year: 2011</li> <li>Sample size: 3600</li> <li>Age: 47 years</li> <li>% Male: 35</li> <li>Time between exposure and outcome: 22 years</li> <li>NOS Score: 6               <ul style="list-style-type: none"> <li>- Selection: 3</li> <li>- Comparability: 2</li> <li>- Outcome: 1</li> </ul> </li> </ul>             | <ul style="list-style-type: none"> <li>Outcome: Hazardous drinking</li> <li>Measured: AUDIT<math>\geq</math>8</li> <li>Epidemiological measure: Adjusted odds ratio</li> <li>Effect estimate and direction (as reported): 2.27 (95% CI 1.50 to 3.45);<br/>Increase</li> </ul>      |
| <b>Santic 2006</b> <ul style="list-style-type: none"> <li>Funding: Not reported</li> <li>Ethics: Not reported</li> </ul> | <ul style="list-style-type: none"> <li>Design: Cohort</li> <li>Conflict: Bosnian War (1992-1995)</li> <li>Jurisdiction: Subnational</li> <li>Setting: Community</li> <li>Exposure: Loss of family member during armed conflict</li> </ul>                       | <ul style="list-style-type: none"> <li>Study year: 1996 and 2003</li> <li>Sample size: 1726</li> <li>Age: 50-52 years</li> <li>% Male: 71</li> <li>Time between exposure and outcome: 11 years</li> <li>NOS Score: 2               <ul style="list-style-type: none"> <li>- Selection: 1</li> <li>- Comparability: 0</li> <li>- Outcome: 1</li> </ul> </li> </ul> | <ul style="list-style-type: none"> <li>Outcome: Alcohol use</li> <li>Measured: Self-reported, irrespective of intensity</li> <li>Epidemiological measure: Relative risk</li> <li>Effect estimate and direction (recalculated): 1.36 (95% CI 1.11 to 1.66);<br/>Increase</li> </ul> |

| Author, funding, ethics                                                                                                      | Study design and setting                                                                                                                                                                                                           | Body mass index                                                                                                                                                                                                                                                                                                                              |                                                                                                                                                                                                                                                                                                                                                                                                                                                                                                                         |
|------------------------------------------------------------------------------------------------------------------------------|------------------------------------------------------------------------------------------------------------------------------------------------------------------------------------------------------------------------------------|----------------------------------------------------------------------------------------------------------------------------------------------------------------------------------------------------------------------------------------------------------------------------------------------------------------------------------------------|-------------------------------------------------------------------------------------------------------------------------------------------------------------------------------------------------------------------------------------------------------------------------------------------------------------------------------------------------------------------------------------------------------------------------------------------------------------------------------------------------------------------------|
|                                                                                                                              |                                                                                                                                                                                                                                    | Study characteristics                                                                                                                                                                                                                                                                                                                        | Outcome                                                                                                                                                                                                                                                                                                                                                                                                                                                                                                                 |
| <b>Babic 2013</b> <ul style="list-style-type: none"> <li>Funding: Not reported</li> <li>Ethics: Not reported</li> </ul>      | <ul style="list-style-type: none"> <li>Design: Cross-sectional</li> <li>Conflict: Bosnian War (1992-1995)</li> <li>Jurisdiction: City</li> <li>Setting: Hospital</li> <li>Exposure: PTSD</li> </ul>                                | <ul style="list-style-type: none"> <li>Study year: Not reported</li> <li>Sample size: 120</li> <li>Age: 50-52 years</li> <li>% Male: 100</li> <li>Time between exposure and outcome: 20 years</li> <li>NOS Score: 3 <ul style="list-style-type: none"> <li>Selection: 0</li> <li>Comparability: 2</li> <li>Outcome: 1</li> </ul> </li> </ul> | <ul style="list-style-type: none"> <li>Outcome: Obesity</li> <li>Measured: Measured in centimeters with participants standing at a point yielding the smallest circumference between the lower rib margins and the iliac crest. Cut off not stated</li> <li>Epidemiological measure: Relative risk</li> <li>Effect estimate and direction (recalculated): 1.52 (95% CI 1.36 to 1.69); Increase</li> </ul>                                                                                                               |
| <b>Delbiso 2016</b> <ul style="list-style-type: none"> <li>Funding: Yes</li> <li>Ethics: Yes</li> </ul>                      | <ul style="list-style-type: none"> <li>Design: Cross-sectional</li> <li>Conflict: Unspecified conflicts at the Ethiopian borders</li> <li>Jurisdiction: National</li> <li>Setting: Community</li> <li>Exposure: Uniform</li> </ul> | <ul style="list-style-type: none"> <li>Study year: 2011</li> <li>Sample size: 6334</li> <li>Age: 20-49 years</li> <li>% Male: 0</li> <li>Time between exposure and outcome: N/A</li> <li>NOS Score: 5 <ul style="list-style-type: none"> <li>Selection: 2</li> <li>Comparability: 2</li> <li>Outcome: 1</li> </ul> </li> </ul>               | <ul style="list-style-type: none"> <li>Outcome: Overweight</li> <li>Measured: Body mass index <math>\geq 25</math></li> <li>Epidemiological measure: Adjusted odds ratio</li> <li>Effect estimate and direction (as reported): 0.73 (95% CI 0.54 to 0.95); Decrease</li> <li>Outcome: Underweight</li> <li>Measured: Body mass index <math>&lt; 18.5</math></li> <li>Epidemiological measure: Adjusted odds ratio</li> <li>Effect estimate and direction (as reported): 1.59 (95% CI 1.32 to 1.90); Increase</li> </ul> |
| <b>Ghazanfari 2009</b> <ul style="list-style-type: none"> <li>Funding: Not reported</li> <li>Ethics: Not reported</li> </ul> | <ul style="list-style-type: none"> <li>Design: Cohort</li> <li>Conflict: Iran-Iraq War (1980-1988)</li> <li>Jurisdiction: Subnational</li> <li>Setting: Community</li> <li>Exposure: Chemical warfare exposure</li> </ul>          | <ul style="list-style-type: none"> <li>Study year: 2006</li> <li>Sample size: 482</li> <li>Age: 20-60 years</li> <li>% Male: 100</li> <li>Time between exposure and outcome: 20 years</li> <li>NOS Score: 4 <ul style="list-style-type: none"> <li>Selection: 4</li> <li>Comparability: 0</li> <li>Outcome: 0</li> </ul> </li> </ul>         | <ul style="list-style-type: none"> <li>Outcome: Body mass index</li> <li>Measured: Trained research personnel measured height and weight by a Seca 220 (made by Germany).</li> <li>Epidemiological measure: Mean</li> <li>Effect estimate and direction (recalculated): 0.50 (95% CI -0.31 to 1.31); No change</li> <li>Outcome: Overweight</li> </ul>                                                                                                                                                                  |

| Author, funding, ethics                                                                                                       | Study design and setting                                                                                                                                                                                                                    | Body mass index<br>Study characteristics                                                                                                                                                                                                                                                                                                                   | Outcome                                                                                                                                                                                                                                                                                                                               |
|-------------------------------------------------------------------------------------------------------------------------------|---------------------------------------------------------------------------------------------------------------------------------------------------------------------------------------------------------------------------------------------|------------------------------------------------------------------------------------------------------------------------------------------------------------------------------------------------------------------------------------------------------------------------------------------------------------------------------------------------------------|---------------------------------------------------------------------------------------------------------------------------------------------------------------------------------------------------------------------------------------------------------------------------------------------------------------------------------------|
|                                                                                                                               |                                                                                                                                                                                                                                             |                                                                                                                                                                                                                                                                                                                                                            | <ul style="list-style-type: none"> <li>• Measured: Body mass index</li> <li>• Epidemiological measure: Relative risk</li> <li>• Effect estimate and direction (recalculated): 1.09 (95% CI 1.04 to 1.14); Increase</li> </ul>                                                                                                         |
|                                                                                                                               |                                                                                                                                                                                                                                             |                                                                                                                                                                                                                                                                                                                                                            | <ul style="list-style-type: none"> <li>• Outcome: Obesity</li> <li>• Measured: Body mass index</li> <li>• Epidemiological measure: Relative risk</li> <li>• Effect estimate and direction (recalculated): 0.87 (95% CI 0.51 to 1.48); No change</li> </ul>                                                                            |
| <b>Grimard 2014</b> <ul style="list-style-type: none"> <li>• Funding: Not reported</li> <li>• Ethics: Not reported</li> </ul> | <ul style="list-style-type: none"> <li>• Design: Cross-sectional</li> <li>• Conflict: Peru's internal conflict (1980-present)</li> <li>• Jurisdiction: National</li> <li>• Setting: Community</li> <li>• Exposure: Time of birth</li> </ul> | <ul style="list-style-type: none"> <li>• Study year: 2004-2008</li> <li>• Sample size: 9592</li> <li>• Age: 15-49 years</li> <li>• % Male: 0</li> <li>• Time between exposure and outcome: 28 years</li> <li>• NOS Score: 5 <ul style="list-style-type: none"> <li>- Selection: 2</li> <li>- Comparability: 2</li> <li>- Outcome: 1</li> </ul> </li> </ul> | <ul style="list-style-type: none"> <li>• Outcome: Body mass index</li> <li>• Measured: Not reported</li> <li>• Epidemiological measure: Adjusted beta coefficient</li> <li>• Effect estimate and direction (as reported): 0.004 (p&gt;0.05); No change</li> </ul>                                                                     |
| <b>Hult 2010</b> <ul style="list-style-type: none"> <li>• Funding: Yes</li> <li>• Ethics: Yes</li> </ul>                      | <ul style="list-style-type: none"> <li>• Design: Cohort</li> <li>• Conflict: Nigerian Civil War (1967-1970)</li> <li>• Jurisdiction: Subnational</li> <li>• Setting: Community</li> <li>• Exposure: Time of birth</li> </ul>                | <ul style="list-style-type: none"> <li>• Study year: 2009</li> <li>• Sample size: 1166</li> <li>• Age: 37-43 years</li> <li>• % Male: 68</li> <li>• Time between exposure and outcome: 42 years</li> <li>• NOS Score: 6 <ul style="list-style-type: none"> <li>- Selection: 2</li> <li>- Comparability: 2</li> <li>- Outcome: 2</li> </ul> </li> </ul>     | <ul style="list-style-type: none"> <li>• Outcome: Overweight</li> <li>• Measured: BMI &gt;25 mg/m2</li> <li>• Epidemiological measure: Adjusted odds ratio</li> <li>• Effect estimate and direction (as reported): 1.18 (95% CI 0.96 to 3.29); No change</li> <li>• Outcome: Obesity</li> <li>• Measured: BMI &gt;30 mg/m2</li> </ul> |



| Author, funding, ethics                                                                                                     | Study design and setting                                                                                                                                                                                              | Body mass index                                                                                                                                                                                                                                                                                                                                                    |                                                                                                                                                                                                                                                                           |
|-----------------------------------------------------------------------------------------------------------------------------|-----------------------------------------------------------------------------------------------------------------------------------------------------------------------------------------------------------------------|--------------------------------------------------------------------------------------------------------------------------------------------------------------------------------------------------------------------------------------------------------------------------------------------------------------------------------------------------------------------|---------------------------------------------------------------------------------------------------------------------------------------------------------------------------------------------------------------------------------------------------------------------------|
|                                                                                                                             |                                                                                                                                                                                                                       | Study characteristics                                                                                                                                                                                                                                                                                                                                              | Outcome                                                                                                                                                                                                                                                                   |
|                                                                                                                             |                                                                                                                                                                                                                       |                                                                                                                                                                                                                                                                                                                                                                    | <ul style="list-style-type: none"> <li>Epidemiological measure: Adjusted odds ratio</li> <li>Effect estimate and direction (as reported): 1.25 (95% CI 0.98 to 1.58); No change</li> </ul>                                                                                |
| <b>Kadojic 1999</b> <ul style="list-style-type: none"> <li>Funding: Not reported</li> <li>Ethics: Not reported</li> </ul>   | <ul style="list-style-type: none"> <li>Design: Case-control</li> <li>Conflict: Croatian War of Independence (1991 to 1995)</li> <li>Jurisdiction: Camp</li> <li>Setting: Community</li> <li>Exposure: PTSD</li> </ul> | <ul style="list-style-type: none"> <li>Study year: Not reported</li> <li>Sample size: 240</li> <li>Age: 47 years</li> <li>% Male: 42</li> <li>Time between exposure and outcome: 7 years</li> <li>NOS Score: 7 <ul style="list-style-type: none"> <li>Selection: 3</li> <li>Comparability: 2</li> <li>Outcome: 2</li> </ul> </li> </ul>                            | <ul style="list-style-type: none"> <li>Outcome: Obesity</li> <li>Measured: Quetelet's index &gt;2.5</li> <li>Epidemiological measure: Relative risk</li> <li>Effect estimate and direction (recalculated): 1.68 (95% CI 0.56 to 1.80); Increase</li> </ul>                |
| <b>Koupil 2007</b> <ul style="list-style-type: none"> <li>Funding: Yes</li> <li>Ethics: Not reported</li> </ul>             | <ul style="list-style-type: none"> <li>Design: Cohort</li> <li>Conflict: Siege of Leningrad (1941-1944)</li> <li>Jurisdiction: City</li> <li>Setting: Community</li> <li>Exposure: Time of birth</li> </ul>           | <ul style="list-style-type: none"> <li>Study year: 1975-1977 (men); 1980-1982 (women)</li> <li>Sample size: 5636</li> <li>Age: 42-72 years</li> <li>% Male: 70</li> <li>Time between exposure and outcome: 41 years</li> <li>NOS Score: 6 <ul style="list-style-type: none"> <li>Selection: 2</li> <li>Comparability: 2</li> <li>Outcome: 2</li> </ul> </li> </ul> | <ul style="list-style-type: none"> <li>Outcome: Body mass index</li> <li>Measured: Not reported</li> <li>Epidemiological measure: Adjusted beta coefficient</li> <li>Effect estimate and direction (as reported): -0.09 (95% CI -0.28 to 0.10); No change</li> </ul>      |
| <b>Kulenovic 1996</b> <ul style="list-style-type: none"> <li>Funding: Not reported</li> <li>Ethics: Not reported</li> </ul> | <ul style="list-style-type: none"> <li>Design: Ecological</li> <li>Conflict: Bosnian War (1992-1995)</li> <li>Jurisdiction: City</li> <li>Setting: Hospital</li> <li>Exposure: Uniform</li> </ul>                     | <ul style="list-style-type: none"> <li>Study year: 1994-1995</li> <li>Sample size: 55</li> <li>Age: 33-70 years</li> <li>% Male: 53</li> <li>Time between exposure and outcome: 5 years</li> <li>NOS Score: 0</li> </ul>                                                                                                                                           | <ul style="list-style-type: none"> <li>Outcome: Obesity</li> <li>Measured: Body mass index &gt;30 kg/m<sup>2</sup></li> <li>Epidemiological measure: Relative risk</li> <li>Effect estimate and direction (recalculated): 0.30 (95% CI 0.13 to 0.72); Decrease</li> </ul> |

| Author, funding, ethics                                                                                                                 | Study design and setting                                                                                                                                                                                                           | Body mass index                                                                                                                                                                                                                                                                                                                                   |                                                                                                                                                                                                                                                                                                                                                                                                                                                                                                                                                                                                                                                                                                               |
|-----------------------------------------------------------------------------------------------------------------------------------------|------------------------------------------------------------------------------------------------------------------------------------------------------------------------------------------------------------------------------------|---------------------------------------------------------------------------------------------------------------------------------------------------------------------------------------------------------------------------------------------------------------------------------------------------------------------------------------------------|---------------------------------------------------------------------------------------------------------------------------------------------------------------------------------------------------------------------------------------------------------------------------------------------------------------------------------------------------------------------------------------------------------------------------------------------------------------------------------------------------------------------------------------------------------------------------------------------------------------------------------------------------------------------------------------------------------------|
|                                                                                                                                         |                                                                                                                                                                                                                                    | Study characteristics                                                                                                                                                                                                                                                                                                                             | Outcome                                                                                                                                                                                                                                                                                                                                                                                                                                                                                                                                                                                                                                                                                                       |
|                                                                                                                                         |                                                                                                                                                                                                                                    | <ul style="list-style-type: none"> <li>- Selection: 0</li> <li>- Comparability: 0</li> <li>- Outcome: 0</li> </ul>                                                                                                                                                                                                                                | <ul style="list-style-type: none"> <li>• Outcome: Overweight</li> <li>• Measured: Body mass index &gt;25 kg/m<sup>2</sup> in females, &gt;27 kg/m<sup>2</sup> in males</li> <li>• Epidemiological measure: Relative risk</li> <li>• Effect estimate and direction (recalculated): 0.65 (95% CI 0.25 to 1.68);<br/>No change</li> <li>• Outcome: Body mass index</li> <li>• Measured: Pre-conflict: Recall of lowest weight during the conflict. During conflict: Weighed and measured using a Secca 770 digital scale and a Secca 225 height stameter.</li> <li>• Epidemiological measure: Mean</li> <li>• Effect estimate and direction (recalculated): -4.10 (95% CI -5.67 to -2.3)<br/>Decrease</li> </ul> |
| <b>McNabb 1994</b> <ul style="list-style-type: none"> <li>• Funding: Not reported</li> <li>• Ethics: Not reported</li> </ul>            | <ul style="list-style-type: none"> <li>• Design: Cross-sectional</li> <li>• Conflict: Nagorno-Karabakh conflict (1988-present)</li> <li>• Jurisdiction: City</li> <li>• Setting: Community</li> <li>• Exposure: Uniform</li> </ul> | <ul style="list-style-type: none"> <li>• Study year: 1992</li> <li>• Sample size: 381</li> <li>• Age: 60+ years</li> <li>• % Male: 37</li> <li>• Time between exposure and outcome: 1 year</li> <li>• NOS Score: 4 <ul style="list-style-type: none"> <li>- Selection: 3</li> <li>- Comparability: 1</li> <li>- Outcome: 0</li> </ul> </li> </ul> | <ul style="list-style-type: none"> <li>• Outcome: Body mass index</li> <li>• Measured: Self-reported</li> <li>• Epidemiological measure: Mean</li> <li>• Effect estimate and direction (as reported):<br/>Male: 27.4 vs. 26.2<br/>Female: 28.5 vs. 26.8<br/>Decrease [Assumed]</li> </ul>                                                                                                                                                                                                                                                                                                                                                                                                                     |
| <b>Pibernik-Okanovic 1993</b> <ul style="list-style-type: none"> <li>• Funding: Not reported</li> <li>• Ethics: Not reported</li> </ul> | <ul style="list-style-type: none"> <li>• Design: Cohort</li> <li>• Conflict: Croatian War of Independence (1991 to 1995)</li> <li>• Jurisdiction: Not reported</li> <li>• Setting: Hospital</li> </ul>                             | <ul style="list-style-type: none"> <li>• Study year: Not reported</li> <li>• Sample size: 88</li> <li>• Age: 58 years</li> <li>• % Male: 45</li> <li>• Time between exposure and outcome: 1 year</li> <li>• NOS Score: 4</li> </ul>                                                                                                               | <ul style="list-style-type: none"> <li>• Outcome: Body mass index</li> <li>• Measured: Not reported</li> <li>• Epidemiological measure: Mean</li> <li>• Effect estimate and direction (recalculated): 0.30 (95% CI -1.20 to 1.80);<br/>No change</li> </ul>                                                                                                                                                                                                                                                                                                                                                                                                                                                   |

| Author, funding, ethics                                                                                            | Study design and setting                                                                                                                                                                                                                      | Body mass index                                                                                                                                                                                                                                                                                                                             |                                                                                                                                                                                                                                                                                                                                                                                                                                                                                                                                                                                     |
|--------------------------------------------------------------------------------------------------------------------|-----------------------------------------------------------------------------------------------------------------------------------------------------------------------------------------------------------------------------------------------|---------------------------------------------------------------------------------------------------------------------------------------------------------------------------------------------------------------------------------------------------------------------------------------------------------------------------------------------|-------------------------------------------------------------------------------------------------------------------------------------------------------------------------------------------------------------------------------------------------------------------------------------------------------------------------------------------------------------------------------------------------------------------------------------------------------------------------------------------------------------------------------------------------------------------------------------|
|                                                                                                                    |                                                                                                                                                                                                                                               | Study characteristics                                                                                                                                                                                                                                                                                                                       | Outcome                                                                                                                                                                                                                                                                                                                                                                                                                                                                                                                                                                             |
|                                                                                                                    | <ul style="list-style-type: none"> <li>Exposure: Internal displacement</li> </ul>                                                                                                                                                             | <ul style="list-style-type: none"> <li>Selection: 3</li> <li>Comparability: 0</li> <li>Outcome: 1</li> </ul>                                                                                                                                                                                                                                |                                                                                                                                                                                                                                                                                                                                                                                                                                                                                                                                                                                     |
| <b>Robertson 1995</b> <ul style="list-style-type: none"> <li>Funding: Yes</li> <li>Ethics: Not reported</li> </ul> | <ul style="list-style-type: none"> <li>Design: Cross-sectional</li> <li>Conflict: Croatian War of Independence (1991 to 1995)</li> <li>Jurisdiction: National</li> <li>Setting: Community</li> <li>Exposure: Internal displacement</li> </ul> | <ul style="list-style-type: none"> <li>Study year: 1993</li> <li>Sample size: 2181</li> <li>Age: 18-40 years</li> <li>% Male: 0</li> <li>Time between exposure and outcome: 2 years</li> <li>NOS Score: 4 <ul style="list-style-type: none"> <li>Selection: 3</li> <li>Comparability: 0</li> <li>Outcome: 1</li> </ul> </li> </ul>          | <ul style="list-style-type: none"> <li>Outcome: Body mass index</li> <li>Measured: Weight and stature were measured using Seca 770 digital scale and Seca height statometers.</li> <li>Epidemiological measure: Mean</li> <li>Effect estimate and direction (as reported): 23.0 (95% CI 22.8 to 23.2) vs. 22.3 (95% CI 22.2 to 22.5); Increase</li> </ul>                                                                                                                                                                                                                           |
| <b>Rotar 2015</b> <ul style="list-style-type: none"> <li>Funding: Yes</li> <li>Ethics: Yes</li> </ul>              | <ul style="list-style-type: none"> <li>Design: Cohort</li> <li>Conflict: Siege of Leningrad (1941-1944)</li> <li>Jurisdiction: City</li> <li>Setting: Community</li> <li>Exposure: Time of birth</li> </ul>                                   | <ul style="list-style-type: none"> <li>Study year: 2009-2011</li> <li>Sample size: 356</li> <li>Age: 65-82 years</li> <li>% Male: 27-33</li> <li>Time between exposure and outcome: 70 years</li> <li>NOS Score: 5 <ul style="list-style-type: none"> <li>Selection: 3</li> <li>Comparability: 1</li> </ul> </li> <li>Outcome: 1</li> </ul> | <ul style="list-style-type: none"> <li>Outcome: Obesity</li> <li>Measured: Body mass index &gt;30 kg/m<sup>2</sup></li> <li>Epidemiological measure: Relative risk</li> <li>Effect estimate and direction (recalculated): 0.78 (95% CI 0.67 to 0.89); Decrease</li> <li>Outcome: Body mass index</li> <li>Measured: Weight measured by a medical scale known as the VEM-150 - 'Massa-K', height assessed by a stadiometer (Russia)</li> <li>Epidemiological measure: Mean</li> <li>Effect estimate and direction (recalculated): -1.10 (95% CI -2.52 to 0.32); No change</li> </ul> |
| <b>Sparen 2004</b> <ul style="list-style-type: none"> <li>Funding: Yes</li> <li>Ethics: Not reported</li> </ul>    | <ul style="list-style-type: none"> <li>Design: Cohort</li> <li>Conflict: Siege of Leningrad (1941-1944)</li> <li>Jurisdiction: City</li> <li>Setting: Community</li> </ul>                                                                    | <ul style="list-style-type: none"> <li>Study year: 1975 to 1999</li> <li>Sample size: 3905</li> <li>Age: Not reported</li> <li>% Male: 100</li> </ul>                                                                                                                                                                                       | <ul style="list-style-type: none"> <li>Outcome: Overweight</li> <li>Measured: Body mass index &gt;25 kg/m<sup>2</sup></li> <li>Epidemiological measure: Relative risk</li> <li>Effect estimate and direction (as reported): 0.89 (95% CI 0.78 to 1.02); No change</li> </ul>                                                                                                                                                                                                                                                                                                        |

| Author, funding, ethics                                                                                          | Study design and setting                                                                                                                                                                                            | Body mass index                                                                                                                                                                                                                                                                                                                            |                                                                                                                                                                                                                                                                                                                                                                                                                                                                                                       |
|------------------------------------------------------------------------------------------------------------------|---------------------------------------------------------------------------------------------------------------------------------------------------------------------------------------------------------------------|--------------------------------------------------------------------------------------------------------------------------------------------------------------------------------------------------------------------------------------------------------------------------------------------------------------------------------------------|-------------------------------------------------------------------------------------------------------------------------------------------------------------------------------------------------------------------------------------------------------------------------------------------------------------------------------------------------------------------------------------------------------------------------------------------------------------------------------------------------------|
|                                                                                                                  |                                                                                                                                                                                                                     | Study characteristics                                                                                                                                                                                                                                                                                                                      | Outcome                                                                                                                                                                                                                                                                                                                                                                                                                                                                                               |
|                                                                                                                  | <ul style="list-style-type: none"> <li>Exposure: Time of birth</li> </ul>                                                                                                                                           | <ul style="list-style-type: none"> <li>Time between exposure and outcome: 58 years</li> <li>NOS Score: 6 <ul style="list-style-type: none"> <li>Selection: 3</li> <li>Comparability: 2</li> <li>Outcome: 1</li> </ul> </li> </ul>                                                                                                          | <ul style="list-style-type: none"> <li>Outcome: Obesity</li> <li>Measured: Body mass index &gt;30 kg/m<sup>2</sup></li> <li>Epidemiological measure: Relative risk</li> <li>Effect estimate and direction (as reported): 1.00 (95% CI 0.82 to 1.22); No change</li> <li>Outcome: Body mass index</li> <li>Measured: Not reported</li> <li>Epidemiological measure: Adjusted beta coefficient</li> <li>Effect estimate and direction (as reported): -0.16 (95% CI -0.38 to 0.07); No change</li> </ul> |
| <b>Stanner 2001</b> <ul style="list-style-type: none"> <li>Funding: Yes</li> <li>Ethics: Not reported</li> </ul> | <ul style="list-style-type: none"> <li>Design: Cohort</li> <li>Conflict: Siege of Leningrad (1941-1944)</li> <li>Jurisdiction: City</li> <li>Setting: Hospital</li> <li>Exposure: Time of birth</li> </ul>          | <ul style="list-style-type: none"> <li>Study year: Not reported</li> <li>Sample size: 549</li> <li>Age: 53 years</li> <li>% Male: 27</li> <li>Time between exposure and outcome: 59 years</li> <li>NOS Score: 4 <ul style="list-style-type: none"> <li>Selection: 3</li> <li>Comparability: 0</li> <li>Outcome: 1</li> </ul> </li> </ul>   | <ul style="list-style-type: none"> <li>Outcome: Body mass index</li> <li>Measured: Weighed in light clothing and without shoes on a beam balance. Height recorded on a stadiometer.</li> <li>Epidemiological measure: Mean</li> <li>Effect estimate and direction (as reported): 26.2 (95% CI 25.8 to 26.7) vs. 26.2 (95% CI 25.7 to 26.6); No change</li> </ul>                                                                                                                                      |
| <b>Vespa 1995</b> <ul style="list-style-type: none"> <li>Funding: Yes</li> <li>Ethics: Not reported</li> </ul>   | <ul style="list-style-type: none"> <li>Design: Cohort</li> <li>Conflict: Bosnian War (1992-1995)</li> <li>Jurisdiction: Subnational</li> <li>Setting: Community</li> <li>Exposure: Internal displacement</li> </ul> | <ul style="list-style-type: none"> <li>Study year: 1993-1994</li> <li>Sample size: 1739</li> <li>Age: 18+</li> <li>% Male: Not reported</li> <li>Time between exposure and outcome: 2 years</li> <li>NOS Score: 5 <ul style="list-style-type: none"> <li>Selection: 3</li> <li>Comparability: 0</li> <li>Outcome: 2</li> </ul> </li> </ul> | <ul style="list-style-type: none"> <li>Outcome: Body mass index</li> <li>Measured: Body mass index &lt;18.5</li> <li>Epidemiological measure: Relative risk</li> <li>Effect estimate and direction (recalculated): 0.75 (95% CI 0.34 to 1.64); No change</li> <li>Outcome: Low nutritional status</li> <li>Measured: Body mass index &lt;20</li> <li>Epidemiological measure: Relative risk</li> </ul>                                                                                                |

| Author, funding, ethics | Study design and setting | Body mass index<br>Study characteristics | Outcome                                                                                                                                                                                                                                                                                                                                                                                                                                                                                           |
|-------------------------|--------------------------|------------------------------------------|---------------------------------------------------------------------------------------------------------------------------------------------------------------------------------------------------------------------------------------------------------------------------------------------------------------------------------------------------------------------------------------------------------------------------------------------------------------------------------------------------|
|                         |                          |                                          | <ul style="list-style-type: none"> <li>• Effect estimate and direction (recalculated):<br/>1.15 (95% CI 1.06 to 1.23);<br/>Increase</li> <br/> <li>• Outcome: Body mass index</li> <li>• Measured: Soehnle electronic scales for weight and pocket stadiometer with spirit level (model 1A25) for height</li> <li>• Epidemiological measure: Mean</li> <li>• Effect estimate and direction (as reported):<br/>22.8 (95% CI 22.5 to 23.2) vs. 22.9 (95% CI 22.5 to 23.2);<br/>No change</li> </ul> |

| Author, funding, ethics                                                                                                      | Study design and setting                                                                                                                                                                                                  | Physical inactivity                                                                                                                                                                                                                                                                                                                     |                                                                                                                                                                                                                                                                                                                                                                                            |
|------------------------------------------------------------------------------------------------------------------------------|---------------------------------------------------------------------------------------------------------------------------------------------------------------------------------------------------------------------------|-----------------------------------------------------------------------------------------------------------------------------------------------------------------------------------------------------------------------------------------------------------------------------------------------------------------------------------------|--------------------------------------------------------------------------------------------------------------------------------------------------------------------------------------------------------------------------------------------------------------------------------------------------------------------------------------------------------------------------------------------|
|                                                                                                                              |                                                                                                                                                                                                                           | Study characteristics                                                                                                                                                                                                                                                                                                                   | Outcome                                                                                                                                                                                                                                                                                                                                                                                    |
| <b>Kadojic 1999</b> <ul style="list-style-type: none"> <li>Funding: Not reported</li> <li>Ethics: Not reported</li> </ul>    | <ul style="list-style-type: none"> <li>Design: Case-control</li> <li>Conflict: Croatian War of Independence (1991 to 1995)</li> <li>Jurisdiction: Camp</li> <li>Setting: Community</li> <li>Exposure: PTSD</li> </ul>     | <ul style="list-style-type: none"> <li>Study year: Not reported</li> <li>Sample size: 240</li> <li>Age: 47 years</li> <li>% Male: 42</li> <li>Time between exposure and outcome: 7 years</li> <li>NOS Score: 6 <ul style="list-style-type: none"> <li>Selection: 2</li> <li>Comparability: 2</li> <li>Outcome: 2</li> </ul> </li> </ul> | <ul style="list-style-type: none"> <li>Outcome: Physical inactivity</li> <li>Measured: Considered adequate or inadequate based on occupation, job, max physical activity of the individual and physical activity after regular work</li> <li>Epidemiological measure: Relative risk</li> <li>Effect estimate and direction (recalculated): 2.50 (95% CI 2.18 to 2.82); Increase</li> </ul> |
| <b>Ghazanfari 2009</b> <ul style="list-style-type: none"> <li>Funding: Not reported</li> <li>Ethics: Not reported</li> </ul> | <ul style="list-style-type: none"> <li>Design: Cohort</li> <li>Conflict: Iran-Iraq War (1980-1988)</li> <li>Jurisdiction: Subnational</li> <li>Setting: Community</li> <li>Exposure: Chemical warfare exposure</li> </ul> | <ul style="list-style-type: none"> <li>Study year: 2006</li> <li>Sample size: 482</li> <li>Age: 20-60 years</li> <li>% Male: 100</li> <li>Time between exposure and outcome: 20 years</li> <li>NOS Score: 4 <ul style="list-style-type: none"> <li>Selection: 4</li> <li>Comparability: 0</li> <li>Outcome: 0</li> </ul> </li> </ul>    | <ul style="list-style-type: none"> <li>Outcome: Rate of physical activity (min/week)</li> <li>Measured: Self-reported</li> <li>Epidemiological measure: Mean</li> <li>Effect estimate and direction (recalculated): -0.25 (95% CI -0.56 to 0.06); No change</li> </ul>                                                                                                                     |

| Author, funding, ethics                                                                                        | Study design and setting                                                                                                                                                                                   | Nutrition                                                                                                                                                                                                                                                                                                                                                    |                                                                                                                                                                                                                                                           |
|----------------------------------------------------------------------------------------------------------------|------------------------------------------------------------------------------------------------------------------------------------------------------------------------------------------------------------|--------------------------------------------------------------------------------------------------------------------------------------------------------------------------------------------------------------------------------------------------------------------------------------------------------------------------------------------------------------|-----------------------------------------------------------------------------------------------------------------------------------------------------------------------------------------------------------------------------------------------------------|
|                                                                                                                |                                                                                                                                                                                                            | Study characteristics                                                                                                                                                                                                                                                                                                                                        | Outcome                                                                                                                                                                                                                                                   |
| <b>Gaffar 2011</b> <ul style="list-style-type: none"> <li>Funding: No</li> <li>Ethics: Not reported</li> </ul> | <ul style="list-style-type: none"> <li>Design: Ecological</li> <li>Conflict: Sudan Civil War (1983-2015)</li> <li>Jurisdiction: National</li> <li>Setting: Community</li> <li>Exposure: Uniform</li> </ul> | <ul style="list-style-type: none"> <li>Study year: 2000-2005</li> <li>Sample size: Not reported</li> <li>Age: Not reported</li> <li>% Male: Not reported</li> <li>Time between exposure and outcome: 22 years</li> <li>NOS Score: 4 <ul style="list-style-type: none"> <li>Selection: 3</li> <li>Comparability: 0</li> <li>Outcome: 1</li> </ul> </li> </ul> | <ul style="list-style-type: none"> <li>Salt consumption (iodised)</li> <li>Measured: Self-reported</li> <li>Epidemiological measure: Relative risk</li> <li>Effect estimate and direction (recalculated): 1.82 (95% CI 1.00 to 3.31); Increase</li> </ul> |

| <b>Tobacco</b>                                                                                                               |                                                                                                                                                                                                                  |                                                                                                                                                                                                                                                                                                                                                                              |                                                                                                                                                                                                                                                            |
|------------------------------------------------------------------------------------------------------------------------------|------------------------------------------------------------------------------------------------------------------------------------------------------------------------------------------------------------------|------------------------------------------------------------------------------------------------------------------------------------------------------------------------------------------------------------------------------------------------------------------------------------------------------------------------------------------------------------------------------|------------------------------------------------------------------------------------------------------------------------------------------------------------------------------------------------------------------------------------------------------------|
| <b>Author, funding, ethics</b>                                                                                               | <b>Study design and setting</b>                                                                                                                                                                                  | <b>Study characteristics</b>                                                                                                                                                                                                                                                                                                                                                 | <b>Outcome</b>                                                                                                                                                                                                                                             |
| <b>Babic 2013</b> <ul style="list-style-type: none"> <li>• Funding: Not reported</li> <li>• Ethics: Not reported</li> </ul>  | <ul style="list-style-type: none"> <li>• Design: Cross-sectional</li> <li>• Conflict: Bosnian War (1992-1995)</li> <li>• Jurisdiction: City</li> <li>• Setting: Hospital</li> <li>• Exposure: PTSD</li> </ul>    | <ul style="list-style-type: none"> <li>• Study year: Not reported</li> <li>• Sample size: 120</li> <li>• Age: 50-52 years</li> <li>• % Male: 100</li> <li>• Time between exposure and outcome: 20 years</li> <li>• NOS Score: 2               <ul style="list-style-type: none"> <li>- Selection: 0</li> <li>- Comparability: 2</li> <li>- Outcome: 0</li> </ul> </li> </ul> | <ul style="list-style-type: none"> <li>• Outcome: Cigarette use</li> <li>• Measured: Self-reported</li> <li>• Epidemiological measure: Relative risk</li> <li>• Effect estimate and direction (recalculated): 2.24 (95% CI 1.04-4.82); Increase</li> </ul> |
| <b>Creson 1996</b> <ul style="list-style-type: none"> <li>• Funding: Not reported</li> <li>• Ethics: Not reported</li> </ul> | <ul style="list-style-type: none"> <li>• Design: Cross-sectional</li> <li>• Conflict: Bosnian War (1992-1995)</li> <li>• Jurisdiction: City</li> <li>• Setting: Hospital</li> <li>• Exposure: Uniform</li> </ul> | <ul style="list-style-type: none"> <li>• Study year: 1994</li> <li>• Sample size: 39</li> <li>• Age: 39 years</li> <li>• % Male: 54</li> <li>• Time between exposure and outcome: 2 years</li> <li>• NOS Score: 1               <ul style="list-style-type: none"> <li>- Selection: 0</li> <li>- Comparability: 0</li> <li>- Outcome: 1</li> </ul> </li> </ul>               | <ul style="list-style-type: none"> <li>• Outcome: Cigarette use</li> <li>• Measured: Self-reported</li> <li>• Epidemiological measure: Mean</li> <li>• Effect estimate and direction (recalculated): 8.9 (95% CI 5.6 to 12.2); Increase</li> </ul>         |
| <b>Creson 2000</b> <ul style="list-style-type: none"> <li>• Funding: Not reported</li> <li>• Ethics: Not reported</li> </ul> | <ul style="list-style-type: none"> <li>• Design: Cross-sectional</li> <li>• Conflict: Bosnian War (1992-1995)</li> <li>• Jurisdiction: City</li> <li>• Setting: Hospital</li> <li>• Exposure: Uniform</li> </ul> | <ul style="list-style-type: none"> <li>• Study year: 1997</li> <li>• Sample size: 44</li> <li>• Age: 34 years</li> <li>• % Male: 27</li> <li>• Time between exposure and outcome: 5 years</li> <li>• NOS Score: 1               <ul style="list-style-type: none"> <li>- Selection: 0</li> <li>- Comparability: 0</li> <li>- Outcome: 1</li> </ul> </li> </ul>               | <ul style="list-style-type: none"> <li>• Outcome: Cigarette use</li> <li>• Measured: Self-reported</li> <li>• Epidemiological measure: Mean</li> <li>• Effect estimate and direction n(recalculated): 8.1 (95% CI 3.7 to 12.5); Increase</li> </ul>        |



| <b>Tobacco</b>                                                                                                               |                                                                                                                                                                                                                                                      |                                                                                                                                                                                                                                                                                                                                                      |                                                                                                                                                                                                                                                       |
|------------------------------------------------------------------------------------------------------------------------------|------------------------------------------------------------------------------------------------------------------------------------------------------------------------------------------------------------------------------------------------------|------------------------------------------------------------------------------------------------------------------------------------------------------------------------------------------------------------------------------------------------------------------------------------------------------------------------------------------------------|-------------------------------------------------------------------------------------------------------------------------------------------------------------------------------------------------------------------------------------------------------|
| <b>Author, funding, ethics</b>                                                                                               | <b>Study design and setting</b>                                                                                                                                                                                                                      | <b>Study characteristics</b>                                                                                                                                                                                                                                                                                                                         | <b>Outcome</b>                                                                                                                                                                                                                                        |
| <b>Farhood 2010</b> <ul style="list-style-type: none"> <li>Funding: Not reported</li> <li>Ethics: Yes</li> </ul>             | <ul style="list-style-type: none"> <li>Design: Cross-sectional</li> <li>Conflict: Lebanese Civil War (1975-1991)</li> <li>Jurisdiction: Subnational</li> <li>Setting: Community</li> <li>Exposure: Hostage of war</li> </ul>                         | <ul style="list-style-type: none"> <li>Study year: 2002</li> <li>Sample size: 208</li> <li>Age: 31-33 years</li> <li>% Male: 91</li> <li>Time between exposure and outcome: 27</li> <li>NOS Score: 5 <ul style="list-style-type: none"> <li>Selection: 2</li> <li>Comparability: 2</li> <li>Outcome: 1</li> </ul> </li> </ul>                        | <ul style="list-style-type: none"> <li>Outcome: Smoking</li> <li>Measured: Self-reported</li> <li>Epidemiological measure: Relative risk</li> <li>Effect estimate and direction (recalculated): 1.75 (95% CI 1.66 to 1.85); Increase</li> </ul>       |
| <b>Ghazanfari 2009</b> <ul style="list-style-type: none"> <li>Funding: Not reported</li> <li>Ethics: Not reported</li> </ul> | <ul style="list-style-type: none"> <li>Design: Cohort</li> <li>Conflict: Iran-Iraq War (1980-1988)</li> <li>Jurisdiction: Subnational</li> <li>Setting: Community</li> <li>Exposure: Chemical warfare exposure</li> </ul>                            | <ul style="list-style-type: none"> <li>Study year: 2006</li> <li>Sample size: 482</li> <li>Age: 20-60 years</li> <li>% Male: 100</li> <li>Time between exposure and outcome: 20 years</li> <li>NOS Score: 4 <ul style="list-style-type: none"> <li>Selection: 4</li> <li>Comparability: 0</li> <li>Outcome: 0</li> </ul> </li> </ul>                 | <ul style="list-style-type: none"> <li>Outcome: Smoking</li> <li>Measured: Self-reported</li> <li>Epidemiological measure: Relative risk</li> <li>Effect estimate and direction (recalculated): 1.20 (95% CI 1.13 to 1.28); Increase</li> </ul>       |
| <b>Gomez-Restrepo 2016</b> <ul style="list-style-type: none"> <li>Funding: Yes</li> <li>Ethics: Yes</li> </ul>               | <ul style="list-style-type: none"> <li>Design: Cross-sectional</li> <li>Conflict: Colombian Conflict (1975-2015)</li> <li>Jurisdiction: National</li> <li>Setting: Community</li> <li>Exposure: Exposed to specific armed conflict events</li> </ul> | <ul style="list-style-type: none"> <li>Study year: 1986-1995</li> <li>Sample size: 1374</li> <li>Age: Not reported</li> <li>% Male: Not reported</li> <li>Time between exposure and outcome: 40 years</li> <li>NOS Score: 3 <ul style="list-style-type: none"> <li>Selection: 1</li> <li>Comparability: 0</li> <li>Outcome: 2</li> </ul> </li> </ul> | <ul style="list-style-type: none"> <li>Outcome: Cigarette use</li> <li>Measured: Self-reported</li> <li>Epidemiological measure: Relative risk</li> <li>Effect estimate and direction (recalculated): 1.49 (95% CI 1.39 to 1.58); Increase</li> </ul> |

| <b>Tobacco</b>                                                                                                                |                                                                                                                                                                                                                                                                           |                                                                                                                                                                                                                                                                                                                                                                         |                                                                                                                                                                                                                                                                                                                                    |
|-------------------------------------------------------------------------------------------------------------------------------|---------------------------------------------------------------------------------------------------------------------------------------------------------------------------------------------------------------------------------------------------------------------------|-------------------------------------------------------------------------------------------------------------------------------------------------------------------------------------------------------------------------------------------------------------------------------------------------------------------------------------------------------------------------|------------------------------------------------------------------------------------------------------------------------------------------------------------------------------------------------------------------------------------------------------------------------------------------------------------------------------------|
| <b>Author, funding, ethics</b>                                                                                                | <b>Study design and setting</b>                                                                                                                                                                                                                                           | <b>Study characteristics</b>                                                                                                                                                                                                                                                                                                                                            | <b>Outcome</b>                                                                                                                                                                                                                                                                                                                     |
| <b>Idris 2018</b> <ul style="list-style-type: none"> <li>• Funding: No</li> <li>• Ethics: Yes</li> </ul>                      | <ul style="list-style-type: none"> <li>• Design: Cross-sectional</li> <li>• Conflict: Syrian Civil War (2011-present)</li> <li>• Jurisdiction: Subnational</li> <li>• Setting: Educational establishment</li> <li>• Exposure: Internal displacement</li> </ul>            | <ul style="list-style-type: none"> <li>• Study year: 2015</li> <li>• Sample size: 1027</li> <li>• Age: 22 years</li> <li>• % Male: 56</li> <li>• Time between exposure and outcome: 4 years</li> <li>• NOS Score: 1               <ul style="list-style-type: none"> <li>- Selection: 1</li> <li>- Comparability: 0</li> <li>- Outcome: 0</li> </ul> </li> </ul>        | <ul style="list-style-type: none"> <li>• Outcome: Number of daily cigarettes smoked</li> <li>• Measured: Self-reported</li> <li>• Epidemiological measure: Mean</li> <li>• Effect estimate and direction (recalculated): 5.99 (95% CI 4.68 to 7.30); Increase</li> </ul>                                                           |
| <b>Kadojic 1999</b> <ul style="list-style-type: none"> <li>• Funding: Not reported</li> <li>• Ethics: Not reported</li> </ul> | <ul style="list-style-type: none"> <li>• Design: Case-control</li> <li>• Conflict: Croatian War of Independence (1991 to 1995)</li> <li>• Jurisdiction: Camp</li> <li>• Setting: Community</li> <li>• Exposure: PTSD</li> </ul>                                           | <ul style="list-style-type: none"> <li>• Study year: Not reported</li> <li>• Sample size: 240</li> <li>• Age: 47 years</li> <li>• % Male: 42</li> <li>• Time between exposure and outcome: 7 years</li> <li>• NOS Score: 6               <ul style="list-style-type: none"> <li>- Selection: 2</li> <li>- Comparability: 2</li> <li>- Outcome: 2</li> </ul> </li> </ul> | <ul style="list-style-type: none"> <li>• Outcome: Smoking</li> <li>• Measured: Self-reported</li> <li>• Epidemiological measure: Relative risk</li> <li>• Effect estimate and direction (recalculated): 1.40 (95% CI 1.30 to 1.50); Increase</li> </ul>                                                                            |
| <b>Roberts 2013</b> <ul style="list-style-type: none"> <li>• Funding: Yes</li> <li>• Ethics: Yes</li> </ul>                   | <ul style="list-style-type: none"> <li>• Design: Cross-sectional</li> <li>• Conflict: Georgian-Ossetian Conflict (1989-present)</li> <li>• Jurisdiction: National</li> <li>• Setting: Community</li> <li>• Exposure: Exposed to specific armed conflict events</li> </ul> | <ul style="list-style-type: none"> <li>• Study year: 2011</li> <li>• Sample size: 1248</li> <li>• Age: 48 years</li> <li>• % Male: 100</li> <li>• Time between exposure and outcome: 22 years</li> <li>• NOS Score: 5               <ul style="list-style-type: none"> <li>- Selection: 4</li> <li>- Comparability: 0</li> <li>- Outcome: 1</li> </ul> </li> </ul>      | <ul style="list-style-type: none"> <li>• Outcome: At least one cigarette, papirossi, pipe, or cigar daily</li> <li>• Measured: Self-reported</li> <li>• Epidemiological measure: Prevalence</li> <li>• Effect estimate and direction (as reported): 51.2 (95% CI 47.7 to 54.6) vs. 40.4 (95% CI 35.7 to 45.0); Increase</li> </ul> |

| <b>Tobacco</b>                                                                                                               |                                                                                                                                                                                                                                                     |                                                                                                                                                                                                                                                                                                                                                                               |                                                                                                                                                                                                                                                                                    |
|------------------------------------------------------------------------------------------------------------------------------|-----------------------------------------------------------------------------------------------------------------------------------------------------------------------------------------------------------------------------------------------------|-------------------------------------------------------------------------------------------------------------------------------------------------------------------------------------------------------------------------------------------------------------------------------------------------------------------------------------------------------------------------------|------------------------------------------------------------------------------------------------------------------------------------------------------------------------------------------------------------------------------------------------------------------------------------|
| <b>Author, funding, ethics</b>                                                                                               | <b>Study design and setting</b>                                                                                                                                                                                                                     | <b>Study characteristics</b>                                                                                                                                                                                                                                                                                                                                                  | <b>Outcome</b>                                                                                                                                                                                                                                                                     |
| <b>Santic 2006</b> <ul style="list-style-type: none"> <li>• Funding: Not reported</li> <li>• Ethics: Not reported</li> </ul> | <ul style="list-style-type: none"> <li>• Design: Cohort</li> <li>• Conflict: Bosnian War (1992-1995)</li> <li>• Jurisdiction: Subnational</li> <li>• Setting: Community</li> <li>• Exposure: Loss of family member during armed conflict</li> </ul> | <ul style="list-style-type: none"> <li>• Study year: 1996 and 2003</li> <li>• Sample size: 1726</li> <li>• Age: 50-52 years</li> <li>• % Male: 71</li> <li>• Time between exposure and outcome: 11 years</li> <li>• NOS Score: 2               <ul style="list-style-type: none"> <li>- Selection: 1</li> <li>- Comparability: 0</li> <li>- Outcome: 1</li> </ul> </li> </ul> | <ul style="list-style-type: none"> <li>• Outcome: Smoking</li> <li>• Measured: Self-reported, irrespective of intensity</li> <li>• Epidemiological measure: Relative risk</li> <li>• Effect estimate and direction (recalculated): 1.23 (95% CI 1.00 to 1.51); Increase</li> </ul> |
| <b>Sokolova-Djokic 2008</b> <ul style="list-style-type: none"> <li>• Funding: Not reported</li> <li>• Ethics: Yes</li> </ul> | <ul style="list-style-type: none"> <li>• Design: Cross-sectional</li> <li>• Conflict: NATO bombing of Yugoslavia (1999)</li> <li>• Jurisdiction: Subnational</li> <li>• Setting: Community</li> <li>• Exposure: Uniform</li> </ul>                  | <ul style="list-style-type: none"> <li>• Study year: 2007</li> <li>• Sample size: 316</li> <li>• Age: 42 years</li> <li>• % Male: 44</li> <li>• Time between exposure and outcome: 8 years</li> <li>• NOS Score: 3               <ul style="list-style-type: none"> <li>- Selection: 3</li> <li>- Comparability: 0</li> <li>- Outcome: 0</li> </ul> </li> </ul>               | <ul style="list-style-type: none"> <li>• Outcome: Smoking</li> <li>• Measured: Self-reported</li> <li>• Epidemiological measure: Relative risk</li> <li>• Effect estimate and direction (recalculated): 1.09 (95% CI 1.06 to 1.12); Increase</li> </ul>                            |

### Additional references for nine outcomes with inconsistent evidence

- Essential hypertension<sup>1-12</sup>
- Unspecified heart disease<sup>8,12-15</sup>
- Unspecified stroke<sup>4,8,16-18</sup>
- Unspecified diabetes mellitus<sup>2,4,6-8,10,12,13,19,20</sup>
- Diastolic blood pressure<sup>1-4,13,21-23</sup>
- High density lipoprotein<sup>4,5,13</sup>
- Triglycerides<sup>1,3-7,13,24,25</sup>
- Alcohol<sup>5-7,26-38</sup>
- Obesity<sup>2-6,21,39</sup>

### Additional references for 19 outcomes with inadequate evidence

- Cardiovascular disease outcomes<sup>1,3,5,6,12,21,22,40-45</sup>
- Impaired glucose tolerance<sup>2,13</sup>
- Low density lipoprotein<sup>13</sup>
- Access to iodised salt<sup>46</sup>
- Underweight<sup>47</sup>
- Physical inactivity<sup>6,39</sup>

1. Koupil I, Shestov DB, Sparén P, Plavinskaja S, Parfenova N, Vågerö D. Blood pressure, hypertension and mortality from circulatory disease in men and women who survived the siege of Leningrad. *European journal of Epidemiological measure* 2007; **22**(4): 223-34.
2. Hult M, Tornhammar P, Ueda P, et al. Hypertension, diabetes and overweight: looming legacies of the Biafran famine. *PLoS ONE [Electronic Resource]* 2010; **5**(10): e13582.
3. Kulenovic I, Robertson A, Grujic M, Suljevic E, Smajkic A. The impact of war on Sarajevans with non-insulin-dependent diabetes mellitus. *The European Journal of Public Health* 1996; **6**(4): 252-6.
4. Rotar O, Moguchaia E, Boyarinova M, et al. Seventy years after the siege of Leningrad: does early life famine still affect cardiovascular risk and aging? *J Hypertens* 2015; **33**(9): 1772-9.
5. Babić R, Maslov B, Babić D, Vasilj I. The Relative risk of metabolic syndrome in patient with posttraumatic stress disorder. *Psychiatria Danubina* 2013; **25 Suppl 1**: 45-50.
6. Kadojić D, Demarin V, Kadojić M, Mihaljević I, Barac B. Influence of Prolonged Stress on Risk Factors for Cerebrovascular Disease. *Coll Antropol* 1999; **23**(1): 213-9.
7. Šantić Ž, Lukić A, Sesar D, Miličević S, Ilakovac V. Long-term follow-up of blood pressure in family members of soldiers killed during the war in Bosnia and Herzegovina. *Croatian medical journal* 2006; **47**(3): 416-23.
8. Gomez-Restrepo C, Rincon CJ, Medina-Rico M. [Chronic diseases in the population affected by the armed conflict in Colombia, 2015]. *Pan American Journal of Public Health* 2018; **41**: e144.
9. Islam A, Raschky P, Smyth R. The Long-Term Health Effects of Mass Political Violence: Evidence from China's Cultural Revolution. *Social Indicators Research* 2017; **132**(1): 257-72.

10. McEniry M, Samper-Ternent R, Florez CE, Cano-Gutierrez C. Early Life Displacement Due to Armed Conflict and Violence, Early Nutrition, and Older Adult Hypertension, Diabetes, and Obesity in the Middle-Income Country of Colombia. *Journal of Aging & Health* 2018; 898264318778111.
11. Tomić V, Petrović O, Petrov B, Bjelanović V, Naletilić M. Hypertensive disorders in pregnancy: a 5-year analysis of the wartime and postwar period in South-Western region of Bosnia and Herzegovina. *Collegium antropologicum* 2009; **33 Suppl 2**: 115-9.
12. Torinek T, Katic M, Kern J. Morbidity of native, immigrant, and returned refugee populations in family medicine practice in Croatia after 1991-1995 war. *Croatian Medical Journal* 2005; **46**(6): 990-5.
13. Stanner SA, Yudkin JS. Fetal programming and the Leningrad Siege study. *Twin research and human genetics* 2001; **4**(5): 287-92.
14. Atwoli L, Platt JM, Basu A, Williams DR, Stein DJ, Koenen KC. Associations between lifetime potentially traumatic events and chronic physical conditions in the South African Stress and Health Survey: a cross-sectional study. *BMC Psychiatry* 2016; **16**: 214.
15. Ghaddar A, Elsouiri G, Abboud Z. Torture and long-term health effects among Lebanese female political prisoners. *Journal of Interpersonal Violence* 2016; **31**(3): 500-14.
16. Dimitrijević J, Dzirlo K, Bratić M, et al. 10-year analysis of cerebrovascular accidents at the Neurology Clinic in Sarajevo (before, during and after the war). *Medicinski arhiv* 2002; **56**(3): 151-3.
17. Kadojić D, Barac B, Trkanjec Z, Kadojić M. The secular trend in the incidence of hemorrhagic stroke in the region of Osijek, Eastern Croatia in the period 1988-2000--a hospital based study. *Collegium antropologicum* 2002; **26**(2): 627-34.
18. Lusic I. Incidence of cerebrovascular insult in Split. *European Neurology* 1998; **40**(2): 112.
19. Alajbegović S, Metelko Ž, Alajbegović A, Suljić E, Resić H, Poljaković D. Cigarette smoking, alcohol consumption, overweight and obesity in diabetic and nondiabetic patients with acute myocardial infarction. *Diabetologia Croatica* 2002; **31**(4): 223-9.
20. Metelko Z, Roglic G, Skrabalo Z. Diabetes in time of armed conflict: The Croatian experience. *World Health Statistics Quarterly* 1992; **45**(4): 328-33.
21. Sparén P, Vågerö D, Shestov DB, et al. Long term mortality after severe starvation during the siege of Leningrad: prospective cohort study. *BMJ* 2004; **328**(7430): 11.
22. Vågerö D, Koupil I, Parfenova N, Sparen P. Long term health consequences following the Siege of Leningrad. *Early Life Nutrition and Adult Health and Development* 2013: 207-25.
23. Obilom RE, Thacher TD. Posttraumatic stress disorder following ethnoreligious conflict in Jos, Nigeria. *Journal of Interpersonal Violence* 2008; **23**(8): 1108-19.
24. Pibernik-Okanovic M, Roglic G, Prasek M, Metelko Z. War-induced prolonged stress and metabolic control in type 2 diabetic patients. *Psychological Medicine* 1993; **23**(3): 645-51.
25. Roglic G, Metelko Z. Effect of war on glycemic control in type II diabetic patients. *Diabetes Care* 1993; **16**(5): 806-8.
26. Gomez-Restrepo C, Tamayo-Martinez N, Buitrago G, et al. [Violence due to Armed Conflict and Relative risk of Mood Disorders, Anxiety and Mental Problems in the Colombian Adult Population]. *Revista Colombiana de Psiquiatria* 2016; **45 Suppl 1**: 147-53.
27. Farhood LF, Chaaya M, Saab BR. Detainment and health: The case of the Lebanese hostages of war. *International Journal of Mental Health Nursing* 2010; **19**(2): 83-91.
28. Ertl V, Preuse M, Neuner F. Are Drinking Motives Universal? Characteristics of Motive Types in Alcohol-Dependent Men from Two Diverse Populations. *Frontiers in psychiatry Frontiers Research Foundation* 2018; **9**: 38.

29. Gilic A, Skifie B, Ticic D, Sokota A. [Specific traits in the admission of patients for alcohol abuse before, during and after the Croatian War for Independence in Zadar General Hospital]. *Med Jad* 2005; **35**: 1-2.
30. Jewkes R, Jama-Shai N, Sikweyiya Y. Enduring impact of conflict on mental health and gender-based violence perpetration in Bougainville, Papua New Guinea: A cross-sectional study. *PLoS ONE [Electronic Resource]* 2017; **12**(10): e0186062.
31. Kozaric-Kovacic D, Ljubin T, Grappe M. Comorbidity of posttraumatic stress disorder and alcohol dependence in displaced persons. *Croatian Medical Journal* 2000; **41**(2): 173-8.
32. Lien L, Hauff E, Martinez P, Eide AH, Swarts L, Ayazi T. Alcohol use in South Sudan in relation to social factors, mental distress and traumatic events. *BMC Public Health* 2016; **16**: 937.
33. Londoño A, Romero P, Casas G. The association between armed conflict, violence and mental health: a cross sectional study comparing two populations in Cundinamarca department, Colombia. *Conflict and health* 2012; **6**(1): 12.
34. Puac-Polanco VD, Lopez-Soto VA, Kohn R, Xie DW, Richmond TS, Branas CC. Previous Violent Events and Mental Health Outcomes in Guatemala. *American Journal of Public Health* 2015; **105**(4): 764-71.
35. Puertas G, Rios C, del Valle H. [The Relative risk of common mental disorders in urban slums with displaced persons in Colombia]. *Pan American Journal of Public Health* 2006; **20**(5): 324-30.
36. Roberts B, Felix Ocaka K, Browne J, Oyok T, Sondorp E. Alcohol disorder amongst forcibly displaced persons in northern Uganda. *Addictive Behaviors* 2011; **36**(8): 870-3.
37. Roberts B, Murphy A, Chikovani I, Makhshvili N, Patel V, McKee M. Individual and community level risk-factors for alcohol use disorder among conflict-affected persons in Georgia. *PLoS ONE [Electronic Resource]* 2014; **9**(5): e98299.
38. de la Espriella Guerrero RA, Rodriguez V, Rincon CJ, Morales DC, Rodriguez SJ, Gomez-Restrepo C. [Alcohol Consumption in the Colombian Population, 2015 National Mental Health Survey]. *Revista Colombiana de Psiquiatria* 2016; **45 Suppl 1**: 76-88.
39. Ghazanfari Z, Ghazanfari T, Araghizadeh H, et al. Physical activity of the civilian chemical victims of Sardasht 20 years after sulfur mustard exposure. *Toxin Reviews* 2009; **28**(1): 48-53.
40. Bergovec M, Mihatov S, Prpic H, et al. [The effect of war-induced stress in Croatia on the incidence and mortality of acute ischemic heart disease]. *Wiener Medizinische Wochenschrift* 1992; **142**(19): 430-2.
41. Mihatov S, Bergovec M, Prpic H, et al. Incidence and hospital mortality of acute coronary artery disease among civilians in Zagreb during air-raid alarms. *Acta Medica Croatica* 1995; **49**(2): 49-52.
42. Kadojić D, Demarin V, Bozicevic D, Balentic V, Kadojić M. Frequency and clinical characteristics of spontaneous cerebral hemorrhage during the 1991-1992 war. *Neurologica Croatica* 1996; **45**(1): 7-14.
43. Roglic G, Pavlic-Renar I, Sestan-Crnek S, et al. Incidence of IDDM during 1988-1992 in Zagreb, Croatia. *Diabetologia* 1995; **38**(5): 550-4.
44. Vasilj I, Bergovec M, Kvesić A, et al. Acute coronary syndrome frequency in western Herzegovina over the fifteen year period (1987-2001). *Collegium Antropologicum* 2006A; **30**(4): 915-9.
45. Vasilj I, Ostojić Z, Ostojić L, Zelenika D, Misković J. Hospital outcome in acute coronary syndrome in the period 1987-2001 in West-Herzegovina canton--retrospective study. *Medicinski arhiv* 2006B; **60**(5): 312-4.

46. Mutwakel Gaffar A, Salih Mahfouz M. Peace impact on health: population access to iodized salt in south Sudan in postconflict period. *Croatian medical journal* 2011; **52**(2): 178-82.
47. Vespa J, Watson F. Who is nutritionally vulnerable in Bosnia-Herzegovina? *BMJ* 1995; **311**(7006): 652-4.
